# Supplementary material for: Deciphering Proteomic Signatures of Early Diapause in Nasonia
Source: PLoS One. 2009 Jul 28;4(7):e6394. doi: 10.1371/journal.pone.0006394 (PMC2712079; doi:10.1371/journal.pone.0006394)
Supplement: Table S1 — Peptides identified in diapausing and non-diapausing Nasonia larvae combined under protein accession numbers. DP6-8: diapausing larvae collected at days 6-8. NDP6: non-diapausing larvae collected at day 6. (0.33 MB XLS) [file pone.0006394.s001.xls]

## Sheet: NDP6
gi#	Accession	log.E-Value Sum	Protein Score	%Coverage	#Pep.	#Unique Pep.	Protein Description	MW
gi|156544337	XP_001607303	-1924.12	-7393.57	25.71	171	42	PREDICTED: similar to CG17927-PF [Nasonia vitripennis]	224.5 kDa
gi|156542452	XP_001599110	-16224.9	-67782.9	57.48	1214	35	PREDICTED: similar to high Glx storage protein [Nasonia vitripennis]	102.6 kDa
gi|156542989	XP_001603025	-16860.1	-74083.3	53.83	659	32	PREDICTED: similar to high Glx storage protein [Nasonia vitripennis]	108.2 kDa
gi|156545565	XP_001607012	-2761.33	-9276.81	50.57	564	30	PREDICTED: similar to hexamerin 2 [Nasonia vitripennis]	83.7 kDa
gi|156538313	XP_001604024	-250.54	-752.01	7.95	43	18	PREDICTED: similar to apolipophorin [Nasonia vitripennis]	374.8 kDa
gi|156537243	XP_001605359	-827.91	-3419.88	33.67	72	15	PREDICTED: similar to protein disulfide isomerase [Nasonia vitripennis]	55.7 kDa
gi|156545567	XP_001607029	-503.54	-1870.55	30.31	76	14	PREDICTED: similar to hexamerin [Nasonia vitripennis]	81.6 kDa
gi|156545718	XP_001604915	-261.96	-869.15	14.83	54	11	PREDICTED: similar to hexamerin [Nasonia vitripennis]	94.8 kDa
gi|156546948	XP_001605607	-559.62	-1986.79	40.78	109	11	PREDICTED: similar to elongation factor 1-alpha isoform 1 [Nasonia vitripennis]	50.2 kDa
gi|156546950	XP_001605623	-559.62	-2000.28	44.03	109	11	PREDICTED: similar to elongation factor 1-alpha isoform 2 [Nasonia vitripennis]	46.7 kDa
gi|156548062	XP_001606111	-426.89	-1551.88	28.33	75	10	PREDICTED: similar to serpin 6 [Nasonia vitripennis]	58.9 kDa
gi|156541054	XP_001601342	-577.97	-2473.45	40.43	42	10	PREDICTED: similar to RE12057p isoform 1 [Nasonia vitripennis]	41.8 kDa
gi|156542175	XP_001600960	-571.06	-2446.11	34.84	41	9	PREDICTED: similar to RE12057p isoform 1 [Nasonia vitripennis]	41.8 kDa
gi|156554805	XP_001606158	-65.43	-242.71	30.59	12	8	PREDICTED: similar to teratocyte released chitinase [Nasonia vitripennis]	57.0 kDa
gi|156538985	XP_001600854	-111.29	-422.71	35.91	22	8	PREDICTED: similar to beta-1 tubulin, partial [Nasonia vitripennis]	37.3 kDa
gi|156549565	XP_001607253	-223.94	-819.92	21.01	37	8	PREDICTED: similar to ENSANGP00000024604 isoform 2 [Nasonia vitripennis]	59.7 kDa
gi|156549563	XP_001607238	-223.94	-821.21	21.25	37	8	PREDICTED: similar to ENSANGP00000024604 isoform 1 [Nasonia vitripennis]	59.1 kDa
gi|156544486	XP_001602474	-219.04	-889.37	57.89	35	8	PREDICTED: similar to apolipophorin-III [Nasonia vitripennis]	20.8 kDa
gi|156549941	XP_001602718	-287.55	-1152.98	44.74	44	8	PREDICTED: similar to putative alcohol dehydrogenase [Nasonia vitripennis]	29.2 kDa
gi|156541056	XP_001601369	-531.84	-2322.23	36.66	30	8	PREDICTED: similar to RE12057p isoform 2 [Nasonia vitripennis]	37.8 kDa
gi|156546036	XP_001600126	-50.26	-160.38	23.01	13	7	PREDICTED: similar to CG4898-PB [Nasonia vitripennis]	39.3 kDa
gi|156548568	XP_001606870	-157.6	-592.23	22.89	29	7	PREDICTED: similar to alpha tubulin [Nasonia vitripennis]	50.0 kDa
gi|156547846	XP_001604160	-176.29	-668.49	22.89	31	7	PREDICTED: similar to alpha tubulin [Nasonia vitripennis]	50.0 kDa
gi|156548149	XP_001607699	-176.29	-669.1	22.89	31	7	PREDICTED: similar to alpha tubulin [Nasonia vitripennis]	50.0 kDa
gi|156542177	XP_001600991	-524.93	-2294.64	30.5	29	7	PREDICTED: similar to RE12057p isoform 2 [Nasonia vitripennis]	37.8 kDa
gi|156554900	XP_001600911	-568.02	-2441.07	27.66	39	7	PREDICTED: similar to RE12057p isoform 1 [Nasonia vitripennis]	41.8 kDa
gi|156554898	XP_001600934	-568.02	-2441.07	27.66	39	7	PREDICTED: similar to RE12057p isoform 2 [Nasonia vitripennis]	41.8 kDa
gi|156545557	XP_001606463	-64.54	-201.05	12.59	16	6	PREDICTED: similar to ENSANGP00000012893 [Nasonia vitripennis]	72.7 kDa
gi|156554807	XP_001606170	-59.28	-216.57	15.34	11	6	PREDICTED: similar to teratocyte released chitinase [Nasonia vitripennis]	54.0 kDa
gi|156541821	XP_001600369	-60.68	-233.85	16.42	9	6	PREDICTED: similar to beta-hexosaminidase b [Nasonia vitripennis]	61.0 kDa
gi|156544504	XP_001605191	-89.13	-314.52	14.69	15	6	PREDICTED: similar to heat shock protein 90 [Nasonia vitripennis]	82.1 kDa
gi|156541962	XP_001600045	-107.14	-379.14	19.93	20	6	PREDICTED: similar to ENSANGP00000014839 [Nasonia vitripennis]	60.6 kDa
gi|156542120	XP_001601691	-163.34	-636.59	21.27	25	6	PREDICTED: hypothetical protein [Nasonia vitripennis]	26.2 kDa
gi|156547891	XP_001608047	-185.7	-786.73	44.7	21	6	PREDICTED: similar to fatty acid binding protein isoform 1 [Nasonia vitripennis]	15.0 kDa
gi|156554902	XP_001601057	-523.87	-2293.99	27.27	28	6	PREDICTED: similar to RE12057p isoform 3 [Nasonia vitripennis]	37.9 kDa
gi|156542193	XP_001599856	-642.6	-2317.4	6.15	87	6	PREDICTED: similar to major allergen Bla g 1.02 [Nasonia vitripennis]	159.5 kDa
gi|156545922	XP_001599003	-23.21	-76.77	26.41	6	5	PREDICTED: similar to tropomyosin 1 [Nasonia vitripennis]	32.3 kDa
gi|156543557	XP_001603460	-47.73	-152.6	14.51	15	5	PREDICTED: similar to GA17427-PA [Nasonia vitripennis]	51.1 kDa
gi|156542476	XP_001599672	-50.96	-181.93	19.07	11	5	PREDICTED: similar to ENSANGP00000014344 [Nasonia vitripennis]	43.9 kDa
gi|156553669	XP_001602360	-51.97	-194.53	16.14	10	5	PREDICTED: similar to beta-tubulin [Nasonia vitripennis]	49.9 kDa
gi|156548992	XP_001607265	-61.23	-203.83	16.97	14	5	PREDICTED: similar to CG5320-PF [Nasonia vitripennis]	60.9 kDa
gi|156541819	XP_001600338	-58.24	-227.44	14.98	8	5	PREDICTED: similar to beta-hexosaminidase b [Nasonia vitripennis]	56.0 kDa
gi|156545978	XP_001607122	-66.59	-228.51	18.31	16	5	PREDICTED: similar to arginine kinase-like protein [Nasonia vitripennis]	39.9 kDa
gi|156545932	XP_001601068	-72.98	-286.55	27.61	16	5	PREDICTED: similar to odorant-binding protein 1 [Nasonia vitripennis]	14.5 kDa
gi|156542554	XP_001599353	-75.23	-294.72	24.19	11	5	PREDICTED: similar to aminoacylase, putative [Nasonia vitripennis]	45.4 kDa
gi|156550530	XP_001602460	-127.57	-415.91	12.28	26	5	PREDICTED: similar to translation elongation factor 2 [Nasonia vitripennis]	96.5 kDa
gi|156553655	XP_001600547	-110.66	-429.32	32.84	18	5	PREDICTED: similar to mitochondrial malate dehydrogenase [Nasonia vitripennis]	35.9 kDa
gi|156539999	XP_001598993	-111.23	-442.2	28.42	21	5	PREDICTED: hypothetical protein [Nasonia vitripennis]	21.3 kDa
gi|156555785	XP_001603238	-123.94	-495.23	15.32	15	5	PREDICTED: similar to GH08974p [Nasonia vitripennis]	51.3 kDa
gi|156542118	XP_001601658	-161.02	-638.22	17.71	24	5	PREDICTED: hypothetical protein [Nasonia vitripennis]	20.9 kDa
gi|156555799	XP_001601504	-501.13	-2209.19	19.95	22	5	PREDICTED: similar to RE12057p isoform 1 [Nasonia vitripennis]	41.8 kDa
gi|156555801	XP_001601591	-501.13	-2214.67	21.99	22	5	PREDICTED: similar to RE12057p isoform 2 [Nasonia vitripennis]	37.9 kDa
gi|156548276	XP_001604985	-740.45	-3336.05	35.68	21	5	PREDICTED: similar to lethal(2)essential for life protein, l2efl [Nasonia vitripennis]	23.0 kDa
gi|156542010	XP_001599268	-17.82	-39.24	5.25	6	4	PREDICTED: similar to standard paramyosin [Nasonia vitripennis]	102.4 kDa
gi|156540778	XP_001599305	-24.39	-67.28	14.19	9	4	PREDICTED: similar to imaginal disc growth factor [Nasonia vitripennis]	48.3 kDa
gi|156538132	XP_001608247	-23.38	-83.32	27.19	6	4	PREDICTED: similar to myosin light chain isoform 1 [Nasonia vitripennis]	24.3 kDa
gi|156538130	XP_001608248	-23.38	-83.32	27.19	6	4	PREDICTED: similar to myosin light chain isoform 2 [Nasonia vitripennis]	24.3 kDa
gi|156551491	XP_001605187	-40.28	-112.43	6.61	13	4	PREDICTED: similar to ENSANGP00000011975 [Nasonia vitripennis]	75.1 kDa
gi|156554292	XP_001601054	-34.81	-123.3	11.78	8	4	PREDICTED: similar to putative fructose 1,6-bisphosphate aldolase [Nasonia vitripennis]	39.4 kDa
gi|156544237	XP_001606813	-42.92	-143.93	10.51	11	4	PREDICTED: similar to ENSANGP00000029516 [Nasonia vitripennis]	48.2 kDa
gi|156552049	XP_001603900	-41.3	-166.77	38.62	11	4	PREDICTED: similar to ENSANGP00000019735 [Nasonia vitripennis]	15.7 kDa
gi|156546548	XP_001607360	-47.93	-195.42	26.98	7	4	PREDICTED: similar to ferritin [Nasonia vitripennis]	24.1 kDa
gi|156550103	XP_001605745	-55.77	-245.15	46.58	7	4	PREDICTED: similar to Endocuticle structural glycoprotein SgAbd-1 [Nasonia vitripennis]	15.6 kDa
gi|156551117	XP_001601759	-85.84	-297.28	20.12	19	4	PREDICTED: similar to aldehyde dehydrogenase [Nasonia vitripennis]	51.2 kDa
gi|156547751	XP_001605713	-94.16	-351.77	11.32	14	4	PREDICTED: similar to CG5397-PA [Nasonia vitripennis]	80.4 kDa
gi|156555903	XP_001599313	-86.63	-356.22	45.95	14	4	PREDICTED: similar to myosin 2 light chain [Nasonia vitripennis]	16.5 kDa
gi|156552398	XP_001600211	-92.6	-376.25	29.19	16	4	PREDICTED: similar to conserved hypothetical protein [Nasonia vitripennis]	23.2 kDa
gi|156536931	XP_001608129	-105.55	-428.58	31.09	14	4	PREDICTED: similar to ribosomal protein S7 [Nasonia vitripennis]	22.3 kDa
gi|156547538	XP_001607474	-123.24	-510.43	20.06	13	4	PREDICTED: similar to glyceraldehyde-3-phosphate dehydrogenase [Nasonia vitripennis]	35.6 kDa
gi|156547893	XP_001608053	-153.58	-651.19	27.27	17	4	PREDICTED: similar to fatty acid binding protein isoform 2 [Nasonia vitripennis]	15.1 kDa
gi|156544929	XP_001603712	-173.59	-701.64	29.6	33	4	PREDICTED: similar to ENSANGP00000031916 [Nasonia vitripennis]	13.4 kDa
gi|156544972	XP_001607891	-181.91	-734.04	29.6	35	4	PREDICTED: similar to ENSANGP00000031916 [Nasonia vitripennis]	13.4 kDa
gi|156548926	XP_001606826	-192.78	-771.2	22.71	25	4	PREDICTED: similar to putative carboxypeptidase A-like [Nasonia vitripennis]	46.5 kDa
gi|156548902	XP_001606654	-216.67	-794.96	7.76	37	4	PREDICTED: similar to cytochrome P450 CYP4AB1 [Nasonia vitripennis]	54.8 kDa
gi|156544960	XP_001607585	-207.12	-853.06	29.6	34	4	PREDICTED: similar to ENSANGP00000031916 [Nasonia vitripennis]	13.4 kDa
gi|156544915	XP_001600014	-211.26	-857.02	27.21	36	4	PREDICTED: similar to ENSANGP00000031917 [Nasonia vitripennis]	14.6 kDa
gi|156539055	XP_001599770	-219.29	-900.22	29.6	37	4	PREDICTED: similar to ENSANGP00000031916 [Nasonia vitripennis]	13.4 kDa
gi|156548876	XP_001606447	-221.68	-904.81	28.24	37	4	PREDICTED: similar to ENSANGP00000032064 [Nasonia vitripennis]	14.2 kDa
gi|156545305	XP_001605491	-215.27	-905.38	41.11	36	4	PREDICTED: similar to ENSANGP00000031916 [Nasonia vitripennis]	9.6 kDa
gi|156548594	XP_001607717	-222.47	-914.86	29.6	37	4	PREDICTED: similar to ENSANGP00000031916 [Nasonia vitripennis]	13.4 kDa
gi|156544982	XP_001607947	-223.96	-918.78	29.6	38	4	PREDICTED: similar to ENSANGP00000031916 [Nasonia vitripennis]	13.4 kDa
gi|156544978	XP_001607931	-225.16	-921.34	29.6	39	4	PREDICTED: similar to ENSANGP00000031916 [Nasonia vitripennis]	13.4 kDa
gi|156549200	XP_001607826	-225.16	-921.34	29.6	39	4	PREDICTED: similar to ENSANGP00000031916 [Nasonia vitripennis]	13.4 kDa
gi|156536941	XP_001608227	-225.16	-921.34	29.6	39	4	PREDICTED: similar to ENSANGP00000031916 [Nasonia vitripennis]	13.4 kDa
gi|156536997	XP_001608288	-225.16	-921.34	29.84	39	4	PREDICTED: similar to ENSANGP00000031916 [Nasonia vitripennis]	13.4 kDa
gi|156539625	XP_001599199	-225.16	-921.34	29.6	39	4	PREDICTED: similar to ENSANGP00000031916 [Nasonia vitripennis]	13.4 kDa
gi|156545301	XP_001605462	-221.24	-925.7	41.11	39	4	PREDICTED: similar to ENSANGP00000031916 [Nasonia vitripennis]	9.6 kDa
gi|156542548	XP_001599282	-8.3	-18.61	6.2	3	3	PREDICTED: similar to CG5520-PA [Nasonia vitripennis]	90.6 kDa
gi|156537668	XP_001607866	-6.57	-19.6	24.21	3	3	PREDICTED: similar to Chymotrypsin-2 (Chymotrypsin II) [Nasonia vitripennis]	27.3 kDa
gi|156543342	XP_001607606	-10.76	-32.34	15.19	4	3	PREDICTED: similar to acidic p0 ribosomal protein [Nasonia vitripennis]	34.0 kDa
gi|156544964	XP_001607554	-11.68	-32.73	32.04	7	3	PREDICTED: similar to histone H4 [Nasonia vitripennis]	11.4 kDa
gi|156544925	XP_001603581	-12.84	-38.09	32.04	7	3	PREDICTED: similar to histone H4 [Nasonia vitripennis]	11.4 kDa
gi|156548636	XP_001608236	-14.01	-40.43	32.04	8	3	PREDICTED: similar to histone H4 [Nasonia vitripennis]	11.4 kDa
gi|156553444	XP_001599591	-14.1	-40.86	32.04	8	3	PREDICTED: similar to histone H4 [Nasonia vitripennis]	11.4 kDa
gi|156553446	XP_001599471	-14.1	-40.88	32.04	8	3	PREDICTED: similar to histone H4 [Nasonia vitripennis]	11.4 kDa
gi|156551982	XP_001601109	-14.2	-42.06	9.58	4	3	PREDICTED: similar to troponin T [Nasonia vitripennis]	48.3 kDa
gi|156548578	XP_001607366	-14.84	-44.29	32.04	8	3	PREDICTED: similar to histone H4 [Nasonia vitripennis]	11.4 kDa
gi|156536987	XP_001608282	-14.96	-44.81	32.04	8	3	PREDICTED: similar to histone H4 [Nasonia vitripennis]	11.4 kDa
gi|156552551	XP_001599009	-16.09	-46.23	32.04	9	3	PREDICTED: similar to histone H4 [Nasonia vitripennis]	11.4 kDa
gi|156540342	XP_001599230	-16.09	-47.02	32.04	9	3	PREDICTED: similar to histone H4 [Nasonia vitripennis]	11.4 kDa
gi|156544962	XP_001607557	-16.09	-47.02	32.04	9	3	PREDICTED: similar to histone H4 [Nasonia vitripennis]	11.4 kDa
gi|156544980	XP_001607925	-16.09	-47.02	32.04	9	3	PREDICTED: similar to histone H4 [Nasonia vitripennis]	11.4 kDa
gi|156536993	XP_001608285	-16.09	-47.02	32.04	9	3	PREDICTED: similar to histone H4 [Nasonia vitripennis]	11.4 kDa
gi|156548574	XP_001607199	-16.09	-47.02	32.04	9	3	PREDICTED: similar to histone H4 [Nasonia vitripennis]	11.4 kDa
gi|156544974	XP_001607894	-16.09	-47.02	32.04	9	3	PREDICTED: similar to histone H4 [Nasonia vitripennis]	11.4 kDa
gi|156544034	XP_001600115	-19.11	-48.19	12.41	7	3	PREDICTED: similar to ribosomal protein L3 [Nasonia vitripennis]	47.5 kDa
gi|156541477	XP_001600227	-16.14	-49.4	8.13	4	3	PREDICTED: similar to phosphoenolpyruvate carboxykinase [Nasonia vitripennis]	80.9 kDa
gi|156538833	XP_001607988	-15.07	-56.89	25.3	5	3	PREDICTED: similar to lectin-related protein [Nasonia vitripennis]	18.4 kDa
gi|156542191	XP_001600781	-31.49	-80.35	6.72	12	3	PREDICTED: similar to Elongation factor 1-alpha (EF-1-alpha) [Nasonia vitripennis]	50.6 kDa
gi|156555286	XP_001605157	-26.65	-100.64	12.05	5	3	PREDICTED: similar to cytosolic malate dehydrogenase [Nasonia vitripennis]	35.9 kDa
gi|156548942	XP_001607586	-28.71	-112.91	24.74	6	3	PREDICTED: hypothetical protein [Nasonia vitripennis]	22.0 kDa
gi|156551429	XP_001604269	-32.41	-113.78	8.31	6	3	PREDICTED: similar to gmp synthase [Nasonia vitripennis]	78.7 kDa
gi|156542436	XP_001599772	-32.47	-122.51	12.7	6	3	PREDICTED: similar to ENSANGP00000014344 [Nasonia vitripennis]	42.4 kDa
gi|156551934	XP_001607542	-36.27	-134.12	16.32	7	3	PREDICTED: hypothetical protein [Nasonia vitripennis]	36.4 kDa
gi|156549198	XP_001607824	-35	-139.66	33.53	6	3	PREDICTED: similar to glutathione S-transferase, partial [Nasonia vitripennis]	19.9 kDa
gi|156538074	XP_001607543	-47.12	-170.39	24.89	13	3	PREDICTED: similar to ENSANGP00000022132 [Nasonia vitripennis]	25.5 kDa
gi|156551051	XP_001605644	-44.33	-183.49	35.47	6	3	PREDICTED: similar to translationally controlled tumor protein [Nasonia vitripennis]	19.9 kDa
gi|156547504	XP_001602423	-44.16	-191.13	41.96	7	3	PREDICTED: similar to ribosomal protein P1 [Nasonia vitripennis]	11.4 kDa
gi|156554693	XP_001604994	-51.25	-194.96	11.53	8	3	PREDICTED: hypothetical protein [Nasonia vitripennis]	49.1 kDa
gi|156549032	XP_001607937	-48.53	-195.52	12.2	6	3	PREDICTED: similar to sn-glycerol-3-phosphate dehydrogenase [Nasonia vitripennis]	40.5 kDa
gi|156548392	XP_001603938	-49.02	-199	15.58	6	3	PREDICTED: similar to aldo-keto reductase [Nasonia vitripennis]	36.0 kDa
gi|156543677	XP_001605350	-75.04	-269.62	5.7	12	3	PREDICTED: similar to hydroxyacyl-coenzyme A dehydrogenase [Nasonia vitripennis]	82.1 kDa
gi|156553875	XP_001600932	-73.67	-299.62	15.78	8	3	PREDICTED: similar to 4-hydroxyphenylpyruvate dioxygenase [Nasonia vitripennis]	47.2 kDa
gi|156542024	XP_001599993	-73.67	-308.59	17.15	8	3	PREDICTED: similar to fk506-binding protein [Nasonia vitripennis]	26.9 kDa
gi|156540296	XP_001599931	-98.65	-420.06	29.82	9	3	PREDICTED: similar to putative elongation factor 1 beta [Nasonia vitripennis]	24.4 kDa
gi|156536891	XP_001607038	-106.67	-442.95	33.94	15	3	PREDICTED: similar to putative peptidyl-prolyl cis-trans isomerase isoform 1 [Nasonia vitripennis]	17.7 kDa
gi|156536889	XP_001607048	-106.67	-442.95	33.94	15	3	PREDICTED: similar to putative peptidyl-prolyl cis-trans isomerase isoform 2 [Nasonia vitripennis]	17.7 kDa
gi|156551075	XP_001602774	-648.02	-2928.69	6.24	9	3	PREDICTED: similar to ENSANGP00000016878 [Nasonia vitripennis]	92.3 kDa
gi|156552611	XP_001599434	-43.26	15.61	2.41	30	2	PREDICTED: similar to polyubiquitin [Nasonia vitripennis]	102.4 kDa
gi|156551219	XP_001602185	-2.42	-3.83	14.1	2	2	PREDICTED: similar to ribosomal protein S27a [Nasonia vitripennis]	17.9 kDa
gi|156539923	XP_001600340	-2.42	-4.24	17.19	2	2	PREDICTED: similar to putative ribosomal protein Ubq/L40e isoform 2 [Nasonia vitripennis]	14.7 kDa
gi|156539925	XP_001600310	-2.42	-4.24	17.19	2	2	PREDICTED: similar to putative ribosomal protein Ubq/L40e isoform 1 [Nasonia vitripennis]	14.7 kDa
gi|156547421	XP_001604560	-9.07	-4.28	2.47	5	2	PREDICTED: similar to laminin gamma 1 chain [Nasonia vitripennis]	179.2 kDa
gi|156552476	XP_001602780	-4.03	-8.14	4.65	2	2	PREDICTED: similar to chitinase 5 [Nasonia vitripennis]	61.0 kDa
gi|156542046	XP_001601390	-4.51	-8.58	10.3	3	2	PREDICTED: similar to S18e ribosomal protein [Nasonia vitripennis]	19.0 kDa
gi|156545144	XP_001602678	-5.89	-13.41	2.6	2	2	PREDICTED: similar to glycinamide ribonucleotide synthetase-aminoimidazole ribonucleotide synthetase-glycinamide ribonucleotide transformylase [Nasonia vitripennis]	111.7 kDa
gi|156540730	XP_001599042	-4.37	-14.5	21.13	2	2	PREDICTED: similar to conserved hypothetical protein [Nasonia vitripennis]	21.5 kDa
gi|156550388	XP_001599663	-4.75	-15.44	17.17	2	2	PREDICTED: similar to MPA3 allergen [Nasonia vitripennis]	24.9 kDa
gi|156554183	XP_001599986	-7.03	-16.41	5.57	3	2	PREDICTED: similar to phosphoglucose isomerase [Nasonia vitripennis]	62.2 kDa
gi|156555805	XP_001602443	-5.12	-16.56	12.12	2	2	PREDICTED: similar to peptidoglycan recognition protein-LC [Nasonia vitripennis]	22.1 kDa
gi|156546550	XP_001607558	-6.99	-17.75	12.3	4	2	PREDICTED: similar to MGC79752 protein [Nasonia vitripennis]	26.9 kDa
gi|156545547	XP_001605069	-5.48	-18.71	20.71	2	2	PREDICTED: similar to ribosomal protein L23 [Nasonia vitripennis]	14.8 kDa
gi|156547848	XP_001604320	-10.06	-33.08	3.4	2	2	PREDICTED: similar to ENSANGP00000012364 [Nasonia vitripennis]	119.6 kDa
gi|156538963	XP_001599832	-11.11	-33.13	24.27	6	2	PREDICTED: similar to histone H4 [Nasonia vitripennis]	11.4 kDa
gi|156541236	XP_001600969	-11.98	-33.65	13.38	5	2	PREDICTED: similar to microtubule-associated protein RP/EB family member 3 isoform 2 [Nasonia vitripennis]	31.7 kDa
gi|156541238	XP_001600919	-11.98	-34.24	14.29	5	2	PREDICTED: similar to microtubule-associated protein RP/EB family member 3 isoform 1 [Nasonia vitripennis]	29.9 kDa
gi|156554226	XP_001602522	-9.52	-35.12	8.67	2	2	PREDICTED: hypothetical protein [Nasonia vitripennis]	35.4 kDa
gi|156554809	XP_001606183	-12.33	-36.23	15.73	5	2	PREDICTED: similar to CRALBP [Nasonia vitripennis]	29.3 kDa
gi|156537672	XP_001607871	-10.14	-38.55	13.62	2	2	PREDICTED: similar to Chymotrypsin-2 (Chymotrypsin II) [Nasonia vitripennis]	35.5 kDa
gi|156536885	XP_001606843	-10.63	-38.57	11.81	2	2	PREDICTED: similar to phosphoglycerate kinase [Nasonia vitripennis]	44.5 kDa
gi|156551611	XP_001600560	-12.97	-38.97	19.42	7	2	PREDICTED: similar to histone [Nasonia vitripennis]	11.3 kDa
gi|156538437	XP_001606217	-12.25	-42.81	5.09	2	2	PREDICTED: similar to ENSANGP00000020237 [Nasonia vitripennis]	103.8 kDa
gi|156554667	XP_001605646	-10.37	-43.64	36.64	2	2	PREDICTED: similar to serine-type enodpeptidase, putative, partial [Nasonia vitripennis]	13.7 kDa
gi|156537033	XP_001601130	-15.56	-47.16	3.7	4	2	PREDICTED: similar to mCG14932 [Nasonia vitripennis]	72.5 kDa
gi|156543358	XP_001607969	-15.13	-48.14	6.21	5	2	PREDICTED: similar to CG31692-PB [Nasonia vitripennis]	36.9 kDa
gi|156538140	XP_001608258	-14.03	-49.13	9.01	3	2	PREDICTED: similar to mitochondrial processing peptidase beta subunit [Nasonia vitripennis]	53.4 kDa
gi|156553004	XP_001604357	-13.1	-52.43	18.79	2	2	PREDICTED: similar to late trypsin [Nasonia vitripennis]	31.6 kDa
gi|156553723	XP_001600828	-15.03	-54.03	10.18	3	2	PREDICTED: similar to GA19489-PA [Nasonia vitripennis]	53.8 kDa
gi|156544532	XP_001607694	-13.95	-54.7	10.98	2	2	PREDICTED: similar to acetoacetyl-CoA thiolase [Nasonia vitripennis]	43.5 kDa
gi|156553129	XP_001599839	-19.19	-58.37	3.55	6	2	PREDICTED: similar to eukaryotic translation initiation factor 4A [Nasonia vitripennis]	47.7 kDa
gi|156549304	XP_001600380	-18.3	-59.75	6.3	5	2	PREDICTED: hypothetical protein [Nasonia vitripennis]	46.8 kDa
gi|156537219	XP_001605059	-20.3	-60.48	0.88	4	2	PREDICTED: similar to fatty acid synthase [Nasonia vitripennis]	261.0 kDa
gi|156548972	XP_001607166	-22.29	-70.05	4.42	5	2	PREDICTED: similar to ENSANGP00000013147 [Nasonia vitripennis]	105.7 kDa
gi|156549724	XP_001605685	-25.48	-72.83	1.36	5	2	PREDICTED: similar to p270 [Nasonia vitripennis]	339.8 kDa
gi|156547850	XP_001604487	-19.69	-76.52	13.36	3	2	PREDICTED: similar to ribosomal protein L23Ae [Nasonia vitripennis]	26.7 kDa
gi|156538110	XP_001608212	-20.76	-79.5	13.27	5	2	PREDICTED: similar to alpha NAC [Nasonia vitripennis]	22.4 kDa
gi|156543734	XP_001607874	-20.91	-79.97	14.74	4	2	PREDICTED: similar to ribosomal protein L14 [Nasonia vitripennis]	18.1 kDa
gi|156543824	XP_001608101	-23.18	-80.3	11.49	5	2	PREDICTED: similar to isocitrate dehydrogenase [Nasonia vitripennis]	46.1 kDa
gi|156540986	XP_001600442	-22.46	-83.37	3.31	3	2	PREDICTED: similar to carboxypeptidase A [Nasonia vitripennis]	115.5 kDa
gi|156545368	XP_001606222	-26.99	-84.42	3.27	6	2	PREDICTED: similar to protease m1 zinc metalloprotease [Nasonia vitripennis]	104.3 kDa
gi|156550408	XP_001600105	-22.81	-87.94	6.86	3	2	PREDICTED: similar to transketolase [Nasonia vitripennis]	67.9 kDa
gi|156546090	XP_001601271	-24.33	-91.98	10.16	4	2	PREDICTED: similar to ENSANGP00000013071 [Nasonia vitripennis]	47.1 kDa
gi|156547355	XP_001602953	-23.37	-92.71	8.94	3	2	PREDICTED: similar to juvenile hormone epoxide hydrolase [Nasonia vitripennis]	53.7 kDa
gi|156543324	XP_001606290	-29.94	-97.37	4.24	9	2	PREDICTED: similar to beta-1 tubulin [Nasonia vitripennis]	50.2 kDa
gi|156552730	XP_001599502	-26.9	-98.57	7.04	4	2	PREDICTED: similar to zinc metalloprotease [Nasonia vitripennis]	84.5 kDa
gi|156548258	XP_001600152	-27.88	-98.74	8.2	7	2	PREDICTED: similar to receptor for activated protein kinase C-like [Nasonia vitripennis]	35.8 kDa
gi|156553020	XP_001604672	-27.97	-107.52	10.22	5	2	PREDICTED: similar to serine-type enodpeptidase, putative [Nasonia vitripennis]	30.4 kDa
gi|156537747	XP_001607992	-30.66	-109	8.94	6	2	PREDICTED: similar to ENSANGP00000014908 [Nasonia vitripennis]	54.3 kDa
gi|156542817	XP_001607939	-32.83	-110.1	4.58	7	2	PREDICTED: similar to heat shock cognate 70 protein [Nasonia vitripennis]	71.3 kDa
gi|156544938	XP_001607263	-27.85	-118.97	25.38	3	2	PREDICTED: similar to ribosomal protein S15A [Nasonia vitripennis]	14.7 kDa
gi|156544970	XP_001607855	-30.27	-120.7	14.42	5	2	PREDICTED: similar to glutathione-S-transferase-like protein [Nasonia vitripennis]	24.5 kDa
gi|156546522	XP_001606212	-31.92	-124.19	11.28	5	2	PREDICTED: similar to ENSANGP00000013285 [Nasonia vitripennis]	41.6 kDa
gi|156538825	XP_001607975	-38.76	-132.98	8.91	8	2	PREDICTED: similar to Leukotriene A4 hydrolase [Nasonia vitripennis]	70.4 kDa
gi|156545944	XP_001603380	-35.99	-133.82	4.56	6	2	PREDICTED: hypothetical protein [Nasonia vitripennis]	56.6 kDa
gi|156553196	XP_001599943	-33.43	-139.97	13.54	6	2	PREDICTED: similar to ENSANGP00000014836 [Nasonia vitripennis]	25.1 kDa
gi|156552404	XP_001600977	-39.93	-152.99	23.76	8	2	PREDICTED: similar to Glutathione S-transferase (GST class-sigma) (Major allergen Bla g 5) [Nasonia vitripennis]	22.7 kDa
gi|156546944	XP_001605124	-39.73	-166.04	24.29	6	2	PREDICTED: similar to ribosomal protein S12 [Nasonia vitripennis]	15.3 kDa
gi|156542504	XP_001600141	-38.55	-171.13	32.85	5	2	PREDICTED: similar to pupal cuticle protein 78E, putative, partial [Nasonia vitripennis]	14.5 kDa
gi|156550614	XP_001604362	-42.02	-175.69	8.29	4	2	PREDICTED: similar to metalloprotease [Nasonia vitripennis]	43.0 kDa
gi|156548582	XP_001607513	-52.1	-177.59	5.07	11	2	PREDICTED: similar to bifunctional purine biosynthesis protein [Nasonia vitripennis]	64.3 kDa
gi|156548092	XP_001606344	-47.95	-183.67	7.54	7	2	PREDICTED: similar to MGC115145 protein [Nasonia vitripennis]	56.6 kDa
gi|156553050	XP_001605179	-46.83	-189.9	21.23	8	2	PREDICTED: similar to GA19673-PA [Nasonia vitripennis]	15.8 kDa
gi|156548615	XP_001608103	-53.15	-223.82	13.33	8	2	PREDICTED: similar to CuZn superoxide dismutase [Nasonia vitripennis]	15.4 kDa
gi|156541092	XP_001600261	-58.18	-223.95	4.76	9	2	PREDICTED: similar to Tubulin, beta 2c isoform 2 [Nasonia vitripennis]	57.1 kDa
gi|156541090	XP_001600234	-58.18	-226.64	5.37	9	2	PREDICTED: similar to Tubulin, beta 2c isoform 1 [Nasonia vitripennis]	50.5 kDa
gi|156552988	XP_001604014	-63.49	-234.02	9.26	11	2	PREDICTED: similar to GA17761-PA [Nasonia vitripennis]	52.0 kDa
gi|156550105	XP_001605762	-53.07	-236.71	42.06	6	2	PREDICTED: similar to Endocuticle structural glycoprotein SgAbd-1 [Nasonia vitripennis]	13.5 kDa
gi|156540429	XP_001599280	-62.42	-245.13	7.29	10	2	PREDICTED: similar to ENSANGP00000022164 [Nasonia vitripennis]	34.8 kDa
gi|156537145	XP_001603591	-69.17	-258.37	3.99	11	2	PREDICTED: similar to Sorting and assembly machinery component 50 homolog (S. cerevisiae) [Nasonia vitripennis]	61.0 kDa
gi|156546898	XP_001599736	-104.43	-446.46	27.89	12	2	PREDICTED: similar to ribosomal protein S15 [Nasonia vitripennis]	16.9 kDa
gi|156546398	XP_001607045	-357.86	-1619.61	13.31	8	2	PREDICTED: similar to ENSANGP00000018364 [Nasonia vitripennis]	27.2 kDa
gi|156537438	XP_001606987	-2.46	6.27	0.64	2	1	PREDICTED: similar to CG34146-PA [Nasonia vitripennis]	217.2 kDa
gi|156543856	XP_001606820	-1.33	4.99	0.29	1	1	PREDICTED: similar to CG33715-PD [Nasonia vitripennis]	873.7 kDa
gi|156552079	XP_001604782	-1.05	4.59	0.67	1	1	PREDICTED: similar to viral A-type inclusion protein, putative [Nasonia vitripennis]	372.7 kDa
gi|156542556	XP_001599536	-1	3.95	1.01	1	1	PREDICTED: hypothetical protein [Nasonia vitripennis]	309.7 kDa
gi|156549477	XP_001604286	-1.32	3.71	0.68	1	1	PREDICTED: similar to dynein heavy chain isotype 1B [Nasonia vitripennis]	460.2 kDa
gi|156555306	XP_001603629	-1.27	3.1	0.58	1	1	PREDICTED: similar to laminin A chain, putative [Nasonia vitripennis]	400.2 kDa
gi|156548848	XP_001605970	-1	2.96	0.83	1	1	PREDICTED: similar to brefeldin a-inhibited guanine nucleotide-exchange protein [Nasonia vitripennis]	204.1 kDa
gi|156542377	XP_001600657	-1.05	2.86	1.53	1	1	PREDICTED: similar to structural maintenance of chromosomes smc2 [Nasonia vitripennis]	134.6 kDa
gi|156545311	XP_001605551	-1.05	2.66	1.53	1	1	PREDICTED: similar to ENSANGP00000023755 [Nasonia vitripennis]	179.3 kDa
gi|156544241	XP_001606829	-1.02	1.84	1.6	1	1	PREDICTED: similar to cullin 1 [Nasonia vitripennis]	93.8 kDa
gi|156543308	XP_001604619	-1.07	1.65	2.36	1	1	PREDICTED: similar to nuclear export factor CRM1 [Nasonia vitripennis]	122.3 kDa
gi|156555065	XP_001604078	-1.23	1.51	1.32	1	1	PREDICTED: hypothetical protein [Nasonia vitripennis]	106.4 kDa
gi|156552800	XP_001601124	-1.18	1.26	1.85	1	1	PREDICTED: similar to ENSANGP00000010886 [Nasonia vitripennis]	108.1 kDa
gi|156537986	XP_001608190	-1.2	1.12	3.2	1	1	PREDICTED: similar to replication factors MCM [Nasonia vitripennis]	98.6 kDa
gi|156538463	XP_001606569	-1.1	0.98	2.56	1	1	PREDICTED: similar to conserved hypothetical protein [Nasonia vitripennis]	84.8 kDa
gi|156548019	XP_001605625	-1.15	0.54	2.59	1	1	PREDICTED: similar to Sorting nexin 14 [Nasonia vitripennis]	86.9 kDa
gi|156550171	XP_001602512	-1.17	0.2	3.05	1	1	PREDICTED: similar to chaperonin [Nasonia vitripennis]	59.9 kDa
gi|156542807	XP_001607590	-1.34	0.14	2.46	1	1	PREDICTED: similar to importin beta-3 [Nasonia vitripennis]	122.8 kDa
gi|156551137	XP_001603917	-1	0.13	5.97	1	1	PREDICTED: hypothetical protein [Nasonia vitripennis]	40.2 kDa
gi|156549506	XP_001604802	-1.12	0.11	4.05	1	1	PREDICTED: similar to ENSANGP00000022450 [Nasonia vitripennis]	54.3 kDa
gi|156543945	XP_001607282	-1.02	0.11	6.65	1	1	PREDICTED: similar to CG13165-PA [Nasonia vitripennis]	51.0 kDa
gi|156541860	XP_001600145	-1.08	0.05	6.15	1	1	PREDICTED: similar to CG33949-PA [Nasonia vitripennis]	39.4 kDa
gi|156544088	XP_001603578	-1.26	0.02	3.11	1	1	PREDICTED: similar to Prolyl endopeptidase [Nasonia vitripennis]	79.7 kDa
gi|156547297	XP_001601486	-1.26	-0.01	3.03	1	1	PREDICTED: similar to ecotropic viral integration site [Nasonia vitripennis]	68.1 kDa
gi|156538315	XP_001604053	-1.18	-0.17	6.13	1	1	PREDICTED: similar to conserved hypothetical protein [Nasonia vitripennis]	52.1 kDa
gi|156544856	XP_001607043	-1.6	-0.33	1.11	1	1	PREDICTED: similar to cytochrome P450 [Nasonia vitripennis]	155.6 kDa
gi|156554459	XP_001601449	-1.13	-0.35	1.97	1	1	PREDICTED: similar to ENSANGP00000011707 [Nasonia vitripennis]	45.9 kDa
gi|156550697	XP_001607388	-1.85	-0.4	1.22	1	1	PREDICTED: similar to vitellogenin [Nasonia vitripennis]	202.7 kDa
gi|156542532	XP_001599934	-1.01	-0.41	4.53	1	1	PREDICTED: similar to anterior fat body protein [Nasonia vitripennis]	34.0 kDa
gi|156549706	XP_001605514	-1.13	-0.45	7.64	1	1	PREDICTED: similar to conserved hypothetical protein [Nasonia vitripennis]	44.8 kDa
gi|156537850	XP_001608094	-2.81	-0.5	2.54	2	1	PREDICTED: similar to CG11482-PA [Nasonia vitripennis]	76.1 kDa
gi|156553992	XP_001603280	-1.24	-0.73	6.88	1	1	PREDICTED: similar to ENSANGP00000014762 [Nasonia vitripennis]	45.8 kDa
gi|156551435	XP_001604367	-3.97	-0.75	0.92	2	1	PREDICTED: similar to ENSANGP00000000794 [Nasonia vitripennis]	228.0 kDa
gi|156545880	XP_001606582	-1.58	-0.87	2.72	1	1	PREDICTED: similar to prophenoloxidase [Nasonia vitripennis]	113.6 kDa
gi|156541490	XP_001600488	-1.27	-0.9	4.94	1	1	PREDICTED: similar to ENSANGP00000024127 [Nasonia vitripennis]	39.5 kDa
gi|156548682	XP_001602456	-1.04	-0.98	5.58	1	1	PREDICTED: similar to conserved hypothetical protein [Nasonia vitripennis]	29.9 kDa
gi|156554783	XP_001605978	-1.59	-1.01	2.71	1	1	PREDICTED: similar to translation initiation factor 2b, delta subunit [Nasonia vitripennis]	73.5 kDa
gi|156542327	XP_001599692	-1.48	-1.07	4.9	1	1	PREDICTED: similar to apoptosis antagonizing transcription factor [Nasonia vitripennis]	58.6 kDa
gi|156554914	XP_001606036	-1.53	-1.13	2.75	1	1	PREDICTED: similar to prophenoloxidase [Nasonia vitripennis]	79.3 kDa
gi|156545577	XP_001607678	-1.17	-1.3	9.23	1	1	PREDICTED: similar to heat shock protein 20.6 isoform 3 [Nasonia vitripennis]	22.3 kDa
gi|156553508	XP_001600858	-1.27	-1.34	4.11	1	1	PREDICTED: similar to MGC89016 protein [Nasonia vitripennis]	44.5 kDa
gi|156543547	XP_001603204	-1.31	-1.35	2.77	1	1	PREDICTED: similar to ENSANGP00000015958 [Nasonia vitripennis]	103.8 kDa
gi|156554880	XP_001606894	-1.4	-1.4	4.18	1	1	PREDICTED: similar to hagoromo [Nasonia vitripennis]	49.9 kDa
gi|156541004	XP_001602623	-1.5	-1.57	4.84	1	1	PREDICTED: similar to UDP-N-acetylglucosamine pyrophosphorylase [Nasonia vitripennis]	53.1 kDa
gi|156554116	XP_001602967	-1.44	-1.57	6.64	1	1	PREDICTED: similar to protein disulfide isomerase [Nasonia vitripennis]	47.9 kDa
gi|156543467	XP_001601451	-1.67	-1.61	1.37	1	1	PREDICTED: similar to DNA binding protein elf-1 [Nasonia vitripennis]	118.9 kDa
gi|156545575	XP_001607669	-1.17	-1.64	9.47	1	1	PREDICTED: similar to heat shock protein 20.6 isoform 1 [Nasonia vitripennis]	21.7 kDa
gi|156545579	XP_001607675	-1.17	-1.64	9.89	1	1	PREDICTED: similar to heat shock protein 20.6 isoform 2 [Nasonia vitripennis]	20.8 kDa
gi|156554986	XP_001602704	-1.91	-1.77	2.15	1	1	PREDICTED: similar to KLG [Nasonia vitripennis]	124.6 kDa
gi|156551407	XP_001603759	-1.5	-1.92	2.28	1	1	PREDICTED: similar to pickpocket 4 long form [Nasonia vitripennis]	50.5 kDa
gi|156542333	XP_001599828	-2.2	-2.18	1.74	1	1	PREDICTED: similar to bifunctional aminoacyl-tRNA synthetase [Nasonia vitripennis]	172.6 kDa
gi|156541696	XP_001603554	-4.51	-2.61	2.26	3	1	PREDICTED: hypothetical protein [Nasonia vitripennis]	94.7 kDa
gi|156539033	XP_001601766	-1.61	-2.67	7.09	1	1	PREDICTED: hypothetical protein, partial [Nasonia vitripennis]	33.2 kDa
gi|156543884	XP_001606965	-1.67	-2.8	3.37	1	1	PREDICTED: similar to conserved hypothetical protein [Nasonia vitripennis]	38.5 kDa
gi|156544684	XP_001605302	-1.87	-2.88	5.11	1	1	PREDICTED: similar to DEAH (Asp-Glu-Ala-His) box polypeptide 35 [Nasonia vitripennis]	76.6 kDa
gi|156538905	XP_001602010	-1.6	-3.07	3.23	1	1	PREDICTED: similar to teratocyte released chitinase, partial [Nasonia vitripennis]	34.8 kDa
gi|156554076	XP_001600035	-3.35	-3.19	2.5	2	1	PREDICTED: similar to neutral endopeptidase 24.11 [Nasonia vitripennis]	87.1 kDa
gi|156543778	XP_001606291	-1.67	-3.22	4.45	1	1	PREDICTED: similar to conserved hypothetical protein [Nasonia vitripennis]	33.1 kDa
gi|156538136	XP_001608256	-1.51	-3.3	8.12	1	1	PREDICTED: similar to proteasome 25 kDa subunit [Nasonia vitripennis]	25.9 kDa
gi|156550396	XP_001599791	-1.51	-3.45	10.86	1	1	PREDICTED: similar to ENSANGP00000006721 [Nasonia vitripennis]	28.4 kDa
gi|156539611	XP_001601127	-2.24	-3.48	1.69	1	1	PREDICTED: similar to retrotransposon protein, putative, unclassified [Nasonia vitripennis]	89.1 kDa
gi|156541060	XP_001602981	-2.02	-3.58	4.19	1	1	PREDICTED: similar to NADH-ubiquinone oxidoreductase [Nasonia vitripennis]	71.7 kDa
gi|156553016	XP_001604580	-1.72	-3.9	3.47	1	1	PREDICTED: similar to GA17770-PA [Nasonia vitripennis]	32.8 kDa
gi|156537283	XP_001605940	-1.86	-3.91	5.8	1	1	PREDICTED: similar to hsp70 binding protein [Nasonia vitripennis]	40.5 kDa
gi|156542606	XP_001604235	-2.75	-4	7.77	2	1	PREDICTED: hypothetical protein [Nasonia vitripennis]	44.8 kDa
gi|156552996	XP_001604225	-2.05	-4.05	2.4	1	1	PREDICTED: hypothetical protein [Nasonia vitripennis]	65.7 kDa
gi|156540417	XP_001602912	-2.19	-4.09	3.35	1	1	PREDICTED: similar to poly a polymerase [Nasonia vitripennis]	78.0 kDa
gi|156553749	XP_001601392	-1.8	-4.29	6.1	1	1	PREDICTED: similar to gamma-glutamyl hydrolase, putative [Nasonia vitripennis]	37.0 kDa
gi|156541114	XP_001601400	-2.37	-4.63	3.29	1	1	PREDICTED: similar to Methylcrotonoyl-Coenzyme A carboxylase 1 (alpha) [Nasonia vitripennis]	77.4 kDa
gi|156547540	XP_001607573	-2.02	-5.03	5.95	1	1	PREDICTED: similar to ribosomal protein L17 [Nasonia vitripennis]	21.3 kDa
gi|156551315	XP_001601678	-1.82	-5.04	11.59	1	1	PREDICTED: similar to conserved hypothetical protein [Nasonia vitripennis]	15.8 kDa
gi|156544600	XP_001603774	-1.71	-5.28	5.88	1	1	PREDICTED: hypothetical protein [Nasonia vitripennis]	15.1 kDa
gi|156553409	XP_001599017	-2.33	-5.75	5.54	1	1	PREDICTED: similar to CG12262-PA [Nasonia vitripennis]	45.2 kDa
gi|156553855	XP_001600269	-2.06	-5.82	8.51	1	1	PREDICTED: similar to ribosomal protein L22e [Nasonia vitripennis]	16.7 kDa
gi|156551914	XP_001607007	-2.49	-6.06	3.59	1	1	PREDICTED: similar to microfibrillar-associated protein, putative [Nasonia vitripennis]	45.2 kDa
gi|156553897	XP_001601352	-3.31	-6.47	0.83	1	1	PREDICTED: similar to spectrin [Nasonia vitripennis]	278.5 kDa
gi|156541248	XP_001600867	-2.2	-6.5	3.77	1	1	PREDICTED: similar to signal peptide peptidase [Nasonia vitripennis]	41.6 kDa
gi|156547512	XP_001604111	-4.27	-6.5	5.77	3	1	PREDICTED: similar to ribosomal protein S8 [Nasonia vitripennis]	23.9 kDa
gi|156551541	XP_001600683	-2.57	-6.86	4.01	1	1	PREDICTED: similar to ENSANGP00000018269 [Nasonia vitripennis]	61.1 kDa
gi|156553282	XP_001599651	-3.44	-7.15	7.02	2	1	PREDICTED: similar to ribosomal protein S3e [Nasonia vitripennis]	26.7 kDa
gi|156548632	XP_001608225	-2.39	-7.25	8.91	1	1	PREDICTED: similar to Glutathione S-transferase (GST class-sigma) (Major allergen Bla g 5) [Nasonia vitripennis]	22.6 kDa
gi|156552523	XP_001599341	-2.71	-7.27	3.09	1	1	PREDICTED: similar to actin-binding protein ipp [Nasonia vitripennis]	66.9 kDa
gi|156542478	XP_001599534	-2.59	-7.28	7.1	1	1	PREDICTED: similar to UPB1 protein, partial [Nasonia vitripennis]	40.9 kDa
gi|156540455	XP_001599637	-2.58	-7.37	7.65	1	1	PREDICTED: similar to defective proboscis extension response, putative [Nasonia vitripennis]	42.4 kDa
gi|156555350	XP_001604790	-2.75	-7.43	2.33	1	1	PREDICTED: similar to glutamate carboxypeptidase [Nasonia vitripennis]	57.5 kDa
gi|156548040	XP_001605871	-2.15	-7.69	19.82	1	1	PREDICTED: similar to BolA protein, putative [Nasonia vitripennis]	12.5 kDa
gi|156547988	XP_001605306	-2.99	-7.93	7.92	2	1	PREDICTED: hypothetical protein [Nasonia vitripennis]	11.3 kDa
gi|156547510	XP_001603936	-2.88	-7.98	3.56	1	1	PREDICTED: similar to 26S proteasome regulatory complex ATPase RPT4 [Nasonia vitripennis]	44.6 kDa
gi|156543348	XP_001607839	-2.25	-7.99	13.49	1	1	PREDICTED: similar to RH02823p [Nasonia vitripennis]	13.9 kDa
gi|156550791	XP_001607255	-2.91	-8.22	6.28	1	1	PREDICTED: similar to DnaJ homolog subfamily A member 1 isoform 2 [Nasonia vitripennis]	44.7 kDa
gi|156550793	XP_001607240	-2.91	-8.23	6.3	1	1	PREDICTED: similar to DnaJ homolog subfamily A member 1 isoform 1 [Nasonia vitripennis]	44.7 kDa
gi|156538965	XP_001599860	-3.12	-8.36	12.62	2	1	PREDICTED: similar to histone H4 [Nasonia vitripennis]	11.4 kDa
gi|156554138	XP_001599025	-2.37	-8.37	19.88	1	1	PREDICTED: similar to ATP synthase 1 [Nasonia vitripennis]	17.1 kDa
gi|156554908	XP_001603368	-3.28	-8.7	1.71	1	1	PREDICTED: similar to conserved hypothetical protein [Nasonia vitripennis]	66.1 kDa
gi|156553996	XP_001603331	-3.01	-8.72	2.48	1	1	PREDICTED: similar to ENSANGP00000022492 [Nasonia vitripennis]	52.7 kDa
gi|156537395	XP_001606769	-3.04	-8.78	4.23	1	1	PREDICTED: similar to Fumarate hydratase 1 [Nasonia vitripennis]	50.8 kDa
gi|156553206	XP_001599732	-3.12	-8.83	3.01	1	1	PREDICTED: similar to CG8983-PA [Nasonia vitripennis]	56.1 kDa
gi|156551732	XP_001599607	-3.06	-8.92	5.47	1	1	PREDICTED: similar to LD46760p [Nasonia vitripennis]	52.3 kDa
gi|156551988	XP_001602878	-3.22	-9.12	5.38	1	1	PREDICTED: similar to ENSANGP00000004677 [Nasonia vitripennis]	58.4 kDa
gi|156554505	XP_001605026	-5.65	-9.67	5.11	3	1	PREDICTED: similar to malic enzyme [Nasonia vitripennis]	67.6 kDa
gi|156547106	XP_001602650	-2.73	-10.24	24.51	1	1	PREDICTED: similar to thioredoxin-like protein, partial [Nasonia vitripennis]	11.5 kDa
gi|156538002	XP_001608200	-4.56	-10.44	3.69	2	1	PREDICTED: similar to carboxylesterase [Nasonia vitripennis]	61.7 kDa
gi|156538559	XP_001607423	-3.29	-10.71	9.35	1	1	PREDICTED: similar to CG6439-PA [Nasonia vitripennis]	38.6 kDa
gi|156553817	XP_001605674	-3.01	-10.8	9.92	1	1	PREDICTED: similar to ribosomal protein S20 [Nasonia vitripennis]	13.7 kDa
gi|156548988	XP_001607237	-4.64	-11.51	2.95	2	1	PREDICTED: similar to GH08974p [Nasonia vitripennis]	49.6 kDa
gi|156538224	XP_001602519	-4.03	-11.57	8.26	2	1	PREDICTED: similar to GA22042-PA [Nasonia vitripennis]	23.7 kDa
gi|156538907	XP_001602041	-4.64	-11.58	2.95	2	1	PREDICTED: similar to GH08974p [Nasonia vitripennis]	49.7 kDa
gi|156543770	XP_001606220	-3.52	-11.59	4.22	1	1	PREDICTED: similar to CG7422-PB [Nasonia vitripennis]	48.4 kDa
gi|156537105	XP_001602749	-4.64	-11.94	3	2	1	PREDICTED: similar to kynurenine aminotransferase [Nasonia vitripennis]	48.8 kDa
gi|156551364	XP_001602775	-3.7	-11.95	2.57	1	1	PREDICTED: similar to metalloprotease [Nasonia vitripennis]	48.3 kDa
gi|156551692	XP_001601820	-3.96	-12.05	3.85	1	1	PREDICTED: similar to dipeptidyl peptidase iii [Nasonia vitripennis]	82.0 kDa
gi|156553813	XP_001604886	-3.8	-12.26	3.97	1	1	PREDICTED: similar to 26S protease regulatory subunit 6a [Nasonia vitripennis]	47.7 kDa
gi|156547261	XP_001601960	-3.65	-12.29	5.15	1	1	PREDICTED: similar to cystathionine gamma-lyase [Nasonia vitripennis]	42.7 kDa
gi|156544263	XP_001607270	-3.6	-12.41	7.18	1	1	PREDICTED: similar to ribosomal protein L11 [Nasonia vitripennis]	22.2 kDa
gi|156551251	XP_001606776	-3.71	-12.6	8.28	1	1	PREDICTED: similar to uncharacterized conerved protein [Nasonia vitripennis]	35.8 kDa
gi|156540594	XP_001600266	-4.52	-12.86	3.94	2	1	PREDICTED: similar to RNA-binding protein musashi/mRNA cleavage and polyadenylation factor I complex subunit HRP1 [Nasonia vitripennis]	43.3 kDa
gi|156543378	XP_001599775	-3.52	-13.23	6.67	1	1	PREDICTED: similar to farnesoic acid o-methyltransferase-like isoform 1 protein, partial [Nasonia vitripennis]	32.7 kDa
gi|156550476	XP_001602398	-3.56	-13.24	5.73	1	1	PREDICTED: similar to signal sequence receptor beta subunit [Nasonia vitripennis]	21.6 kDa
gi|156543427	XP_001600788	-6.74	-14.28	2.4	3	1	PREDICTED: similar to conserved hypothetical protein [Nasonia vitripennis]	58.5 kDa
gi|156553460	XP_001604505	-5.14	-14.88	8	2	1	PREDICTED: similar to translation initiation factor eif-2b [Nasonia vitripennis]	38.1 kDa
gi|156552169	XP_001605876	-5.72	-15.19	2.8	2	1	PREDICTED: similar to transcriptional adaptor 3 [Nasonia vitripennis]	52.2 kDa
gi|156553310	XP_001599735	-5.59	-15.19	4.73	2	1	PREDICTED: similar to tryptophan oxygenase [Nasonia vitripennis]	48.5 kDa
gi|156543328	XP_001606958	-3.74	-15.56	18.46	1	1	PREDICTED: similar to ribosomal protein S28e-like protein [Nasonia vitripennis]	7.4 kDa
gi|156549296	XP_001600207	-7.36	-15.59	3.96	3	1	PREDICTED: similar to eukaryotic initiation factor 4B protein [Nasonia vitripennis]	62.5 kDa
gi|156554441	XP_001600505	-4.93	-16.47	3.89	1	1	PREDICTED: similar to transferrin [Nasonia vitripennis]	76.8 kDa
gi|156549170	XP_001607740	-5.33	-16.85	1.72	1	1	PREDICTED: similar to ENSANGP00000016875 [Nasonia vitripennis]	201.0 kDa
gi|156552868	XP_001600528	-4.46	-16.98	8.06	1	1	PREDICTED: similar to oxidoreductase [Nasonia vitripennis]	26.8 kDa
gi|156555807	XP_001602825	-4.34	-17.02	11.79	1	1	PREDICTED: similar to conserved hypothetical protein [Nasonia vitripennis]	21.1 kDa
gi|156546152	XP_001603117	-5.62	-17.12	3.24	2	1	PREDICTED: similar to serine protease [Nasonia vitripennis]	71.2 kDa
gi|156549782	XP_001606327	-4.64	-17.3	5.94	1	1	PREDICTED: similar to ENSANGP00000029416 [Nasonia vitripennis]	33.0 kDa
gi|156537506	XP_001607401	-5.19	-17.47	3.2	1	1	PREDICTED: similar to ENSANGP00000021292 [Nasonia vitripennis]	97.6 kDa
gi|156538350	XP_001604685	-5.09	-17.81	2.77	1	1	PREDICTED: similar to V-ATPase subunit A [Nasonia vitripennis]	67.9 kDa
gi|156545754	XP_001605427	-5.59	-17.85	7.69	2	1	PREDICTED: similar to short-chain dehydrogenase/reductase [Nasonia vitripennis]	27.6 kDa
gi|156542863	XP_001599933	-5.36	-19.91	4.58	1	1	PREDICTED: similar to ribosomal protein S4e [Nasonia vitripennis]	29.6 kDa
gi|156546942	XP_001604670	-5.36	-20.3	21.69	2	1	PREDICTED: similar to ribosomal protein S21 [Nasonia vitripennis]	9.2 kDa
gi|156554371	XP_001604098	-11.01	-20.41	2.84	6	1	PREDICTED: similar to SHQ1 homolog (S. cerevisiae) [Nasonia vitripennis]	60.1 kDa
gi|156553644	XP_001600436	-7.31	-21	1.99	2	1	PREDICTED: similar to heat shock protein [Nasonia vitripennis]	80.2 kDa
gi|156548580	XP_001607505	-6.34	-21.58	13.57	2	1	PREDICTED: similar to vacuolar sorting protein [Nasonia vitripennis]	24.4 kDa
gi|156548613	XP_001608082	-6.34	-21.73	4.1	2	1	PREDICTED: similar to putative 40S ribosomal protein SA [Nasonia vitripennis]	34.4 kDa
gi|156549959	XP_001603273	-5.9	-22.15	4.68	1	1	PREDICTED: similar to Argininosuccinate synthetase 1 [Nasonia vitripennis]	48.1 kDa
gi|156542281	XP_001601633	-5.7	-22.79	10.87	1	1	PREDICTED: similar to putative chemosensory protein 1 [Nasonia vitripennis]	16.1 kDa
gi|156544986	XP_001607995	-10.12	-23.74	1.01	3	1	PREDICTED: similar to clathrin heavy chain [Nasonia vitripennis]	192.2 kDa
gi|156538631	XP_001607652	-6.81	-23.77	1.59	1	1	PREDICTED: similar to UDP-glucose glycoprotein:glucosyltransferase [Nasonia vitripennis]	180.1 kDa
gi|156549853	XP_001606880	-21.31	-24.08	3.22	15	1	PREDICTED: similar to IP11896p [Nasonia vitripennis]	51.4 kDa
gi|156544189	XP_001606559	-5.93	-24.3	13.2	1	1	PREDICTED: similar to conserved hypothetical protein [Nasonia vitripennis]	22.6 kDa
gi|156541938	XP_001601226	-6.86	-25.08	3.03	1	1	PREDICTED: similar to acyl-coa dehydrogenase [Nasonia vitripennis]	102.1 kDa
gi|156554581	XP_001602523	-7.34	-25.29	6.78	2	1	PREDICTED: similar to fibroinase [Nasonia vitripennis]	37.9 kDa
gi|156547775	XP_001605936	-6.63	-25.45	4.17	1	1	PREDICTED: similar to esterase [Nasonia vitripennis]	61.6 kDa
gi|156553324	XP_001601425	-7.38	-25.61	8.87	2	1	PREDICTED: similar to proteasome beta-subunit [Nasonia vitripennis]	27.9 kDa
gi|156540229	XP_001601924	-6.77	-25.81	9.31	1	1	PREDICTED: similar to chaperonin [Nasonia vitripennis]	46.9 kDa
gi|156551555	XP_001601024	-6.97	-26.15	3.29	1	1	PREDICTED: similar to conserved hypothetical protein [Nasonia vitripennis]	71.7 kDa
gi|156545611	XP_001604870	-7.25	-26.72	7.33	2	1	PREDICTED: similar to lectin 4 C-type lectin [Nasonia vitripennis]	26.5 kDa
gi|156554635	XP_001605155	-7.34	-27.22	3.02	1	1	PREDICTED: similar to translation initiation factor 3, subunit S8, putative [Nasonia vitripennis]	96.4 kDa
gi|156547043	XP_001601273	-7.47	-28.61	3.08	1	1	PREDICTED: similar to GM01289p [Nasonia vitripennis]	65.6 kDa
gi|156554296	XP_001602465	-7	-28.89	9.93	1	1	PREDICTED: similar to S14e ribosomal protein [Nasonia vitripennis]	16.2 kDa
gi|156545525	XP_001607207	-7.7	-29.16	2.48	1	1	PREDICTED: similar to conserved hypothetical protein [Nasonia vitripennis]	86.0 kDa
gi|156543362	XP_001608132	-8.11	-29.66	12.08	2	1	PREDICTED: similar to phospholipid-hydroperoxide glutathione peroxidase [Nasonia vitripennis]	23.4 kDa
gi|156548256	XP_001607280	-7.32	-30.25	8.28	1	1	PREDICTED: similar to calponin/transgelin [Nasonia vitripennis]	19.1 kDa
gi|156541600	XP_001600671	-7.86	-31.31	4.57	1	1	PREDICTED: similar to low-density lipoprotein receptor (ldl) [Nasonia vitripennis]	49.0 kDa
gi|156540453	XP_001599385	-7.77	-32.14	10.82	1	1	PREDICTED: similar to glucosamine-6-phosphate N-acetyltransferase [Nasonia vitripennis]	21.7 kDa
gi|156551722	XP_001603196	-7.59	-32.3	16.03	1	1	PREDICTED: similar to ENSANGP00000017620 [Nasonia vitripennis]	14.6 kDa
gi|156537036	XP_001601257	-11.51	-33.32	2.25	4	1	PREDICTED: similar to high-affinity Na+-dependent glutamate transporter [Nasonia vitripennis]	58.4 kDa
gi|156548948	XP_001607032	-9.44	-34.24	8.38	2	1	PREDICTED: similar to CG9149-PA [Nasonia vitripennis]	41.2 kDa
gi|156543140	XP_001607772	-10.99	-34.96	2.14	3	1	PREDICTED: similar to phosphoribosylaminoimidazole carboxylase [Nasonia vitripennis]	46.7 kDa
gi|156550446	XP_001600840	-8.83	-35.07	4.09	1	1	PREDICTED: similar to ENSANGP00000029545 [Nasonia vitripennis]	65.5 kDa
gi|156543768	XP_001606199	-8.83	-35.13	3.53	1	1	PREDICTED: similar to UDP-glucose pyrophosphorylase [Nasonia vitripennis]	57.6 kDa
gi|156542837	XP_001599773	-10.48	-35.53	2.13	2	1	PREDICTED: similar to heat shock protein 70 [Nasonia vitripennis]	82.8 kDa
gi|156549469	XP_001606417	-11.49	-35.66	3.57	3	1	PREDICTED: similar to cytochrome P450 monooxygenase [Nasonia vitripennis]	63.5 kDa
gi|156542030	XP_001600728	-8.27	-35.73	12.79	2	1	PREDICTED: hypothetical protein [Nasonia vitripennis]	10.0 kDa
gi|156551599	XP_001602488	-8.6	-36.01	9.19	1	1	PREDICTED: similar to serine-type enodpeptidase, putative [Nasonia vitripennis]	29.4 kDa
gi|156543973	XP_001604951	-10.48	-36.24	2.5	2	1	PREDICTED: similar to heat shock protein Hsp70 [Nasonia vitripennis]	70.9 kDa
gi|156537666	XP_001607862	-9.38	-36.25	6.05	2	1	PREDICTED: similar to Chymotrypsin-2 (Chymotrypsin II) [Nasonia vitripennis]	27.3 kDa
gi|156547889	XP_001608044	-10.48	-36.46	2.48	2	1	PREDICTED: similar to heat shock cognate 70 protein [Nasonia vitripennis]	70.6 kDa
gi|156547293	XP_001606673	-10.96	-36.77	3.33	3	1	PREDICTED: similar to ADP/ATP translocase [Nasonia vitripennis]	32.6 kDa
gi|156551884	XP_001605470	-9.88	-37.59	6.93	2	1	PREDICTED: similar to glutathione S-transferase isoform 2 [Nasonia vitripennis]	23.6 kDa
gi|156551886	XP_001605456	-9.88	-37.59	6.93	2	1	PREDICTED: similar to glutathione S-transferase isoform 1 [Nasonia vitripennis]	23.6 kDa
gi|156554552	XP_001605564	-12.08	-38.15	10.07	4	1	PREDICTED: similar to transmembrane protein, putative [Nasonia vitripennis]	33.9 kDa
gi|156548254	XP_001607274	-10.02	-38.76	8.37	2	1	PREDICTED: similar to muscular protein 20 [Nasonia vitripennis]	22.7 kDa
gi|156551167	XP_001604410	-15.83	-40.23	2.4	5	1	PREDICTED: similar to glycosyltransferase [Nasonia vitripennis]	109.4 kDa
gi|156552786	XP_001600182	-12.92	-42.09	1.95	3	1	PREDICTED: similar to RE11240p [Nasonia vitripennis]	68.8 kDa
gi|156553114	XP_001600151	-11.27	-42.66	3.94	2	1	PREDICTED: similar to prophenoloxidase activating factor [Nasonia vitripennis]	46.9 kDa
gi|156552022	XP_001603702	-13.61	-42.94	2.5	3	1	PREDICTED: similar to lysosomal alpha-mannosidase (mannosidase alpha class 2b member 1) [Nasonia vitripennis]	114.4 kDa
gi|156552848	XP_001600075	-13.87	-42.98	3.61	4	1	PREDICTED: similar to cystathionine beta-synthase [Nasonia vitripennis]	54.9 kDa
gi|156550390	XP_001599689	-13.53	-44.24	10.47	5	1	PREDICTED: similar to MPA3 allergen [Nasonia vitripennis]	28.0 kDa
gi|156548829	XP_001605497	-13.78	-44.34	2.04	3	1	PREDICTED: similar to ENSANGP00000022801 [Nasonia vitripennis]	92.6 kDa
gi|156538713	XP_001607816	-11.46	-44.7	6.3	2	1	PREDICTED: similar to mitochondrial ATP synthase b chain [Nasonia vitripennis]	27.4 kDa
gi|156555273	XP_001603203	-12	-44.72	5.7	2	1	PREDICTED: similar to Ruvbl1 protein [Nasonia vitripennis]	50.4 kDa
gi|156542422	XP_001601414	-10.91	-45	7.71	1	1	PREDICTED: similar to catalase [Nasonia vitripennis]	50.2 kDa
gi|156541150	XP_001601398	-12	-48.68	8.85	3	1	PREDICTED: similar to 60S acidic ribosomal protein P2 [Nasonia vitripennis]	11.7 kDa
gi|156546791	XP_001607354	-13.64	-48.91	9.05	4	1	PREDICTED: similar to putative ferritin 2 [Nasonia vitripennis]	25.0 kDa
gi|156555652	XP_001603746	-14.52	-50.29	4.81	3	1	PREDICTED: similar to nucleolar KKE/D repeat protein; DmNOP56 [Nasonia vitripennis]	57.9 kDa
gi|156551710	XP_001600532	-12.91	-54.33	13.79	2	1	PREDICTED: hypothetical protein [Nasonia vitripennis]	12.7 kDa
gi|156551650	XP_001600620	-14.37	-56.83	8.2	2	1	PREDICTED: similar to Phosphoserine aminotransferase 1 [Nasonia vitripennis]	40.5 kDa
gi|156541018	XP_001602925	-15.17	-57.95	7.19	3	1	PREDICTED: similar to ENSANGP00000014264 [Nasonia vitripennis]	34.9 kDa
gi|156552410	XP_001600268	-15.59	-58.86	7.47	3	1	PREDICTED: similar to d-amino acid oxidase [Nasonia vitripennis]	30.9 kDa
gi|156537801	XP_001608062	-15.95	-59.48	4.41	3	1	PREDICTED: similar to carboxypeptidase A [Nasonia vitripennis]	48.6 kDa
gi|156553185	XP_001600020	-13.9	-61.02	14.79	1	1	PREDICTED: similar to heat shock protein 1 [Nasonia vitripennis]	19.2 kDa
gi|156540043	XP_001600192	-14.34	-61.38	16.42	2	1	PREDICTED: similar to calreticulin, partial [Nasonia vitripennis]	15.8 kDa
gi|156537922	XP_001608147	-18.11	-61.95	3.37	4	1	PREDICTED: similar to GA18703-PA [Nasonia vitripennis]	61.4 kDa
gi|156548795	XP_001605557	-18.78	-62.88	2.68	4	1	PREDICTED: similar to ENSANGP00000010003 [Nasonia vitripennis]	73.4 kDa
gi|156539800	XP_001600669	-15.85	-65.27	6.77	2	1	PREDICTED: similar to calreticulin, partial [Nasonia vitripennis]	31.1 kDa
gi|156550342	XP_001606676	-17.02	-68.23	4.94	2	1	PREDICTED: similar to ATP-dependent RNA helicase [Nasonia vitripennis]	48.6 kDa
gi|156550340	XP_001606535	-17.02	-68.23	4.94	2	1	PREDICTED: similar to ATP-dependent RNA helicase [Nasonia vitripennis]	48.8 kDa
gi|156546018	XP_001607980	-17.02	-69.21	7.5	3	1	PREDICTED: similar to translation initiation factor 5a isoform 3 [Nasonia vitripennis]	17.7 kDa
gi|156546014	XP_001607976	-17.02	-69.21	7.5	3	1	PREDICTED: similar to translation initiation factor 5a isoform 2 [Nasonia vitripennis]	17.7 kDa
gi|156546016	XP_001607974	-17.02	-69.21	7.5	3	1	PREDICTED: similar to translation initiation factor 5a isoform 1 [Nasonia vitripennis]	17.7 kDa
gi|156543199	XP_001606262	-25.47	-72.61	1.78	6	1	PREDICTED: similar to Ca/calmodulin-dependent protein kinase phosphatase-N [Nasonia vitripennis]	206.2 kDa
gi|156547253	XP_001601340	-20.83	-73.75	8.52	5	1	PREDICTED: similar to 3-hydroxyacyl-coa dehyrogenase [Nasonia vitripennis]	35.7 kDa
gi|156542763	XP_001602492	-19.62	-74.28	6.76	5	1	PREDICTED: similar to actin-depolymerizing factor 4 [Nasonia vitripennis]	16.9 kDa
gi|156544011	XP_001607865	-19.26	-77.11	9.54	3	1	PREDICTED: similar to porin [Nasonia vitripennis]	30.2 kDa
gi|156538629	XP_001607645	-22.02	-78.77	5.8	5	1	PREDICTED: hypothetical protein [Nasonia vitripennis]	47.4 kDa
gi|156545551	XP_001605446	-20.87	-79.86	5.64	4	1	PREDICTED: similar to conserved hypothetical protein [Nasonia vitripennis]	35.6 kDa
gi|156552665	XP_001599764	-18.61	-81.07	9.93	2	1	PREDICTED: similar to nucleoplasmin-like protein [Nasonia vitripennis]	15.6 kDa
gi|156542371	XP_001600567	-20.53	-85.44	9.07	2	1	PREDICTED: similar to aldo-keto reductase [Nasonia vitripennis]	39.9 kDa
gi|156552609	XP_001599093	-21.17	-87.85	16.79	3	1	PREDICTED: similar to S17e ribosomal protein [Nasonia vitripennis]	15.3 kDa
gi|156538004	XP_001608201	-22.59	-89.21	4.99	3	1	PREDICTED: similar to ubiquinol-cytochrome c reductase core protein II [Nasonia vitripennis]	47.0 kDa
gi|156545150	XP_001602794	-27.92	-93.06	3.66	6	1	PREDICTED: similar to CG4170-PA [Nasonia vitripennis]	49.5 kDa
gi|156540213	XP_001601921	-27.27	-93.48	7.79	7	1	PREDICTED: similar to ENSANGP00000011972 [Nasonia vitripennis]	35.0 kDa
gi|156547465	XP_001605336	-23.76	-95.3	4.82	3	1	PREDICTED: similar to alpha-tubulin [Nasonia vitripennis]	47.8 kDa
gi|156549030	XP_001607373	-27.76	-112.42	3.34	3	1	PREDICTED: similar to glycerol-3-phosphate dehydrogenase [Nasonia vitripennis]	46.2 kDa
gi|156548610	XP_001607910	-31.53	-134.78	10.91	3	1	PREDICTED: similar to peroxiredoxin [Nasonia vitripennis]	24.8 kDa
gi|156536899	XP_001607323	-36.18	-148.21	11.83	5	1	PREDICTED: similar to putative beta-NAC-like protein [Nasonia vitripennis]	20.1 kDa
gi|156552627	XP_001600555	-38.74	-148.98	4.79	6	1	PREDICTED: similar to phenylalanine hydroxylase [Nasonia vitripennis]	52.2 kDa
gi|156553110	XP_001599656	-42.68	-159.51	3.64	6	1	PREDICTED: similar to cxpwmw03 [Nasonia vitripennis]	80.2 kDa
gi|156549973	XP_001603697	-39.53	-165.6	12.19	4	1	PREDICTED: similar to putative alcohol dehydrogenase [Nasonia vitripennis]	31.2 kDa
gi|156545814	XP_001607760	-44.63	-174.37	3.78	6	1	PREDICTED: similar to GTP binding protein [Nasonia vitripennis]	44.7 kDa
gi|156553474	XP_001600043	-56.55	-202.36	5	11	1	PREDICTED: similar to histone H2B [Nasonia vitripennis]	31.7 kDa
gi|156542899	XP_001601265	-48.49	-206.66	17.35	6	1	PREDICTED: similar to ENSANGP00000012664 [Nasonia vitripennis]	11.0 kDa
gi|156538969	XP_001602196	-56.55	-208.27	6.47	11	1	PREDICTED: similar to histone H2B, partial [Nasonia vitripennis]	24.9 kDa
gi|156544948	XP_001607509	-56.55	-211.6	5.42	11	1	PREDICTED: similar to putative Rho1 [Nasonia vitripennis]	31.2 kDa
gi|156545382	XP_001607906	-56.55	-225.45	12.1	11	1	PREDICTED: similar to histone H2B [Nasonia vitripennis]	13.7 kDa
gi|156549202	XP_001608234	-56.55	-225.45	12.1	11	1	PREDICTED: similar to histone H2B [Nasonia vitripennis]	13.7 kDa
gi|156545386	XP_001607945	-56.55	-225.45	12.1	11	1	PREDICTED: similar to histone H2B [Nasonia vitripennis]	13.7 kDa
gi|156548974	XP_001607725	-56.55	-225.45	12.1	11	1	PREDICTED: similar to histone H2B [Nasonia vitripennis]	13.7 kDa
gi|156537632	XP_001608226	-56.55	-225.45	12.1	11	1	PREDICTED: similar to histone H2B [Nasonia vitripennis]	13.7 kDa
gi|156548874	XP_001607191	-56.55	-225.45	12.1	11	1	PREDICTED: similar to histone H2B [Nasonia vitripennis]	13.7 kDa
gi|156538971	XP_001599909	-56.55	-225.45	12.1	11	1	PREDICTED: similar to histone H2B [Nasonia vitripennis]	13.7 kDa
gi|156537898	XP_001608287	-56.55	-225.45	12.1	11	1	PREDICTED: similar to histone H2B [Nasonia vitripennis]	13.7 kDa
gi|156545108	XP_001603608	-56.55	-225.45	12.1	11	1	PREDICTED: similar to histone H2B [Nasonia vitripennis]	13.7 kDa
gi|156545307	XP_001607523	-56.55	-225.45	12.1	11	1	PREDICTED: similar to histone H2B [Nasonia vitripennis]	13.7 kDa
gi|156545384	XP_001607918	-56.55	-225.45	12.1	11	1	PREDICTED: similar to histone H2B [Nasonia vitripennis]	13.7 kDa
gi|156548904	XP_001606665	-55.3	-227.98	14.56	10	1	PREDICTED: similar to histone H2B [Nasonia vitripennis]	11.7 kDa
gi|156548064	XP_001606152	-63.88	-239.68	2.35	11	1	PREDICTED: similar to serpin [Nasonia vitripennis]	47.9 kDa
gi|156551940	XP_001607748	-65.74	-266.57	13.59	10	1	PREDICTED: similar to putative muscular protein 20 [Nasonia vitripennis]	20.4 kDa
gi|156542502	XP_001600091	-66.39	-289.83	17.76	8	1	PREDICTED: similar to pupal cuticle protein 78E, putative [Nasonia vitripennis]	16.5 kDa
gi|156552677	XP_001599303	-83.36	-343.4	6.11	11	1	PREDICTED: similar to eukaryotic translation initiation factor 3 subunit 5 epsilon-like protein [Nasonia vitripennis]	32.6 kDa
gi|156553657	XP_001600604	-87.43	-372.34	11.33	7	1	PREDICTED: similar to ENSANGP00000012072 [Nasonia vitripennis]	29.2 kDa
gi|156552724	XP_001599431	-125.49	-502.24	3.68	12	1	PREDICTED: similar to zinc metalloprotease [Nasonia vitripennis]	90.3 kDa
gi|156552722	XP_001599405	-125.49	-502.97	4.01	12	1	PREDICTED: similar to zinc metalloprotease [Nasonia vitripennis]	83.4 kDa

## Sheet: DP6
gi#	Accession	log.E-Value Sum	Protein Score	%Coverage	#Pep.	#Unique Pep.	Protein Description	MW
gi|156542452	XP_001599110	-17501	-72591.5	64.97	1401	42	PREDICTED: similar to high Glx storage protein [Nasonia vitripennis]	102.6 kDa
gi|156538313	XP_001604024	-1048.51	-3912.88	16.63	98	40	PREDICTED: similar to apolipophorin [Nasonia vitripennis]	374.8 kDa
gi|156545565	XP_001607012	-7285.51	-25421.7	50.72	1333	39	PREDICTED: similar to hexamerin 2 [Nasonia vitripennis]	83.7 kDa
gi|156542989	XP_001603025	-1.#J	-1.#J	53.4	812	34	PREDICTED: similar to high Glx storage protein [Nasonia vitripennis]	108.2 kDa
gi|156544337	XP_001607303	-969.69	-3598.9	23.83	101	31	PREDICTED: similar to CG17927-PF [Nasonia vitripennis]	224.5 kDa
gi|156545718	XP_001604915	-833.31	-2925.81	33.76	146	23	PREDICTED: similar to hexamerin [Nasonia vitripennis]	94.8 kDa
gi|156537243	XP_001605359	-774.34	-3178.61	37.7	71	19	PREDICTED: similar to protein disulfide isomerase [Nasonia vitripennis]	55.7 kDa
gi|156545567	XP_001607029	-1717.43	-7165.75	36.02	126	17	PREDICTED: similar to hexamerin [Nasonia vitripennis]	81.6 kDa
gi|156549563	XP_001607238	-170.25	-573.96	35.16	37	14	PREDICTED: similar to ENSANGP00000024604 isoform 1 [Nasonia vitripennis]	59.1 kDa
gi|156549565	XP_001607253	-170.25	-572.67	34.78	37	14	PREDICTED: similar to ENSANGP00000024604 isoform 2 [Nasonia vitripennis]	59.7 kDa
gi|156541054	XP_001601342	-1316.79	-5683.14	54.52	85	13	PREDICTED: similar to RE12057p isoform 1 [Nasonia vitripennis]	41.8 kDa
gi|156546948	XP_001605607	-588.18	-2194.12	39.26	95	12	PREDICTED: similar to elongation factor 1-alpha isoform 1 [Nasonia vitripennis]	50.2 kDa
gi|156542175	XP_001600960	-1315.73	-5682.73	48.94	84	12	PREDICTED: similar to RE12057p isoform 1 [Nasonia vitripennis]	41.8 kDa
gi|156546950	XP_001605623	-579.29	-2175.54	39.58	93	11	PREDICTED: similar to elongation factor 1-alpha isoform 2 [Nasonia vitripennis]	46.7 kDa
gi|156542476	XP_001599672	-804.58	-3359.94	50.52	72	11	PREDICTED: similar to ENSANGP00000014344 [Nasonia vitripennis]	43.9 kDa
gi|156541056	XP_001601369	-1220.88	-5355.7	52.2	63	11	PREDICTED: similar to RE12057p isoform 2 [Nasonia vitripennis]	37.8 kDa
gi|156554900	XP_001600911	-1300.69	-5640.35	41.76	78	10	PREDICTED: similar to RE12057p isoform 1 [Nasonia vitripennis]	41.8 kDa
gi|156542177	XP_001600991	-1219.81	-5355.03	46.04	62	10	PREDICTED: similar to RE12057p isoform 2 [Nasonia vitripennis]	37.8 kDa
gi|156554898	XP_001600934	-1300.69	-5640.35	41.76	78	10	PREDICTED: similar to RE12057p isoform 2 [Nasonia vitripennis]	41.8 kDa
gi|156548062	XP_001606111	-333.58	-1254.68	26.27	51	10	PREDICTED: similar to serpin 6 [Nasonia vitripennis]	58.9 kDa
gi|156550530	XP_001602460	-142.22	-417.37	21.9	36	10	PREDICTED: similar to translation elongation factor 2 [Nasonia vitripennis]	96.5 kDa
gi|156538985	XP_001600854	-479.32	-2068.54	36.2	34	9	PREDICTED: similar to beta-1 tubulin, partial [Nasonia vitripennis]	37.3 kDa
gi|156545557	XP_001606463	-104.81	-356.43	18.97	21	9	PREDICTED: similar to ENSANGP00000012893 [Nasonia vitripennis]	72.7 kDa
gi|156554292	XP_001601054	-158.8	-574.06	26.58	34	9	PREDICTED: similar to putative fructose 1,6-bisphosphate aldolase [Nasonia vitripennis]	39.4 kDa
gi|156554902	XP_001601057	-1217.8	-5354.21	42.82	60	9	PREDICTED: similar to RE12057p isoform 3 [Nasonia vitripennis]	37.9 kDa
gi|156551117	XP_001601759	-234.78	-864.45	29.88	42	8	PREDICTED: similar to aldehyde dehydrogenase [Nasonia vitripennis]	51.2 kDa
gi|156544486	XP_001602474	-204.03	-827.1	55.26	33	8	PREDICTED: similar to apolipophorin-III [Nasonia vitripennis]	20.8 kDa
gi|156541962	XP_001600045	-438.06	-1863.1	23.95	27	8	PREDICTED: similar to ENSANGP00000014839 [Nasonia vitripennis]	60.6 kDa
gi|156547891	XP_001608047	-231.36	-967.71	57.58	30	8	PREDICTED: similar to fatty acid binding protein isoform 1 [Nasonia vitripennis]	15.0 kDa
gi|156544504	XP_001605191	-77.35	-221.87	14.69	21	8	PREDICTED: similar to heat shock protein 90 [Nasonia vitripennis]	82.1 kDa
gi|156548942	XP_001607586	-95.56	-340.3	47.42	31	7	PREDICTED: hypothetical protein [Nasonia vitripennis]	22.0 kDa
gi|156545978	XP_001607122	-104.52	-398.31	25.35	17	7	PREDICTED: similar to arginine kinase-like protein [Nasonia vitripennis]	39.9 kDa
gi|156542436	XP_001599772	-78.36	-288.84	27.78	16	7	PREDICTED: similar to ENSANGP00000014344 [Nasonia vitripennis]	42.4 kDa
gi|156547893	XP_001608053	-205.14	-858.97	49.24	26	7	PREDICTED: similar to fatty acid binding protein isoform 2 [Nasonia vitripennis]	15.1 kDa
gi|156547538	XP_001607474	-176.89	-704.75	32.04	25	7	PREDICTED: similar to glyceraldehyde-3-phosphate dehydrogenase [Nasonia vitripennis]	35.6 kDa
gi|156543677	XP_001605350	-128.44	-426.87	15.78	26	7	PREDICTED: similar to hydroxyacyl-coenzyme A dehydrogenase [Nasonia vitripennis]	82.1 kDa
gi|156553655	XP_001600547	-118.01	-440.86	31.38	23	7	PREDICTED: similar to mitochondrial malate dehydrogenase [Nasonia vitripennis]	35.9 kDa
gi|156549941	XP_001602718	-210.68	-826.22	44.74	37	7	PREDICTED: similar to putative alcohol dehydrogenase [Nasonia vitripennis]	29.2 kDa
gi|156555799	XP_001601504	-1102.24	-4914.69	26.06	36	7	PREDICTED: similar to RE12057p isoform 1 [Nasonia vitripennis]	41.8 kDa
gi|156555801	XP_001601591	-1102.24	-4923.65	28.74	36	7	PREDICTED: similar to RE12057p isoform 2 [Nasonia vitripennis]	37.9 kDa
gi|156542010	XP_001599268	-89.86	-278.3	10.6	19	7	PREDICTED: similar to standard paramyosin [Nasonia vitripennis]	102.4 kDa
gi|156549304	XP_001600380	-64.67	-214.48	17.19	17	6	PREDICTED: hypothetical protein [Nasonia vitripennis]	46.8 kDa
gi|156543342	XP_001607606	-28.87	-89.9	29.11	10	6	PREDICTED: similar to acidic p0 ribosomal protein [Nasonia vitripennis]	34.0 kDa
gi|156548568	XP_001606870	-185.1	-700.44	21.78	33	6	PREDICTED: similar to alpha tubulin [Nasonia vitripennis]	50.0 kDa
gi|156547846	XP_001604160	-214.84	-822.86	21.78	36	6	PREDICTED: similar to alpha tubulin [Nasonia vitripennis]	50.0 kDa
gi|156548149	XP_001607699	-214.84	-823.58	21.78	36	6	PREDICTED: similar to alpha tubulin [Nasonia vitripennis]	50.0 kDa
gi|156553669	XP_001602360	-385.81	-1709.5	16.37	15	6	PREDICTED: similar to beta-tubulin [Nasonia vitripennis]	49.9 kDa
gi|156548582	XP_001607513	-56.38	-174.62	16.89	15	6	PREDICTED: similar to bifunctional purine biosynthesis protein [Nasonia vitripennis]	64.3 kDa
gi|156546036	XP_001600126	-71.68	-253.54	18.58	14	6	PREDICTED: similar to CG4898-PB [Nasonia vitripennis]	39.3 kDa
gi|156542191	XP_001600781	-50.32	-140.12	13.23	17	6	PREDICTED: similar to Elongation factor 1-alpha (EF-1-alpha) [Nasonia vitripennis]	50.6 kDa
gi|156544237	XP_001606813	-61.05	-207.9	14.32	15	6	PREDICTED: similar to ENSANGP00000029516 [Nasonia vitripennis]	48.2 kDa
gi|156543557	XP_001603460	-82.27	-302.68	14.73	17	6	PREDICTED: similar to GA17427-PA [Nasonia vitripennis]	51.1 kDa
gi|156542817	XP_001607939	-69.65	-250.34	14.81	12	6	PREDICTED: similar to heat shock cognate 70 protein [Nasonia vitripennis]	71.3 kDa
gi|156540342	XP_001599230	-31.38	-111.42	51.46	11	6	PREDICTED: similar to histone H4 [Nasonia vitripennis]	11.4 kDa
gi|156544925	XP_001603581	-31.38	-111.42	51.46	11	6	PREDICTED: similar to histone H4 [Nasonia vitripennis]	11.4 kDa
gi|156548636	XP_001608236	-31.38	-111.42	51.46	11	6	PREDICTED: similar to histone H4 [Nasonia vitripennis]	11.4 kDa
gi|156548574	XP_001607199	-31.38	-111.42	51.46	11	6	PREDICTED: similar to histone H4 [Nasonia vitripennis]	11.4 kDa
gi|156544974	XP_001607894	-31.38	-111.42	51.46	11	6	PREDICTED: similar to histone H4 [Nasonia vitripennis]	11.4 kDa
gi|156536987	XP_001608282	-31.38	-111.42	51.46	11	6	PREDICTED: similar to histone H4 [Nasonia vitripennis]	11.4 kDa
gi|156548578	XP_001607366	-31.38	-111.42	51.46	11	6	PREDICTED: similar to histone H4 [Nasonia vitripennis]	11.4 kDa
gi|156553446	XP_001599471	-31.38	-111.42	51.46	11	6	PREDICTED: similar to histone H4 [Nasonia vitripennis]	11.4 kDa
gi|156536993	XP_001608285	-31.38	-111.42	51.46	11	6	PREDICTED: similar to histone H4 [Nasonia vitripennis]	11.4 kDa
gi|156542193	XP_001599856	-569.88	-1901.37	7.01	98	6	PREDICTED: similar to major allergen Bla g 1.02 [Nasonia vitripennis]	159.5 kDa
gi|156552724	XP_001599431	-145.55	-556.77	13.07	18	6	PREDICTED: similar to zinc metalloprotease [Nasonia vitripennis]	90.3 kDa
gi|156545944	XP_001603380	-67.42	-257.29	10.46	10	5	PREDICTED: hypothetical protein [Nasonia vitripennis]	56.6 kDa
gi|156553875	XP_001600932	-83.72	-336.01	23.3	10	5	PREDICTED: similar to 4-hydroxyphenylpyruvate dioxygenase [Nasonia vitripennis]	47.2 kDa
gi|156541821	XP_001600369	-22.62	-63.65	10.33	8	5	PREDICTED: similar to beta-hexosaminidase b [Nasonia vitripennis]	61.0 kDa
gi|156542548	XP_001599282	-27.51	-87.45	12.15	6	5	PREDICTED: similar to CG5520-PA [Nasonia vitripennis]	90.6 kDa
gi|156548902	XP_001606654	-285.58	-1084.92	13.84	42	5	PREDICTED: similar to cytochrome P450 CYP4AB1 [Nasonia vitripennis]	54.8 kDa
gi|156551491	XP_001605187	-106.71	-350.95	8.71	25	5	PREDICTED: similar to ENSANGP00000011975 [Nasonia vitripennis]	75.1 kDa
gi|156551075	XP_001602774	-69.96	-260.44	10.62	10	5	PREDICTED: similar to ENSANGP00000016878 [Nasonia vitripennis]	92.3 kDa
gi|156540429	XP_001599280	-45.85	-160.35	21.58	12	5	PREDICTED: similar to ENSANGP00000022164 [Nasonia vitripennis]	34.8 kDa
gi|156544972	XP_001607891	-182.94	-750.6	52.8	31	5	PREDICTED: similar to ENSANGP00000031916 [Nasonia vitripennis]	13.4 kDa
gi|156539625	XP_001599199	-245.71	-1024.87	52.8	36	5	PREDICTED: similar to ENSANGP00000031916 [Nasonia vitripennis]	13.4 kDa
gi|156536997	XP_001608288	-247.4	-1029.68	53.23	37	5	PREDICTED: similar to ENSANGP00000031916 [Nasonia vitripennis]	13.4 kDa
gi|156536941	XP_001608227	-247.4	-1029.68	52.8	37	5	PREDICTED: similar to ENSANGP00000031916 [Nasonia vitripennis]	13.4 kDa
gi|156548594	XP_001607717	-247.4	-1029.68	52.8	37	5	PREDICTED: similar to ENSANGP00000031916 [Nasonia vitripennis]	13.4 kDa
gi|156544982	XP_001607947	-247.4	-1029.68	52.8	37	5	PREDICTED: similar to ENSANGP00000031916 [Nasonia vitripennis]	13.4 kDa
gi|156549200	XP_001607826	-247.4	-1029.68	52.8	37	5	PREDICTED: similar to ENSANGP00000031916 [Nasonia vitripennis]	13.4 kDa
gi|156544960	XP_001607585	-273.64	-1147.55	52.8	38	5	PREDICTED: similar to ENSANGP00000031916 [Nasonia vitripennis]	13.4 kDa
gi|156539055	XP_001599770	-296.59	-1235.47	52.8	44	5	PREDICTED: similar to ENSANGP00000031916 [Nasonia vitripennis]	13.4 kDa
gi|156544915	XP_001600014	-247.88	-1019.19	48.53	38	5	PREDICTED: similar to ENSANGP00000031917 [Nasonia vitripennis]	14.6 kDa
gi|156548876	XP_001606447	-298.03	-1231.3	50.38	45	5	PREDICTED: similar to ENSANGP00000032064 [Nasonia vitripennis]	14.2 kDa
gi|156546548	XP_001607360	-80.94	-343.79	34.42	8	5	PREDICTED: similar to ferritin [Nasonia vitripennis]	24.1 kDa
gi|156544964	XP_001607554	-22.93	-81.55	51.46	8	5	PREDICTED: similar to histone H4 [Nasonia vitripennis]	11.4 kDa
gi|156538963	XP_001599832	-25.09	-91.48	51.46	8	5	PREDICTED: similar to histone H4 [Nasonia vitripennis]	11.4 kDa
gi|156544980	XP_001607925	-26.62	-92.53	41.75	10	5	PREDICTED: similar to histone H4 [Nasonia vitripennis]	11.4 kDa
gi|156544962	XP_001607557	-25.65	-94.07	51.46	8	5	PREDICTED: similar to histone H4 [Nasonia vitripennis]	11.4 kDa
gi|156552551	XP_001599009	-27.16	-94.11	41.75	10	5	PREDICTED: similar to histone H4 [Nasonia vitripennis]	11.4 kDa
gi|156545368	XP_001606222	-54.37	-177.3	10.02	11	5	PREDICTED: similar to protease m1 zinc metalloprotease [Nasonia vitripennis]	104.3 kDa
gi|156549032	XP_001607937	-73.99	-275.46	18.16	14	5	PREDICTED: similar to sn-glycerol-3-phosphate dehydrogenase [Nasonia vitripennis]	40.5 kDa
gi|156536927	XP_001608110	-30.44	-112.37	23.92	7	4	PREDICTED: similar to 3-hydroxyacyl-CoA dehydrogenase type II isoform 1 [Nasonia vitripennis]	26.9 kDa
gi|156536929	XP_001608111	-30.44	-112.18	23.46	7	4	PREDICTED: similar to 3-hydroxyacyl-CoA dehydrogenase type II isoform 2 [Nasonia vitripennis]	27.4 kDa
gi|156541819	XP_001600338	-21.23	-62.06	8.3	7	4	PREDICTED: similar to beta-hexosaminidase b [Nasonia vitripennis]	56.0 kDa
gi|156537668	XP_001607866	-60.69	-240.45	24.21	11	4	PREDICTED: similar to Chymotrypsin-2 (Chymotrypsin II) [Nasonia vitripennis]	27.3 kDa
gi|156540730	XP_001599042	-82.98	-300.29	36.08	29	4	PREDICTED: similar to conserved hypothetical protein [Nasonia vitripennis]	21.5 kDa
gi|156548615	XP_001608103	-37.54	-157.16	37.33	6	4	PREDICTED: similar to CuZn superoxide dismutase [Nasonia vitripennis]	15.4 kDa
gi|156552049	XP_001603900	-41.92	-158.99	38.62	16	4	PREDICTED: similar to ENSANGP00000019735 [Nasonia vitripennis]	15.7 kDa
gi|156544978	XP_001607931	-230.95	-959.86	29.6	35	4	PREDICTED: similar to ENSANGP00000031916 [Nasonia vitripennis]	13.4 kDa
gi|156545301	XP_001605462	-245.22	-1033.75	41.11	40	4	PREDICTED: similar to ENSANGP00000031916 [Nasonia vitripennis]	9.6 kDa
gi|156544929	XP_001603712	-252.19	-1051.75	52.8	37	4	PREDICTED: similar to ENSANGP00000031916 [Nasonia vitripennis]	13.4 kDa
gi|156545305	XP_001605491	-267.4	-1128.75	41.11	43	4	PREDICTED: similar to ENSANGP00000031916 [Nasonia vitripennis]	9.6 kDa
gi|156537219	XP_001605059	-37.19	-97.03	2.29	9	4	PREDICTED: similar to fatty acid synthase [Nasonia vitripennis]	261.0 kDa
gi|156553723	XP_001600828	-13.23	-40.63	16.44	4	4	PREDICTED: similar to GA19489-PA [Nasonia vitripennis]	53.8 kDa
gi|156551429	XP_001604269	-39.51	-140.6	11.13	7	4	PREDICTED: similar to gmp synthase [Nasonia vitripennis]	78.7 kDa
gi|156551611	XP_001600560	-26.26	-94.25	38.83	9	4	PREDICTED: similar to histone [Nasonia vitripennis]	11.3 kDa
gi|156553444	XP_001599591	-18.93	-66.11	40.78	7	4	PREDICTED: similar to histone H4 [Nasonia vitripennis]	11.4 kDa
gi|156543824	XP_001608101	-56.31	-211.66	16.87	9	4	PREDICTED: similar to isocitrate dehydrogenase [Nasonia vitripennis]	46.1 kDa
gi|156548276	XP_001604985	-56.05	-237.03	35.68	6	4	PREDICTED: similar to lethal(2)essential for life protein, l2efl [Nasonia vitripennis]	23.0 kDa
gi|156537033	XP_001601130	-33.7	-93.92	7.25	10	4	PREDICTED: similar to mCG14932 [Nasonia vitripennis]	72.5 kDa
gi|156541477	XP_001600227	-25.58	-80.42	7.99	6	4	PREDICTED: similar to phosphoenolpyruvate carboxykinase [Nasonia vitripennis]	80.9 kDa
gi|156548926	XP_001606826	-215.74	-876.9	22.22	25	4	PREDICTED: similar to putative carboxypeptidase A-like [Nasonia vitripennis]	46.5 kDa
gi|156536891	XP_001607038	-105.71	-444.94	34.55	13	4	PREDICTED: similar to putative peptidyl-prolyl cis-trans isomerase isoform 1 [Nasonia vitripennis]	17.7 kDa
gi|156536889	XP_001607048	-105.71	-444.94	34.55	13	4	PREDICTED: similar to putative peptidyl-prolyl cis-trans isomerase isoform 2 [Nasonia vitripennis]	17.7 kDa
gi|156536931	XP_001608129	-230.55	-930.26	31.09	32	4	PREDICTED: similar to ribosomal protein S7 [Nasonia vitripennis]	22.3 kDa
gi|156550408	XP_001600105	-25.61	-95.13	13.4	4	4	PREDICTED: similar to transketolase [Nasonia vitripennis]	67.9 kDa
gi|156545922	XP_001599003	-24.58	-88.11	21.83	5	4	PREDICTED: similar to tropomyosin 1 [Nasonia vitripennis]	32.3 kDa
gi|156552722	XP_001599405	-141.98	-553.91	10.79	16	4	PREDICTED: similar to zinc metalloprotease [Nasonia vitripennis]	83.4 kDa
gi|156551934	XP_001607542	-59.62	-227.52	16.32	10	3	PREDICTED: hypothetical protein [Nasonia vitripennis]	36.4 kDa
gi|156554693	XP_001604994	-79.79	-300.78	13.88	13	3	PREDICTED: hypothetical protein [Nasonia vitripennis]	49.1 kDa
gi|156544532	XP_001607694	-17.95	-68.33	15.12	3	3	PREDICTED: similar to acetoacetyl-CoA thiolase [Nasonia vitripennis]	43.5 kDa
gi|156542763	XP_001602492	-17.39	-67.23	29.05	4	3	PREDICTED: similar to actin-depolymerizing factor 4 [Nasonia vitripennis]	16.9 kDa
gi|156547293	XP_001606673	-27.44	-98.97	8.33	6	3	PREDICTED: similar to ADP/ATP translocase [Nasonia vitripennis]	32.6 kDa
gi|156542554	XP_001599353	-43.92	-169.35	14.46	7	3	PREDICTED: similar to aminoacylase, putative [Nasonia vitripennis]	45.4 kDa
gi|156547751	XP_001605713	-54.87	-200.05	9.7	9	3	PREDICTED: similar to CG5397-PA [Nasonia vitripennis]	80.4 kDa
gi|156554809	XP_001606183	-105.3	-419.2	15.73	16	3	PREDICTED: similar to CRALBP [Nasonia vitripennis]	29.3 kDa
gi|156553110	XP_001599656	-51.4	-181.16	9.04	9	3	PREDICTED: similar to cxpwmw03 [Nasonia vitripennis]	80.2 kDa
gi|156555286	XP_001605157	-22.94	-79.16	12.05	6	3	PREDICTED: similar to cytosolic malate dehydrogenase [Nasonia vitripennis]	35.9 kDa
gi|156550103	XP_001605745	-70.74	-310.78	28.77	9	3	PREDICTED: similar to Endocuticle structural glycoprotein SgAbd-1 [Nasonia vitripennis]	15.6 kDa
gi|156550396	XP_001599791	-102.34	-379.87	22.1	26	3	PREDICTED: similar to ENSANGP00000006721 [Nasonia vitripennis]	28.4 kDa
gi|156546090	XP_001601271	-22	-71.2	13.63	6	3	PREDICTED: similar to ENSANGP00000013071 [Nasonia vitripennis]	47.1 kDa
gi|156546522	XP_001606212	-20.3	-75.21	15.79	4	3	PREDICTED: similar to ENSANGP00000013285 [Nasonia vitripennis]	41.6 kDa
gi|156553196	XP_001599943	-69.68	-286.01	19.21	15	3	PREDICTED: similar to ENSANGP00000014836 [Nasonia vitripennis]	25.1 kDa
gi|156538074	XP_001607543	-47.16	-177.74	32.07	11	3	PREDICTED: similar to ENSANGP00000022132 [Nasonia vitripennis]	25.5 kDa
gi|156553129	XP_001599839	-27.27	-95.58	6.62	6	3	PREDICTED: similar to eukaryotic translation initiation factor 4A [Nasonia vitripennis]	47.7 kDa
gi|156542024	XP_001599993	-48.49	-204.14	17.15	5	3	PREDICTED: similar to fk506-binding protein [Nasonia vitripennis]	26.9 kDa
gi|156555350	XP_001604790	-24.95	-83.5	9.71	6	3	PREDICTED: similar to glutamate carboxypeptidase [Nasonia vitripennis]	57.5 kDa
gi|156549198	XP_001607824	-47.67	-194.45	33.53	7	3	PREDICTED: similar to glutathione S-transferase, partial [Nasonia vitripennis]	19.9 kDa
gi|156551732	XP_001599607	-23.09	-70.09	9.85	7	3	PREDICTED: similar to LD46760p [Nasonia vitripennis]	52.3 kDa
gi|156550388	XP_001599663	-43.77	-169.4	17.17	10	3	PREDICTED: similar to MPA3 allergen [Nasonia vitripennis]	24.9 kDa
gi|156555903	XP_001599313	-76.69	-325.7	29.73	9	3	PREDICTED: similar to myosin 2 light chain [Nasonia vitripennis]	16.5 kDa
gi|156538132	XP_001608247	-35.5	-139.17	27.19	6	3	PREDICTED: similar to myosin light chain isoform 1 [Nasonia vitripennis]	24.3 kDa
gi|156538130	XP_001608248	-35.5	-139.17	27.19	6	3	PREDICTED: similar to myosin light chain isoform 2 [Nasonia vitripennis]	24.3 kDa
gi|156552665	XP_001599764	-35.48	-149.42	20.57	6	3	PREDICTED: similar to nucleoplasmin-like protein [Nasonia vitripennis]	15.6 kDa
gi|156545932	XP_001601068	-91.09	-351.39	19.4	22	3	PREDICTED: similar to odorant-binding protein 1 [Nasonia vitripennis]	14.5 kDa
gi|156543140	XP_001607772	-24.1	-79.66	8.31	6	3	PREDICTED: similar to phosphoribosylaminoimidazole carboxylase [Nasonia vitripennis]	46.7 kDa
gi|156540296	XP_001599931	-14.77	-56.6	29.82	3	3	PREDICTED: similar to putative elongation factor 1 beta [Nasonia vitripennis]	24.4 kDa
gi|156548258	XP_001600152	-17.38	-54.63	11.04	6	3	PREDICTED: similar to receptor for activated protein kinase C-like [Nasonia vitripennis]	35.8 kDa
gi|156544034	XP_001600115	-46.31	-156.37	14.56	10	3	PREDICTED: similar to ribosomal protein L3 [Nasonia vitripennis]	47.5 kDa
gi|156536919	XP_001608023	-48.74	-177.19	12.99	8	3	PREDICTED: similar to ribosomal protein L4 [Nasonia vitripennis]	48.3 kDa
gi|156547504	XP_001602423	-98.07	-434.11	41.96	10	3	PREDICTED: similar to ribosomal protein P1 [Nasonia vitripennis]	11.4 kDa
gi|156544938	XP_001607263	-45.58	-178.94	25.38	10	3	PREDICTED: similar to ribosomal protein S15A [Nasonia vitripennis]	14.7 kDa
gi|156553282	XP_001599651	-14.53	-49.51	23.55	4	3	PREDICTED: similar to ribosomal protein S3e [Nasonia vitripennis]	26.7 kDa
gi|156549869	XP_001599602	-11.51	-38.4	24.2	4	3	PREDICTED: similar to S10e ribosomal protein [Nasonia vitripennis]	17.7 kDa
gi|156554667	XP_001605646	-110.63	-462.1	37.4	23	3	PREDICTED: similar to serine-type enodpeptidase, putative, partial [Nasonia vitripennis]	13.7 kDa
gi|156551982	XP_001601109	-18.9	-57.88	11.06	5	3	PREDICTED: similar to troponin T [Nasonia vitripennis]	48.3 kDa
gi|156538350	XP_001604685	-30.54	-106.86	7.99	6	3	PREDICTED: similar to V-ATPase subunit A [Nasonia vitripennis]	67.9 kDa
gi|156539999	XP_001598993	-30.41	-123.38	12.02	5	2	PREDICTED: hypothetical protein [Nasonia vitripennis]	21.3 kDa
gi|156547253	XP_001601340	-17.89	-69.08	11.99	3	2	PREDICTED: similar to 3-hydroxyacyl-coa dehyrogenase [Nasonia vitripennis]	35.7 kDa
gi|156548392	XP_001603938	-33.06	-129.95	10.9	5	2	PREDICTED: similar to aldo-keto reductase [Nasonia vitripennis]	36.0 kDa
gi|156538110	XP_001608212	-8.16	-31.15	13.27	2	2	PREDICTED: similar to alpha NAC [Nasonia vitripennis]	22.4 kDa
gi|156542532	XP_001599934	-17.23	-62.33	5.5	4	2	PREDICTED: similar to anterior fat body protein [Nasonia vitripennis]	34.0 kDa
gi|156554138	XP_001599025	-3.25	-9.84	29.81	2	2	PREDICTED: similar to ATP synthase 1 [Nasonia vitripennis]	17.1 kDa
gi|156550342	XP_001606676	-11.26	-36.67	9.41	3	2	PREDICTED: similar to ATP-dependent RNA helicase [Nasonia vitripennis]	48.6 kDa
gi|156543324	XP_001606290	-20.37	-66.8	4.24	6	2	PREDICTED: similar to beta-1 tubulin [Nasonia vitripennis]	50.2 kDa
gi|156540043	XP_001600192	-43.02	-184.17	35.07	6	2	PREDICTED: similar to calreticulin, partial [Nasonia vitripennis]	15.8 kDa
gi|156539800	XP_001600669	-46.25	-185.96	14.66	7	2	PREDICTED: similar to calreticulin, partial [Nasonia vitripennis]	31.1 kDa
gi|156543358	XP_001607969	-95.14	-377.88	6.21	14	2	PREDICTED: similar to CG31692-PB [Nasonia vitripennis]	36.9 kDa
gi|156553206	XP_001599732	-4.38	-9.05	6.43	2	2	PREDICTED: similar to CG8983-PA [Nasonia vitripennis]	56.1 kDa
gi|156550171	XP_001602512	-16.42	-47.64	6.64	5	2	PREDICTED: similar to chaperonin [Nasonia vitripennis]	59.9 kDa
gi|156544229	XP_001606909	-25.92	-96.28	11.86	7	2	PREDICTED: similar to chymotrypsin [Nasonia vitripennis]	27.3 kDa
gi|156537672	XP_001607871	-40.25	-156.79	8.67	7	2	PREDICTED: similar to Chymotrypsin-2 (Chymotrypsin II) [Nasonia vitripennis]	35.5 kDa
gi|156544986	XP_001607995	-8.37	-8.04	2.26	4	2	PREDICTED: similar to clathrin heavy chain [Nasonia vitripennis]	192.2 kDa
gi|156552398	XP_001600211	-28.67	-110.06	13.88	7	2	PREDICTED: similar to conserved hypothetical protein [Nasonia vitripennis]	23.2 kDa
gi|156547120	XP_001602894	-18.5	-70.23	21.88	4	2	PREDICTED: similar to cuticle protein LCP65Ac [Nasonia vitripennis]	28.6 kDa
gi|156549469	XP_001606417	-32.66	-104.41	8.02	8	2	PREDICTED: similar to cytochrome P450 monooxygenase [Nasonia vitripennis]	63.5 kDa
gi|156543370	XP_001608218	-39.05	-166.99	13.83	3	2	PREDICTED: similar to electron-transfer-flavoprotein beta polypeptide [Nasonia vitripennis]	27.3 kDa
gi|156548795	XP_001605557	-22.51	-80.07	4.72	4	2	PREDICTED: similar to ENSANGP00000010003 [Nasonia vitripennis]	73.4 kDa
gi|156551487	XP_001605133	-21.04	-78.32	12.73	5	2	PREDICTED: similar to ENSANGP00000010625 [Nasonia vitripennis]	29.8 kDa
gi|156547848	XP_001604320	-4.25	-6.3	2.58	2	2	PREDICTED: similar to ENSANGP00000012364 [Nasonia vitripennis]	119.6 kDa
gi|156548972	XP_001607166	-34.98	-122.01	4.42	6	2	PREDICTED: similar to ENSANGP00000013147 [Nasonia vitripennis]	105.7 kDa
gi|156537747	XP_001607992	-17.07	-62.52	8.94	3	2	PREDICTED: similar to ENSANGP00000014908 [Nasonia vitripennis]	54.3 kDa
gi|156546398	XP_001607045	-71.66	-294.52	13.31	10	2	PREDICTED: similar to ENSANGP00000018364 [Nasonia vitripennis]	27.2 kDa
gi|156538068	XP_001607498	-27.16	-113.15	14.34	3	2	PREDICTED: similar to ENSANGP00000022464 [Nasonia vitripennis]	29.8 kDa
gi|156548829	XP_001605497	-24.42	-67.83	4.32	7	2	PREDICTED: similar to ENSANGP00000022801 [Nasonia vitripennis]	92.6 kDa
gi|156539967	XP_001599698	-23.2	-82.47	11.25	7	2	PREDICTED: similar to GA14756-PA [Nasonia vitripennis]	26.1 kDa
gi|156549040	XP_001607408	-2.48	-0.19	7.43	2	2	PREDICTED: similar to GA15723-PA [Nasonia vitripennis]	77.9 kDa
gi|156552988	XP_001604014	-78.76	-299.01	9.26	12	2	PREDICTED: similar to GA17761-PA [Nasonia vitripennis]	52.0 kDa
gi|156537922	XP_001608147	-30.27	-101.88	8.7	7	2	PREDICTED: similar to GA18703-PA [Nasonia vitripennis]	61.4 kDa
gi|156553050	XP_001605179	-31.78	-127.03	21.23	6	2	PREDICTED: similar to GA19673-PA [Nasonia vitripennis]	15.8 kDa
gi|156555513	XP_001604555	-19.84	-55.83	1.92	4	2	PREDICTED: similar to GA21164-PA [Nasonia vitripennis]	332.2 kDa
gi|156548988	XP_001607237	-10.98	-35.77	6.8	3	2	PREDICTED: similar to GH08974p [Nasonia vitripennis]	49.6 kDa
gi|156538907	XP_001602041	-10.98	-35.87	6.8	3	2	PREDICTED: similar to GH08974p [Nasonia vitripennis]	49.7 kDa
gi|156555785	XP_001603238	-14.18	-50.18	7.22	3	2	PREDICTED: similar to GH08974p [Nasonia vitripennis]	51.3 kDa
gi|156552404	XP_001600977	-38.24	-141.33	23.76	9	2	PREDICTED: similar to Glutathione S-transferase (GST class-sigma) (Major allergen Bla g 5) [Nasonia vitripennis]	22.7 kDa
gi|156551886	XP_001605456	-13.76	-51.52	13.86	3	2	PREDICTED: similar to glutathione S-transferase isoform 1 [Nasonia vitripennis]	23.6 kDa
gi|156551884	XP_001605470	-13.76	-51.52	13.86	3	2	PREDICTED: similar to glutathione S-transferase isoform 2 [Nasonia vitripennis]	23.6 kDa
gi|156544970	XP_001607855	-35.69	-141.91	14.42	6	2	PREDICTED: similar to glutathione-S-transferase-like protein [Nasonia vitripennis]	24.5 kDa
gi|156545144	XP_001602678	-14.7	-53.98	3.76	2	2	PREDICTED: similar to glycinamide ribonucleotide synthetase-aminoimidazole ribonucleotide synthetase-glycinamide ribonucleotide transformylase [Nasonia vitripennis]	111.7 kDa
gi|156547889	XP_001608044	-18.29	-60.66	4.34	4	2	PREDICTED: similar to heat shock cognate 70 protein [Nasonia vitripennis]	70.6 kDa
gi|156545575	XP_001607669	-4.49	-13.2	17.89	2	2	PREDICTED: similar to heat shock protein 20.6 isoform 1 [Nasonia vitripennis]	21.7 kDa
gi|156545579	XP_001607675	-4.49	-13.2	18.68	2	2	PREDICTED: similar to heat shock protein 20.6 isoform 2 [Nasonia vitripennis]	20.8 kDa
gi|156545577	XP_001607678	-4.49	-12.53	17.44	2	2	PREDICTED: similar to heat shock protein 20.6 isoform 3 [Nasonia vitripennis]	22.3 kDa
gi|156538965	XP_001599860	-5.96	-21.45	30.1	2	2	PREDICTED: similar to histone H4 [Nasonia vitripennis]	11.4 kDa
gi|156540778	XP_001599305	-5.81	-11.76	8.7	3	2	PREDICTED: similar to imaginal disc growth factor [Nasonia vitripennis]	48.3 kDa
gi|156547355	XP_001602953	-35.11	-126.88	8.94	7	2	PREDICTED: similar to juvenile hormone epoxide hydrolase [Nasonia vitripennis]	53.7 kDa
gi|156547421	XP_001604560	-8.35	-23.45	2.84	2	2	PREDICTED: similar to laminin gamma 1 chain [Nasonia vitripennis]	179.2 kDa
gi|156545611	XP_001604870	-26.49	-108.65	13.79	4	2	PREDICTED: similar to lectin 4 C-type lectin [Nasonia vitripennis]	26.5 kDa
gi|156538833	XP_001607988	-15.67	-57.12	17.47	6	2	PREDICTED: similar to lectin-related protein [Nasonia vitripennis]	18.4 kDa
gi|156538825	XP_001607975	-51.94	-187.98	8.91	9	2	PREDICTED: similar to Leukotriene A4 hydrolase [Nasonia vitripennis]	70.4 kDa
gi|156552022	XP_001603702	-33.15	-100	4.4	8	2	PREDICTED: similar to lysosomal alpha-mannosidase (mannosidase alpha class 2b member 1) [Nasonia vitripennis]	114.4 kDa
gi|156548092	XP_001606344	-62.96	-236.88	7.54	10	2	PREDICTED: similar to MGC115145 protein [Nasonia vitripennis]	56.6 kDa
gi|156554110	XP_001599068	-7.52	-24.66	7.58	2	2	PREDICTED: similar to microsomal dipeptidase [Nasonia vitripennis]	47.2 kDa
gi|156538140	XP_001608258	-42.77	-171.17	9.01	5	2	PREDICTED: similar to mitochondrial processing peptidase beta subunit [Nasonia vitripennis]	53.4 kDa
gi|156539393	XP_001599956	-4.67	-10.26	4.45	2	2	PREDICTED: similar to moesin [Nasonia vitripennis]	45.5 kDa
gi|156549724	XP_001605685	-44.95	-144.72	1.36	7	2	PREDICTED: similar to p270 [Nasonia vitripennis]	339.8 kDa
gi|156536885	XP_001606843	-8.64	-29.4	11.57	2	2	PREDICTED: similar to phosphoglycerate kinase [Nasonia vitripennis]	44.5 kDa
gi|156552611	XP_001599434	-28.85	31.84	2.41	23	2	PREDICTED: similar to polyubiquitin [Nasonia vitripennis]	102.4 kDa
gi|156544011	XP_001607865	-34.07	-137.6	22.26	5	2	PREDICTED: similar to porin [Nasonia vitripennis]	30.2 kDa
gi|156542504	XP_001600141	-73.13	-323.93	32.85	10	2	PREDICTED: similar to pupal cuticle protein 78E, putative, partial [Nasonia vitripennis]	14.5 kDa
gi|156537211	XP_001604902	-24.92	-89.36	9.91	6	2	PREDICTED: similar to purine nucleoside phosphorylase [Nasonia vitripennis]	36.2 kDa
gi|156548613	XP_001608082	-12.06	-36.81	8.83	5	2	PREDICTED: similar to putative 40S ribosomal protein SA [Nasonia vitripennis]	34.4 kDa
gi|156536899	XP_001607323	-25.46	-98.86	12.37	5	2	PREDICTED: similar to putative beta-NAC-like protein [Nasonia vitripennis]	20.1 kDa
gi|156549246	XP_001607134	-16.25	-63.51	21.86	3	2	PREDICTED: similar to putative GTP-binding nuclear protein Ran [Nasonia vitripennis]	24.6 kDa
gi|156539925	XP_001600310	-2.51	-4.67	17.19	2	2	PREDICTED: similar to putative ribosomal protein Ubq/L40e isoform 1 [Nasonia vitripennis]	14.7 kDa
gi|156539923	XP_001600340	-2.51	-4.67	17.19	2	2	PREDICTED: similar to putative ribosomal protein Ubq/L40e isoform 2 [Nasonia vitripennis]	14.7 kDa
gi|156543734	XP_001607874	-13.78	-47.14	14.74	4	2	PREDICTED: similar to ribosomal protein L14 [Nasonia vitripennis]	18.1 kDa
gi|156536951	XP_001608245	-10.32	-39.45	19.5	2	2	PREDICTED: similar to ribosomal protein L21 [Nasonia vitripennis]	18.2 kDa
gi|156545547	XP_001605069	-12.45	-47.57	20.71	3	2	PREDICTED: similar to ribosomal protein L23 [Nasonia vitripennis]	14.8 kDa
gi|156547850	XP_001604487	-61.26	-239.62	13.36	9	2	PREDICTED: similar to ribosomal protein L23Ae [Nasonia vitripennis]	26.7 kDa
gi|156546944	XP_001605124	-46.35	-188.04	24.29	9	2	PREDICTED: similar to ribosomal protein S12 [Nasonia vitripennis]	15.3 kDa
gi|156546898	XP_001599736	-184.55	-786.74	27.89	22	2	PREDICTED: similar to ribosomal protein S15 [Nasonia vitripennis]	16.9 kDa
gi|156542773	XP_001602816	-10.76	-33.52	16.88	4	2	PREDICTED: similar to ribosomal protein S19e [Nasonia vitripennis]	17.4 kDa
gi|156550181	XP_001604681	-10.54	-39.09	11.15	2	2	PREDICTED: similar to ribosomal protein S2 [Nasonia vitripennis]	30.0 kDa
gi|156551219	XP_001602185	-2.51	-4.26	14.1	2	2	PREDICTED: similar to ribosomal protein S27a [Nasonia vitripennis]	17.9 kDa
gi|156542863	XP_001599933	-15.55	-57.26	8.02	3	2	PREDICTED: similar to ribosomal protein S4e [Nasonia vitripennis]	29.6 kDa
gi|156552609	XP_001599093	-46.84	-199.63	24.43	5	2	PREDICTED: similar to S17e ribosomal protein [Nasonia vitripennis]	15.3 kDa
gi|156542046	XP_001601390	-11.92	-34.61	10.3	5	2	PREDICTED: similar to S18e ribosomal protein [Nasonia vitripennis]	19.0 kDa
gi|156553897	XP_001601352	-10.91	-32.71	2.19	2	2	PREDICTED: similar to spectrin [Nasonia vitripennis]	278.5 kDa
gi|156546835	XP_001606332	-13.47	-52.05	9.38	2	2	PREDICTED: similar to sulfotransferase (sult) [Nasonia vitripennis]	39.8 kDa
gi|156551051	XP_001605644	-29.04	-113.05	15.12	6	2	PREDICTED: similar to translationally controlled tumor protein [Nasonia vitripennis]	19.9 kDa
gi|156541090	XP_001600234	-32.74	-118.67	5.37	7	2	PREDICTED: similar to Tubulin, beta 2c isoform 1 [Nasonia vitripennis]	50.5 kDa
gi|156541092	XP_001600261	-32.74	-116.57	4.76	7	2	PREDICTED: similar to Tubulin, beta 2c isoform 2 [Nasonia vitripennis]	57.1 kDa
gi|156540692	XP_001601021	-9.49	-29.96	2.73	2	2	PREDICTED: similar to ubiquitin-activating enzyme E1 [Nasonia vitripennis]	143.1 kDa
gi|156552730	XP_001599502	-15.09	-44.21	7.04	4	2	PREDICTED: similar to zinc metalloprotease [Nasonia vitripennis]	84.5 kDa
gi|156541066	XP_001599406	-2.43	3.27	2.53	2	1	PREDICTED: hypothetical protein [Nasonia vitripennis]	139.6 kDa
gi|156540039	XP_001600116	-2.43	3.07	2.69	2	1	PREDICTED: hypothetical protein [Nasonia vitripennis]	131.3 kDa
gi|156541449	XP_001602232	-1.84	-1.22	2.06	1	1	PREDICTED: hypothetical protein [Nasonia vitripennis]	128.7 kDa
gi|156542606	XP_001604235	-2.32	-2.03	7.77	2	1	PREDICTED: hypothetical protein [Nasonia vitripennis]	44.8 kDa
gi|156547988	XP_001605306	-1.32	-3.18	7.92	1	1	PREDICTED: hypothetical protein [Nasonia vitripennis]	11.3 kDa
gi|156541696	XP_001603554	-2.85	-7.08	2.26	1	1	PREDICTED: hypothetical protein [Nasonia vitripennis]	94.7 kDa
gi|156552153	XP_001605732	-4.32	-12.75	0.75	1	1	PREDICTED: hypothetical protein [Nasonia vitripennis]	145.0 kDa
gi|156549278	XP_001599978	-4.05	-13.97	3.47	1	1	PREDICTED: hypothetical protein [Nasonia vitripennis]	49.4 kDa
gi|156554226	XP_001602522	-7.4	-29.74	4.95	1	1	PREDICTED: hypothetical protein [Nasonia vitripennis]	35.4 kDa
gi|156551710	XP_001600532	-7.43	-31.64	13.79	1	1	PREDICTED: hypothetical protein [Nasonia vitripennis]	12.7 kDa
gi|156542120	XP_001601691	-10.93	-36.47	4.52	3	1	PREDICTED: hypothetical protein [Nasonia vitripennis]	26.2 kDa
gi|156542118	XP_001601658	-10.93	-37.43	5.71	3	1	PREDICTED: hypothetical protein [Nasonia vitripennis]	20.9 kDa
gi|156548544	XP_001604360	-11.28	-46.67	6.19	1	1	PREDICTED: hypothetical protein [Nasonia vitripennis]	49.0 kDa
gi|156547510	XP_001603936	-1.29	-0.67	3.56	1	1	PREDICTED: similar to 26S proteasome regulatory complex ATPase RPT4 [Nasonia vitripennis]	44.6 kDa
gi|156550346	XP_001606975	-1.48	-2.82	4.18	1	1	PREDICTED: similar to 26S proteasome regulatory complex subunit RPN11 [Nasonia vitripennis]	34.7 kDa
gi|156542034	XP_001601016	-7.48	-27.62	7.18	2	1	PREDICTED: similar to 2-Cys thioredoxin peroxidase [Nasonia vitripennis]	21.7 kDa
gi|156541150	XP_001601398	-22.75	-93.78	8.85	5	1	PREDICTED: similar to 60S acidic ribosomal protein P2 [Nasonia vitripennis]	11.7 kDa
gi|156537745	XP_001607990	-10.64	-42.32	3.27	1	1	PREDICTED: similar to aconitase, mitochondrial [Nasonia vitripennis]	100.0 kDa
gi|156544271	XP_001606978	-4.33	-4.8	4.91	3	1	PREDICTED: similar to actin [Nasonia vitripennis]	49.1 kDa
gi|156541938	XP_001601226	-14.99	-56.04	3.03	2	1	PREDICTED: similar to acyl-coa dehydrogenase [Nasonia vitripennis]	102.1 kDa
gi|156542273	XP_001601217	-3.43	-10.65	2.59	1	1	PREDICTED: similar to aldehyde dehydrogenase [Nasonia vitripennis]	56.2 kDa
gi|156551115	XP_001603449	-5.25	-19.07	2.63	1	1	PREDICTED: similar to aldehyde dehydrogenase [Nasonia vitripennis]	53.2 kDa
gi|156543060	XP_001604662	-1.28	-0.43	2.54	1	1	PREDICTED: similar to alpha-glucosidase [Nasonia vitripennis]	67.7 kDa
gi|156547465	XP_001605336	-20.41	-79.9	4.82	3	1	PREDICTED: similar to alpha-tubulin [Nasonia vitripennis]	47.8 kDa
gi|156544460	XP_001607649	-4.48	-15.19	3.47	1	1	PREDICTED: similar to AMP dependent coa ligase [Nasonia vitripennis]	61.5 kDa
gi|156542271	XP_001600751	-2.74	-3.66	8.98	2	1	PREDICTED: similar to Annexin IX-A [Nasonia vitripennis]	35.8 kDa
gi|156550340	XP_001606535	-6.59	-25.27	4.94	1	1	PREDICTED: similar to ATP-dependent RNA helicase [Nasonia vitripennis]	48.8 kDa
gi|156538078	XP_001607596	-5.47	-16.49	1.09	1	1	PREDICTED: similar to beta chain spectrin [Nasonia vitripennis]	265.8 kDa
gi|156544522	XP_001607195	-4.76	-15.7	2.93	1	1	PREDICTED: similar to beta-adaptin Drosophila 1 [Nasonia vitripennis]	101.9 kDa
gi|156543199	XP_001606262	-17.23	-42.11	1.78	5	1	PREDICTED: similar to Ca/calmodulin-dependent protein kinase phosphatase-N [Nasonia vitripennis]	206.2 kDa
gi|156548256	XP_001607280	-2.48	-7.97	8.28	1	1	PREDICTED: similar to calponin/transgelin [Nasonia vitripennis]	19.1 kDa
gi|156538002	XP_001608200	-1.04	0.5	3.87	1	1	PREDICTED: similar to carboxylesterase [Nasonia vitripennis]	61.7 kDa
gi|156542422	XP_001601414	-648.4	-2954.67	7.71	6	1	PREDICTED: similar to catalase [Nasonia vitripennis]	50.2 kDa
gi|156537850	XP_001608094	-2.53	0.8	2.54	2	1	PREDICTED: similar to CG11482-PA [Nasonia vitripennis]	76.1 kDa
gi|156553409	XP_001599017	-10.66	-39.12	5.54	2	1	PREDICTED: similar to CG12262-PA [Nasonia vitripennis]	45.2 kDa
gi|156543945	XP_001607282	-1.27	-1.02	6.65	1	1	PREDICTED: similar to CG13165-PA [Nasonia vitripennis]	51.0 kDa
gi|156550241	XP_001602182	-17.95	-70.57	4.84	2	1	PREDICTED: similar to CG17838-PE [Nasonia vitripennis]	72.1 kDa
gi|156548262	XP_001600739	-3.29	-8.03	5.83	2	1	PREDICTED: similar to CG3083-PA [Nasonia vitripennis]	24.9 kDa
gi|156537438	XP_001606987	-1.4	2.37	0.64	1	1	PREDICTED: similar to CG34146-PA [Nasonia vitripennis]	217.2 kDa
gi|156548214	XP_001607090	-6.6	-13.77	0.96	2	1	PREDICTED: similar to CG3937-PD [Nasonia vitripennis]	258.3 kDa
gi|156545150	XP_001602794	-17.83	-52.51	3.66	5	1	PREDICTED: similar to CG4170-PA [Nasonia vitripennis]	49.5 kDa
gi|156548992	XP_001607265	-3.98	-12.74	5.11	1	1	PREDICTED: similar to CG5320-PF [Nasonia vitripennis]	60.9 kDa
gi|156547689	XP_001605494	-21.89	-88.87	14.14	5	1	PREDICTED: similar to CG6105-PA [Nasonia vitripennis]	10.9 kDa
gi|156538559	XP_001607423	-3.05	-9.6	9.35	1	1	PREDICTED: similar to CG6439-PA [Nasonia vitripennis]	38.6 kDa
gi|156546902	XP_001599815	-2.73	-6.38	3.03	1	1	PREDICTED: similar to CG7035-PB [Nasonia vitripennis]	92.3 kDa
gi|156543770	XP_001606220	-16.83	-63.69	4.22	3	1	PREDICTED: similar to CG7422-PB [Nasonia vitripennis]	48.4 kDa
gi|156552531	XP_001601507	-1.48	0.37	1.18	1	1	PREDICTED: similar to CG7507-PA [Nasonia vitripennis]	136.8 kDa
gi|156540734	XP_001599525	-5.66	-7.66	4.02	3	1	PREDICTED: similar to CG8542-PA [Nasonia vitripennis]	73.2 kDa
gi|156548948	XP_001607032	-14.57	-62.45	8.38	1	1	PREDICTED: similar to CG9149-PA [Nasonia vitripennis]	41.2 kDa
gi|156540229	XP_001601924	-32.1	-137.11	9.31	2	1	PREDICTED: similar to chaperonin [Nasonia vitripennis]	46.9 kDa
gi|156554920	XP_001606473	-7.07	-27.01	3.95	1	1	PREDICTED: similar to chaperonin subunit 6a zeta isoform 1 [Nasonia vitripennis]	58.0 kDa
gi|156540652	XP_001599228	-1.39	-1.42	3.04	1	1	PREDICTED: similar to chondroitin synthase [Nasonia vitripennis]	51.0 kDa
gi|156537666	XP_001607862	-14.12	-54.59	6.05	3	1	PREDICTED: similar to Chymotrypsin-2 (Chymotrypsin II) [Nasonia vitripennis]	27.3 kDa
gi|156555388	XP_001605367	-6.15	-4.71	1.63	3	1	PREDICTED: similar to conserved hypothetical protein [Nasonia vitripennis]	191.9 kDa
gi|156544189	XP_001606559	-11.62	-44.48	13.2	3	1	PREDICTED: similar to conserved hypothetical protein [Nasonia vitripennis]	22.6 kDa
gi|156545551	XP_001605446	-16.8	-53.03	5.64	6	1	PREDICTED: similar to conserved hypothetical protein [Nasonia vitripennis]	35.6 kDa
gi|156551555	XP_001601024	-39.91	-141.99	3.29	7	1	PREDICTED: similar to conserved hypothetical protein [Nasonia vitripennis]	71.7 kDa
gi|156552848	XP_001600075	-5.8	-16.26	3.61	2	1	PREDICTED: similar to cystathionine beta-synthase [Nasonia vitripennis]	54.9 kDa
gi|156547261	XP_001601960	-52.65	-215.44	5.15	6	1	PREDICTED: similar to cystathionine gamma-lyase [Nasonia vitripennis]	42.7 kDa
gi|156553602	XP_001599777	-5.07	-18.11	4.61	1	1	PREDICTED: similar to cytochrome P450 [Nasonia vitripennis]	56.8 kDa
gi|156552410	XP_001600268	-16.45	-58.54	7.47	4	1	PREDICTED: similar to d-amino acid oxidase [Nasonia vitripennis]	30.9 kDa
gi|156547575	XP_001602897	-3.26	-9.64	3.82	1	1	PREDICTED: similar to DEAD box ATP-dependent RNA helicase [Nasonia vitripennis]	50.8 kDa
gi|156538156	XP_001600447	-1.66	-1.54	3.21	1	1	PREDICTED: similar to DEAH (Asp-Glu-Ala-His) box polypeptide 33 [Nasonia vitripennis]	72.6 kDa
gi|156551692	XP_001601820	-1.13	0.96	3.85	1	1	PREDICTED: similar to dipeptidyl peptidase iii [Nasonia vitripennis]	82.0 kDa
gi|156550793	XP_001607240	-1.48	-1.62	6.3	1	1	PREDICTED: similar to DnaJ homolog subfamily A member 1 isoform 1 [Nasonia vitripennis]	44.7 kDa
gi|156550791	XP_001607255	-1.48	-1.6	6.28	1	1	PREDICTED: similar to DnaJ homolog subfamily A member 1 isoform 2 [Nasonia vitripennis]	44.7 kDa
gi|156537678	XP_001607886	-1.04	2.03	2.06	1	1	PREDICTED: similar to dynamin-associated protein [Nasonia vitripennis]	120.2 kDa
gi|156550105	XP_001605762	-92.85	-418.6	21.43	7	1	PREDICTED: similar to Endocuticle structural glycoprotein SgAbd-1 [Nasonia vitripennis]	13.5 kDa
gi|156550400	XP_001599878	-13.03	-56.49	13.7	1	1	PREDICTED: similar to ENSANGP00000006721 [Nasonia vitripennis]	28.4 kDa
gi|156551021	XP_001600927	-5.81	-20.67	2.55	1	1	PREDICTED: similar to ENSANGP00000011356 [Nasonia vitripennis]	78.8 kDa
gi|156540213	XP_001601921	-1.91	-4.21	6.17	1	1	PREDICTED: similar to ENSANGP00000011972 [Nasonia vitripennis]	35.0 kDa
gi|156553657	XP_001600604	-89.27	-372.16	11.33	9	1	PREDICTED: similar to ENSANGP00000012072 [Nasonia vitripennis]	29.2 kDa
gi|156542899	XP_001601265	-40.12	-173.68	17.35	4	1	PREDICTED: similar to ENSANGP00000012664 [Nasonia vitripennis]	11.0 kDa
gi|156539959	XP_001599129	-2.8	-3.39	6.95	2	1	PREDICTED: similar to ENSANGP00000013457 [Nasonia vitripennis]	58.0 kDa
gi|156548356	XP_001603617	-2.91	-7.91	2.64	1	1	PREDICTED: similar to ENSANGP00000013487 [Nasonia vitripennis]	66.2 kDa
gi|156554194	XP_001600162	-1.4	-0.43	2.19	1	1	PREDICTED: similar to ENSANGP00000013942 [Nasonia vitripennis]	76.9 kDa
gi|156541018	XP_001602925	-2.05	-5.45	7.19	1	1	PREDICTED: similar to ENSANGP00000014264 [Nasonia vitripennis]	34.9 kDa
gi|156549004	XP_001607306	-3.15	-10.09	9.17	1	1	PREDICTED: similar to ENSANGP00000014281 [Nasonia vitripennis]	40.4 kDa
gi|156551722	XP_001603196	-8.77	-29.73	16.03	4	1	PREDICTED: similar to ENSANGP00000017620 [Nasonia vitripennis]	14.6 kDa
gi|156553919	XP_001601890	-4.05	-13.37	2.85	1	1	PREDICTED: similar to ENSANGP00000018469 [Nasonia vitripennis]	58.0 kDa
gi|156538437	XP_001606217	-15.84	-66.15	2.49	1	1	PREDICTED: similar to ENSANGP00000020237 [Nasonia vitripennis]	103.8 kDa
gi|156537311	XP_001606142	-4.28	-14.29	2.8	1	1	PREDICTED: similar to ENSANGP00000020432 [Nasonia vitripennis]	58.0 kDa
gi|156537506	XP_001607401	-3.31	-8.82	3.2	1	1	PREDICTED: similar to ENSANGP00000021292 [Nasonia vitripennis]	97.6 kDa
gi|156540435	XP_001599720	-14.45	-44.93	1.63	3	1	PREDICTED: similar to ENSANGP00000022132 [Nasonia vitripennis]	125.8 kDa
gi|156539732	XP_001601693	-14.45	-57.93	12.33	3	1	PREDICTED: similar to ENSANGP00000022132 [Nasonia vitripennis]	16.5 kDa
gi|156540754	XP_001602485	-14.45	-58.38	15.38	3	1	PREDICTED: similar to ENSANGP00000022132 [Nasonia vitripennis]	13.6 kDa
gi|156545970	XP_001606869	-2.88	-6.3	2.52	1	1	PREDICTED: similar to ENSANGP00000022340 isoform 1 [Nasonia vitripennis]	137.9 kDa
gi|156545972	XP_001606877	-2.88	-6.5	2.78	1	1	PREDICTED: similar to ENSANGP00000022340 isoform 2 [Nasonia vitripennis]	125.5 kDa
gi|156555564	XP_001604694	-1.09	0.14	6.51	1	1	PREDICTED: similar to ENSANGP00000023709 [Nasonia vitripennis]	62.7 kDa
gi|156541490	XP_001600488	-1.85	-3.6	4.94	1	1	PREDICTED: similar to ENSANGP00000024127 [Nasonia vitripennis]	39.5 kDa
gi|156555730	XP_001601926	-1.6	0.84	0.75	1	1	PREDICTED: similar to ENSANGP00000025395 [Nasonia vitripennis]	246.3 kDa
gi|156552754	XP_001599897	-58.46	-230.47	2.65	6	1	PREDICTED: similar to ENSANGP00000026472 [Nasonia vitripennis]	98.6 kDa
gi|156552452	XP_001601171	-1.24	1.6	1.35	1	1	PREDICTED: similar to ENSANGP00000026589 [Nasonia vitripennis]	157.7 kDa
gi|156549782	XP_001606327	-7.58	-30.84	5.94	1	1	PREDICTED: similar to ENSANGP00000029416 [Nasonia vitripennis]	33.0 kDa
gi|156538801	XP_001607941	-1.58	-2.41	5.77	1	1	PREDICTED: similar to ENSANGP00000031364 [Nasonia vitripennis]	29.1 kDa
gi|156538961	XP_001599641	-13.98	-61.43	23.2	1	1	PREDICTED: similar to ENSANGP00000031916 [Nasonia vitripennis]	13.4 kDa
gi|156538967	XP_001599883	-13.98	-61.43	23.2	1	1	PREDICTED: similar to ENSANGP00000031916 [Nasonia vitripennis]	13.4 kDa
gi|156547773	XP_001605919	-3.54	-10.92	4.19	1	1	PREDICTED: similar to esterase [Nasonia vitripennis]	66.9 kDa
gi|156554853	XP_001606624	-23.97	-92.34	3.32	3	1	PREDICTED: similar to estradiol 17 beta-dehydrogenase [Nasonia vitripennis]	79.3 kDa
gi|156549296	XP_001600207	-7.81	-23.75	3.96	2	1	PREDICTED: similar to eukaryotic initiation factor 4B protein [Nasonia vitripennis]	62.5 kDa
gi|156537626	XP_001607783	-2.21	-4.77	2.96	1	1	PREDICTED: similar to eukaryotic translation initiation factor 2 gamma [Nasonia vitripennis]	51.4 kDa
gi|156536887	XP_001606872	-3.44	-11.29	8.77	1	1	PREDICTED: similar to eukaryotic translation initiation factor 3 subunit 4 [Nasonia vitripennis]	31.7 kDa
gi|156552677	XP_001599303	-67.76	-282.59	6.11	8	1	PREDICTED: similar to eukaryotic translation initiation factor 3 subunit 5 epsilon-like protein [Nasonia vitripennis]	32.6 kDa
gi|156537395	XP_001606769	-3.34	-10.18	5.92	1	1	PREDICTED: similar to Fumarate hydratase 1 [Nasonia vitripennis]	50.8 kDa
gi|156546584	XP_001601902	-1.49	-2.52	4.56	1	1	PREDICTED: similar to fumarylacetoacetate hydrolase [Nasonia vitripennis]	46.3 kDa
gi|156544994	XP_001608055	-3.94	-12.79	3.95	1	1	PREDICTED: similar to GA13327-PA [Nasonia vitripennis]	45.8 kDa
gi|156546088	XP_001601249	-2.47	-6.98	6.45	1	1	PREDICTED: similar to GA14484-PA [Nasonia vitripennis]	37.9 kDa
gi|156552637	XP_001603160	-1.82	-2.94	3.18	1	1	PREDICTED: similar to GA16177-PA [Nasonia vitripennis]	71.7 kDa
gi|156551049	XP_001605615	-1.66	-2.36	3.49	1	1	PREDICTED: similar to GA17412-PA [Nasonia vitripennis]	59.5 kDa
gi|156544812	XP_001606616	-3.24	-11.42	6.69	1	1	PREDICTED: similar to GA18288-PA [Nasonia vitripennis]	25.9 kDa
gi|156554542	XP_001605063	-11.51	-43.54	10.3	2	1	PREDICTED: similar to GA21314-PA [Nasonia vitripennis]	32.2 kDa
gi|156553749	XP_001601392	-2.25	-6.38	3.05	1	1	PREDICTED: similar to gamma-glutamyl hydrolase, putative [Nasonia vitripennis]	37.0 kDa
gi|156540453	XP_001599385	-6.49	-22.61	10.82	2	1	PREDICTED: similar to glucosamine-6-phosphate N-acetyltransferase [Nasonia vitripennis]	21.7 kDa
gi|156548632	XP_001608225	-1.26	-2.05	8.91	1	1	PREDICTED: similar to Glutathione S-transferase (GST class-sigma) (Major allergen Bla g 5) [Nasonia vitripennis]	22.6 kDa
gi|156549030	XP_001607373	-33.83	-130.07	3.34	5	1	PREDICTED: similar to glycerol-3-phosphate dehydrogenase [Nasonia vitripennis]	46.2 kDa
gi|156551167	XP_001604410	-16.6	-50.31	2.4	4	1	PREDICTED: similar to glycosyltransferase [Nasonia vitripennis]	109.4 kDa
gi|156545814	XP_001607760	-40.4	-154.89	3.78	6	1	PREDICTED: similar to GTP binding protein [Nasonia vitripennis]	44.7 kDa
gi|156542353	XP_001600299	-9.4	-34.08	7.77	2	1	PREDICTED: similar to H+ transporting ATP synthase gamma subunit [Nasonia vitripennis]	32.6 kDa
gi|156547887	XP_001607898	-1.52	-3.38	6.94	1	1	PREDICTED: similar to H+ transporting ATP synthase subunit d [Nasonia vitripennis]	19.8 kDa
gi|156553644	XP_001600436	-15.61	-40.24	1.99	5	1	PREDICTED: similar to heat shock protein [Nasonia vitripennis]	80.2 kDa
gi|156542837	XP_001599773	-13.81	-50.88	2.13	2	1	PREDICTED: similar to heat shock protein 70 [Nasonia vitripennis]	82.8 kDa
gi|156543973	XP_001604951	-13.81	-51.59	2.5	2	1	PREDICTED: similar to heat shock protein Hsp70 [Nasonia vitripennis]	70.9 kDa
gi|156546764	XP_001605464	-1.29	-1.47	4.72	1	1	PREDICTED: similar to Heterogeneous nuclear ribonucleoprotein K [Nasonia vitripennis]	42.9 kDa
gi|156537036	XP_001601257	-12.76	-34.19	2.25	5	1	PREDICTED: similar to high-affinity Na+-dependent glutamate transporter [Nasonia vitripennis]	58.4 kDa
gi|156553474	XP_001600043	-18.91	-65.98	5	4	1	PREDICTED: similar to histone H2B [Nasonia vitripennis]	31.7 kDa
gi|156549202	XP_001608234	-18.91	-74.38	12.1	4	1	PREDICTED: similar to histone H2B [Nasonia vitripennis]	13.7 kDa
gi|156538971	XP_001599909	-18.91	-74.38	12.1	4	1	PREDICTED: similar to histone H2B [Nasonia vitripennis]	13.7 kDa
gi|156545386	XP_001607945	-18.91	-74.38	12.1	4	1	PREDICTED: similar to histone H2B [Nasonia vitripennis]	13.7 kDa
gi|156548974	XP_001607725	-18.91	-74.38	12.1	4	1	PREDICTED: similar to histone H2B [Nasonia vitripennis]	13.7 kDa
gi|156537898	XP_001608287	-18.91	-74.38	12.1	4	1	PREDICTED: similar to histone H2B [Nasonia vitripennis]	13.7 kDa
gi|156545307	XP_001607523	-18.91	-74.38	12.1	4	1	PREDICTED: similar to histone H2B [Nasonia vitripennis]	13.7 kDa
gi|156548874	XP_001607191	-18.91	-74.38	12.1	4	1	PREDICTED: similar to histone H2B [Nasonia vitripennis]	13.7 kDa
gi|156545108	XP_001603608	-18.91	-74.38	12.1	4	1	PREDICTED: similar to histone H2B [Nasonia vitripennis]	13.7 kDa
gi|156545382	XP_001607906	-18.91	-74.38	12.1	4	1	PREDICTED: similar to histone H2B [Nasonia vitripennis]	13.7 kDa
gi|156545384	XP_001607918	-18.91	-74.38	12.1	4	1	PREDICTED: similar to histone H2B [Nasonia vitripennis]	13.7 kDa
gi|156537632	XP_001608226	-18.91	-74.38	12.1	4	1	PREDICTED: similar to histone H2B [Nasonia vitripennis]	13.7 kDa
gi|156548904	XP_001606665	-18.91	-76.41	14.56	4	1	PREDICTED: similar to histone H2B [Nasonia vitripennis]	11.7 kDa
gi|156538969	XP_001602196	-18.91	-68.13	6.47	4	1	PREDICTED: similar to histone H2B, partial [Nasonia vitripennis]	24.9 kDa
gi|156554010	XP_001605879	-3.02	-8.65	2.35	1	1	PREDICTED: similar to homologue of Sarcophaga 26,29kDa proteinase [Nasonia vitripennis]	62.7 kDa
gi|156550779	XP_001606375	-1.47	-1.61	4.25	1	1	PREDICTED: similar to hydroxyacyl dehydrogenase subunit B/thiolase [Nasonia vitripennis]	51.3 kDa
gi|156542807	XP_001607590	-5.47	-18.86	2.46	1	1	PREDICTED: similar to importin beta-3 [Nasonia vitripennis]	122.8 kDa
gi|156550600	XP_001604166	-1.68	-3.21	2.92	1	1	PREDICTED: similar to inorganic pyrophosphatase [Nasonia vitripennis]	38.7 kDa
gi|156549853	XP_001606880	-1.9	-3.83	3.22	1	1	PREDICTED: similar to IP11896p [Nasonia vitripennis]	51.4 kDa
gi|156543784	XP_001606322	-2.14	-3.34	2.98	1	1	PREDICTED: similar to IP15264p [Nasonia vitripennis]	113.9 kDa
gi|156548282	XP_001605843	-3.62	-6.4	6.18	2	1	PREDICTED: similar to LD23157p [Nasonia vitripennis]	49.4 kDa
gi|156548015	XP_001605591	-2.34	-6.15	4.24	1	1	PREDICTED: similar to LD47223p, partial [Nasonia vitripennis]	38.8 kDa
gi|156554505	XP_001605026	-1.05	0.64	5.11	1	1	PREDICTED: similar to malic enzyme [Nasonia vitripennis]	67.6 kDa
gi|156537832	XP_001608277	-6.43	-24.2	3.14	1	1	PREDICTED: similar to malic enzyme [Nasonia vitripennis]	63.5 kDa
gi|156555925	XP_001603606	-1.94	-3.74	6.63	1	1	PREDICTED: similar to mCG15963 [Nasonia vitripennis]	45.1 kDa
gi|156546550	XP_001607558	-2.14	-6.25	6.35	1	1	PREDICTED: similar to MGC79752 protein [Nasonia vitripennis]	26.9 kDa
gi|156542550	XP_001599308	-1.21	0.65	3.46	1	1	PREDICTED: similar to MGC89333 protein [Nasonia vitripennis]	93.3 kDa
gi|156541238	XP_001600919	-17.2	-54.09	9.77	6	1	PREDICTED: similar to microtubule-associated protein RP/EB family member 3 isoform 1 [Nasonia vitripennis]	29.9 kDa
gi|156541236	XP_001600969	-17.2	-53.37	9.15	6	1	PREDICTED: similar to microtubule-associated protein RP/EB family member 3 isoform 2 [Nasonia vitripennis]	31.7 kDa
gi|156543604	XP_001604275	-1.55	-2.07	7.47	1	1	PREDICTED: similar to mitochondrial ribosomal protein, L37, putative [Nasonia vitripennis]	48.0 kDa
gi|156544942	XP_001607380	-2.1	-6.06	6.82	1	1	PREDICTED: similar to Mn superoxide dismutase [Nasonia vitripennis]	24.5 kDa
gi|156548254	XP_001607274	-2.64	-8.46	8.37	1	1	PREDICTED: similar to muscular protein 20 [Nasonia vitripennis]	22.7 kDa
gi|156552278	XP_001600652	-5.86	-9.09	1.62	3	1	PREDICTED: similar to Na/Ca exchange protein isoform 1 [Nasonia vitripennis]	95.7 kDa
gi|156552276	XP_001600904	-5.86	-9.09	1.62	3	1	PREDICTED: similar to Na/Ca exchange protein isoform 2 [Nasonia vitripennis]	95.6 kDa
gi|156555481	XP_001606289	-2.09	-4.16	3.15	1	1	PREDICTED: similar to neutral endopeptidase 24.11 [Nasonia vitripennis]	69.7 kDa
gi|156555652	XP_001603746	-1.5	-1.4	4.81	1	1	PREDICTED: similar to nucleolar KKE/D repeat protein; DmNOP56 [Nasonia vitripennis]	57.9 kDa
gi|156548044	XP_001605920	-3.13	-10.3	17.05	2	1	PREDICTED: similar to obstractor C1 [Nasonia vitripennis]	13.5 kDa
gi|156552868	XP_001600528	-2.5	-7.96	8.06	1	1	PREDICTED: similar to oxidoreductase [Nasonia vitripennis]	26.8 kDa
gi|156555805	XP_001602443	-1.89	-5.17	12.12	1	1	PREDICTED: similar to peptidoglycan recognition protein-LC [Nasonia vitripennis]	22.1 kDa
gi|156552627	XP_001600555	-12.21	-51.34	4.79	1	1	PREDICTED: similar to phenylalanine hydroxylase [Nasonia vitripennis]	52.2 kDa
gi|156547065	XP_001601749	-4.32	-16.23	8.54	1	1	PREDICTED: similar to phosphatidylethanolamine-binding protein [Nasonia vitripennis]	22.7 kDa
gi|156554183	XP_001599986	-1.45	-1.37	3.05	1	1	PREDICTED: similar to phosphoglucose isomerase [Nasonia vitripennis]	62.2 kDa
gi|156546146	XP_001602648	-4.77	-17.42	5.13	1	1	PREDICTED: similar to phosphoglycerate mutase [Nasonia vitripennis]	35.5 kDa
gi|156543362	XP_001608132	-25.32	-97.44	12.08	5	1	PREDICTED: similar to phospholipid-hydroperoxide glutathione peroxidase [Nasonia vitripennis]	23.4 kDa
gi|156554540	XP_001605473	-3.82	-13.57	9.54	1	1	PREDICTED: similar to phosphomannomutase [Nasonia vitripennis]	30.2 kDa
gi|156551650	XP_001600620	-30.84	-118.72	8.2	5	1	PREDICTED: similar to Phosphoserine aminotransferase 1 [Nasonia vitripennis]	40.5 kDa
gi|156542799	XP_001607402	-10.63	-43.94	19.84	2	1	PREDICTED: similar to profilin [Nasonia vitripennis]	13.7 kDa
gi|156544088	XP_001603578	-10.62	-37.25	3.11	2	1	PREDICTED: similar to Prolyl endopeptidase [Nasonia vitripennis]	79.7 kDa
gi|156553114	XP_001600151	-10.49	-39.05	3.94	2	1	PREDICTED: similar to prophenoloxidase activating factor [Nasonia vitripennis]	46.9 kDa
gi|156538018	XP_001608208	-1.86	0.13	0.45	1	1	PREDICTED: similar to protease m1 zinc metalloprotease [Nasonia vitripennis]	304.2 kDa
gi|156539935	XP_001599218	-1.06	-1.9	6.34	1	1	PREDICTED: similar to proteasome beta 3 subunit [Nasonia vitripennis]	22.9 kDa
gi|156554116	XP_001602967	-7.54	-29.68	6.64	1	1	PREDICTED: similar to protein disulfide isomerase [Nasonia vitripennis]	47.9 kDa
gi|156544490	XP_001602738	-1.33	-1.7	5.79	1	1	PREDICTED: similar to protein phosphatase 1, catalytic subunit, alpha isoform 1 [Nasonia vitripennis]	37.5 kDa
gi|156544494	XP_001603113	-1.33	-2.08	6.38	1	1	PREDICTED: similar to protein phosphatase 1, catalytic subunit, alpha isoform 3 [Nasonia vitripennis]	33.9 kDa
gi|156551045	XP_001604757	-2.1	-6.57	9.38	1	1	PREDICTED: similar to protein serine/threonine kinase, putative isoform 1 [Nasonia vitripennis]	14.5 kDa
gi|156551043	XP_001604805	-2.1	-6.57	9.38	1	1	PREDICTED: similar to protein serine/threonine kinase, putative isoform 2 [Nasonia vitripennis]	14.5 kDa
gi|156542502	XP_001600091	-111.27	-490.59	17.76	11	1	PREDICTED: similar to pupal cuticle protein 78E, putative [Nasonia vitripennis]	16.5 kDa
gi|156547118	XP_001602867	-1.2	-4.22	13.98	1	1	PREDICTED: similar to pupal cuticle protein 78E, putative, partial [Nasonia vitripennis]	10.3 kDa
gi|156538218	XP_001601888	-20.73	-82.02	7.72	3	1	PREDICTED: similar to pur-alpha [Nasonia vitripennis]	35.5 kDa
gi|156545016	XP_001600046	-3.47	-11.41	4.51	1	1	PREDICTED: similar to putative 14-3-3 protein [Nasonia vitripennis]	27.8 kDa
gi|156549937	XP_001602658	-1.44	-2.81	10.15	1	1	PREDICTED: similar to putative alcohol dehydrogenase [Nasonia vitripennis]	29.6 kDa
gi|156546768	XP_001607232	-3.69	-12.53	6.53	1	1	PREDICTED: similar to putative alcohol dehydrogenase [Nasonia vitripennis]	36.4 kDa
gi|156549973	XP_001603697	-36.09	-153.87	12.19	3	1	PREDICTED: similar to putative alcohol dehydrogenase [Nasonia vitripennis]	31.2 kDa
gi|156546622	XP_001602766	-8.05	-29.82	7.22	2	1	PREDICTED: similar to putative chymotrypsin-like protein [Nasonia vitripennis]	31.0 kDa
gi|156541870	XP_001600308	-8.96	-36.4	3.16	1	1	PREDICTED: similar to putative eukaryotic translation initiation factor 3 subunit 6 [Nasonia vitripennis]	46.7 kDa
gi|156546791	XP_001607354	-5.28	-17.34	9.05	2	1	PREDICTED: similar to putative ferritin 2 [Nasonia vitripennis]	25.0 kDa
gi|156551940	XP_001607748	-44.98	-174.57	13.59	9	1	PREDICTED: similar to putative muscular protein 20 [Nasonia vitripennis]	20.4 kDa
gi|156540081	XP_001600011	-5.44	-15.75	8.44	3	1	PREDICTED: similar to putative prohibitin [Nasonia vitripennis]	17.0 kDa
gi|156544948	XP_001607509	-18.91	-69.34	5.42	4	1	PREDICTED: similar to putative Rho1 [Nasonia vitripennis]	31.2 kDa
gi|156547333	XP_001601399	-3.5	-12.1	8.44	1	1	PREDICTED: similar to putative ribosomal protein L24e [Nasonia vitripennis]	17.6 kDa
gi|156555821	XP_001599834	-1.13	-2.4	11.2	1	1	PREDICTED: similar to putative salivary secreted peptide [Nasonia vitripennis]	13.8 kDa
gi|156548765	XP_001604584	-1.63	-3.07	8.56	1	1	PREDICTED: similar to pyruvate dehydrogenase [Nasonia vitripennis]	39.3 kDa
gi|156551652	XP_001600651	-24.02	-89.26	3.09	4	1	PREDICTED: similar to pyruvate kinase [Nasonia vitripennis]	59.9 kDa
gi|156545982	XP_001607208	-3.41	-12.06	8.06	1	1	PREDICTED: similar to rab1 [Nasonia vitripennis]	23.5 kDa
gi|156551229	XP_001604366	-22.25	-90.05	6.35	3	1	PREDICTED: similar to RE22593p [Nasonia vitripennis]	34.1 kDa
gi|156539611	XP_001601127	-2.78	-5.98	1.69	1	1	PREDICTED: similar to retrotransposon protein, putative, unclassified [Nasonia vitripennis]	89.1 kDa
gi|156541126	XP_001601669	-6.2	-17.25	2.62	2	1	PREDICTED: similar to ribophorin ii [Nasonia vitripennis]	71.4 kDa
gi|156550771	XP_001605533	-4.16	-10.93	5.99	2	1	PREDICTED: similar to ribosomal protein L10a [Nasonia vitripennis]	24.5 kDa
gi|156544263	XP_001607270	-15.69	-55.53	7.18	4	1	PREDICTED: similar to ribosomal protein L11 [Nasonia vitripennis]	22.2 kDa
gi|156549881	XP_001605642	-1.01	-1.37	5.45	1	1	PREDICTED: similar to ribosomal protein L12 [Nasonia vitripennis]	17.8 kDa
gi|156547540	XP_001607573	-32.86	-130.05	5.95	5	1	PREDICTED: similar to ribosomal protein L17 [Nasonia vitripennis]	21.3 kDa
gi|156544528	XP_001607320	-1.38	-2.07	4.52	1	1	PREDICTED: similar to ribosomal protein L18a [Nasonia vitripennis]	20.8 kDa
gi|156544508	XP_001605284	-1.38	-2.07	4.52	1	1	PREDICTED: similar to ribosomal protein L18a [Nasonia vitripennis]	20.8 kDa
gi|156554769	XP_001602817	-32.09	-129.03	8.5	4	1	PREDICTED: similar to ribosomal protein L19 [Nasonia vitripennis]	23.6 kDa
gi|156553855	XP_001600269	-2.3	-6.93	8.51	1	1	PREDICTED: similar to ribosomal protein L22e [Nasonia vitripennis]	16.7 kDa
gi|156552242	XP_001607671	-8.72	-24.46	5.37	4	1	PREDICTED: similar to ribosomal protein L27a [Nasonia vitripennis]	16.9 kDa
gi|156555608	XP_001599538	-3.74	-11.57	10.53	2	1	PREDICTED: similar to ribosomal protein L30 [Nasonia vitripennis]	12.5 kDa
gi|156548298	XP_001606808	-2.72	-8.9	7.76	1	1	PREDICTED: similar to ribosomal protein L36 [Nasonia vitripennis]	13.5 kDa
gi|156550715	XP_001607539	-12.47	-47.25	5.47	2	1	PREDICTED: similar to ribosomal protein L7e [Nasonia vitripennis]	30.1 kDa
gi|156547530	XP_001607020	-4.95	-13.14	4.28	2	1	PREDICTED: similar to ribosomal protein L8 isoform 1 [Nasonia vitripennis]	28.1 kDa
gi|156547532	XP_001607030	-4.95	-13.14	4.28	2	1	PREDICTED: similar to ribosomal protein L8 isoform 2 [Nasonia vitripennis]	28.1 kDa
gi|156553504	XP_001600790	-19.14	-69.58	12.14	5	1	PREDICTED: similar to ribosomal protein S13e [Nasonia vitripennis]	15.8 kDa
gi|156555273	XP_001603203	-12.51	-41.84	5.7	3	1	PREDICTED: similar to Ruvbl1 protein [Nasonia vitripennis]	50.4 kDa
gi|156554296	XP_001602465	-11.77	-44.18	9.93	3	1	PREDICTED: similar to S14e ribosomal protein [Nasonia vitripennis]	16.2 kDa
gi|156551257	XP_001599263	-1.34	-2.74	7.56	1	1	PREDICTED: similar to S25e ribosomal protein [Nasonia vitripennis]	13.4 kDa
gi|156553020	XP_001604672	-2.05	-5.19	4.74	1	1	PREDICTED: similar to serine-type enodpeptidase, putative [Nasonia vitripennis]	30.4 kDa
gi|156551599	XP_001602488	-3.21	-11.17	8.09	1	1	PREDICTED: similar to serine-type enodpeptidase, putative [Nasonia vitripennis]	29.4 kDa
gi|156548064	XP_001606152	-43.25	-169.43	2.35	6	1	PREDICTED: similar to serpin [Nasonia vitripennis]	47.9 kDa
gi|156554371	XP_001604098	-3.39	-5.51	2.84	2	1	PREDICTED: similar to SHQ1 homolog (S. cerevisiae) [Nasonia vitripennis]	60.1 kDa
gi|156550476	XP_001602398	-4.55	-17.81	5.73	1	1	PREDICTED: similar to signal sequence receptor beta subunit [Nasonia vitripennis]	21.6 kDa
gi|156548005	XP_001605495	-1.06	1.08	2.4	1	1	PREDICTED: similar to signal transducer and activator of transcription [Nasonia vitripennis]	89.8 kDa
gi|156537145	XP_001603591	-40.42	-164.28	3.09	4	1	PREDICTED: similar to Sorting and assembly machinery component 50 homolog (S. cerevisiae) [Nasonia vitripennis]	61.0 kDa
gi|156554240	XP_001601239	-2.5	-0.7	3.53	2	1	PREDICTED: similar to stathmin [Nasonia vitripennis]	35.1 kDa
gi|156544816	XP_001606637	-1.62	-2.45	4.57	1	1	PREDICTED: similar to target of myb1 (tom1) [Nasonia vitripennis]	53.3 kDa
gi|156554805	XP_001606158	-2.38	-6.06	1.96	1	1	PREDICTED: similar to teratocyte released chitinase [Nasonia vitripennis]	57.0 kDa
gi|156552169	XP_001605876	-5.05	-12.1	2.8	2	1	PREDICTED: similar to transcriptional adaptor 3 [Nasonia vitripennis]	52.2 kDa
gi|156554441	XP_001600505	-2.91	-7.17	3.89	1	1	PREDICTED: similar to transferrin [Nasonia vitripennis]	76.8 kDa
gi|156544887	XP_001607864	-14.83	-51.06	9.57	5	1	PREDICTED: similar to transgelin [Nasonia vitripennis]	20.7 kDa
gi|156546016	XP_001607974	-4.13	-15.96	7.5	1	1	PREDICTED: similar to translation initiation factor 5a isoform 1 [Nasonia vitripennis]	17.7 kDa
gi|156546014	XP_001607976	-4.13	-15.96	7.5	1	1	PREDICTED: similar to translation initiation factor 5a isoform 2 [Nasonia vitripennis]	17.7 kDa
gi|156546018	XP_001607980	-4.13	-15.96	7.5	1	1	PREDICTED: similar to translation initiation factor 5a isoform 3 [Nasonia vitripennis]	17.7 kDa
gi|156553823	XP_001606297	-11.63	-51.69	21.1	2	1	PREDICTED: similar to transmembrane protein 14C [Nasonia vitripennis]	11.3 kDa
gi|156554552	XP_001605564	-5.13	-14.88	10.07	2	1	PREDICTED: similar to transmembrane protein, putative [Nasonia vitripennis]	33.9 kDa
gi|156547621	XP_001603693	-3.65	-10.6	3.51	1	1	PREDICTED: similar to trehalose 6-phosphate synthase [Nasonia vitripennis]	89.8 kDa
gi|156541964	XP_001600119	-4.5	-8.57	8.1	3	1	PREDICTED: similar to triosephoshpate isomerase [Nasonia vitripennis]	26.8 kDa
gi|156550398	XP_001599824	-27.84	-118.56	14.23	3	1	PREDICTED: similar to trypsin [Nasonia vitripennis]	28.1 kDa
gi|156553310	XP_001599735	-4.56	-10.46	4.73	2	1	PREDICTED: similar to tryptophan oxygenase [Nasonia vitripennis]	48.5 kDa
gi|156538004	XP_001608201	-20.53	-79.74	4.99	3	1	PREDICTED: similar to ubiquinol-cytochrome c reductase core protein II [Nasonia vitripennis]	47.0 kDa
gi|156538631	XP_001607652	-4.61	-6.02	1.59	2	1	PREDICTED: similar to UDP-glucose glycoprotein:glucosyltransferase [Nasonia vitripennis]	180.1 kDa
gi|156543768	XP_001606199	-41.08	-155.99	3.53	6	1	PREDICTED: similar to UDP-glucose pyrophosphorylase [Nasonia vitripennis]	57.6 kDa
gi|156548580	XP_001607505	-19.14	-72.9	13.57	4	1	PREDICTED: similar to vacuolar sorting protein [Nasonia vitripennis]	24.4 kDa
gi|156547558	XP_001602538	-4.16	-14.9	6.43	1	1	PREDICTED: similar to venom carbohydrate-rich protein [Nasonia vitripennis]	38.3 kDa

## Sheet: DP7
gi#	Accession	log.E-Value Sum	Protein Score	%Coverage	#Pep.	#Unique Pep.	Protein Description	MW
gi|156544337	XP_001607303	-1092.81	-3711.1	28.62	154	41	PREDICTED: similar to CG17927-PF [Nasonia vitripennis]	224.5 kDa
gi|156542452	XP_001599110	-27442.8	-117141	64.85	1617	40	PREDICTED: similar to high Glx storage protein [Nasonia vitripennis]	102.6 kDa
gi|156538313	XP_001604024	-1131.76	-4202.82	14.8	108	38	PREDICTED: similar to apolipophorin [Nasonia vitripennis]	374.8 kDa
gi|156545565	XP_001607012	-6098.26	-20667.7	54.15	1216	37	PREDICTED: similar to hexamerin 2 [Nasonia vitripennis]	83.7 kDa
gi|156542989	XP_001603025	-1.#J	-1.#J	53.83	1182	33	PREDICTED: similar to high Glx storage protein [Nasonia vitripennis]	108.2 kDa
gi|156537243	XP_001605359	-647.32	-2479.08	43.55	92	21	PREDICTED: similar to protein disulfide isomerase [Nasonia vitripennis]	55.7 kDa
gi|156545718	XP_001604915	-601.25	-1957.05	25.83	130	18	PREDICTED: similar to hexamerin [Nasonia vitripennis]	94.8 kDa
gi|156545567	XP_001607029	-1236.17	-4884.56	38.51	137	17	PREDICTED: similar to hexamerin [Nasonia vitripennis]	81.6 kDa
gi|156548062	XP_001606111	-1752.45	-7551.46	34.9	94	14	PREDICTED: similar to serpin 6 [Nasonia vitripennis]	58.9 kDa
gi|156544486	XP_001602474	-451.61	-1861.55	78.42	64	12	PREDICTED: similar to apolipophorin-III [Nasonia vitripennis]	20.8 kDa
gi|156541054	XP_001601342	-1352.07	-5791.83	51.06	97	12	PREDICTED: similar to RE12057p isoform 1 [Nasonia vitripennis]	41.8 kDa
gi|156542175	XP_001600960	-1338.61	-5743.27	51.06	94	12	PREDICTED: similar to RE12057p isoform 1 [Nasonia vitripennis]	41.8 kDa
gi|156552724	XP_001599431	-439.64	-1709.34	21.57	50	12	PREDICTED: similar to zinc metalloprotease [Nasonia vitripennis]	90.3 kDa
gi|156546948	XP_001605607	-1711.63	-7486.96	36.01	73	11	PREDICTED: similar to elongation factor 1-alpha isoform 1 [Nasonia vitripennis]	50.2 kDa
gi|156546950	XP_001605623	-1711.63	-7496	38.88	73	11	PREDICTED: similar to elongation factor 1-alpha isoform 2 [Nasonia vitripennis]	46.7 kDa
gi|156554292	XP_001601054	-248.41	-931.19	32.6	46	11	PREDICTED: similar to putative fructose 1,6-bisphosphate aldolase [Nasonia vitripennis]	39.4 kDa
gi|156551117	XP_001601759	-356.21	-1356.57	36.51	55	10	PREDICTED: similar to aldehyde dehydrogenase [Nasonia vitripennis]	51.2 kDa
gi|156541056	XP_001601369	-1239.54	-5433.19	48.39	65	10	PREDICTED: similar to RE12057p isoform 2 [Nasonia vitripennis]	37.8 kDa
gi|156542177	XP_001600991	-1226.08	-5383.88	48.39	62	10	PREDICTED: similar to RE12057p isoform 2 [Nasonia vitripennis]	37.8 kDa
gi|156538985	XP_001600854	-778.87	-3427.61	36.5	39	9	PREDICTED: similar to beta-1 tubulin, partial [Nasonia vitripennis]	37.3 kDa
gi|156541819	XP_001600338	-86.44	-296.1	26.32	20	9	PREDICTED: similar to beta-hexosaminidase b [Nasonia vitripennis]	56.0 kDa
gi|156541821	XP_001600369	-86.44	-296.73	23.99	20	9	PREDICTED: similar to beta-hexosaminidase b [Nasonia vitripennis]	61.0 kDa
gi|156549563	XP_001607238	-145.65	-506.09	23.81	29	9	PREDICTED: similar to ENSANGP00000024604 isoform 1 [Nasonia vitripennis]	59.1 kDa
gi|156549565	XP_001607253	-145.65	-505.08	23.55	29	9	PREDICTED: similar to ENSANGP00000024604 isoform 2 [Nasonia vitripennis]	59.7 kDa
gi|156549941	XP_001602718	-572.88	-2466.97	48.12	44	9	PREDICTED: similar to putative alcohol dehydrogenase [Nasonia vitripennis]	29.2 kDa
gi|156554900	XP_001600911	-1312.63	-5677.41	35.9	82	9	PREDICTED: similar to RE12057p isoform 1 [Nasonia vitripennis]	41.8 kDa
gi|156554898	XP_001600934	-1312.63	-5677.41	35.9	82	9	PREDICTED: similar to RE12057p isoform 2 [Nasonia vitripennis]	41.8 kDa
gi|156549032	XP_001607937	-158.82	-605.47	28.18	27	9	PREDICTED: similar to sn-glycerol-3-phosphate dehydrogenase [Nasonia vitripennis]	40.5 kDa
gi|156552722	XP_001599405	-429.01	-1682.18	18.4	47	9	PREDICTED: similar to zinc metalloprotease [Nasonia vitripennis]	83.4 kDa
gi|156547846	XP_001604160	-198.84	-749.2	27.56	36	8	PREDICTED: similar to alpha tubulin [Nasonia vitripennis]	50.0 kDa
gi|156548149	XP_001607699	-198.84	-749.92	27.56	36	8	PREDICTED: similar to alpha tubulin [Nasonia vitripennis]	50.0 kDa
gi|156548568	XP_001606870	-173.02	-649.4	27.56	32	8	PREDICTED: similar to alpha tubulin [Nasonia vitripennis]	50.0 kDa
gi|156547891	XP_001608047	-194.56	-811.25	57.58	26	8	PREDICTED: similar to fatty acid binding protein isoform 1 [Nasonia vitripennis]	15.0 kDa
gi|156545368	XP_001606222	-50.82	-134.41	15.36	15	8	PREDICTED: similar to protease m1 zinc metalloprotease [Nasonia vitripennis]	104.3 kDa
gi|156554902	XP_001601057	-1213.4	-5359.34	36.36	54	8	PREDICTED: similar to RE12057p isoform 3 [Nasonia vitripennis]	37.9 kDa
gi|156550530	XP_001602460	-364.99	-1522.45	15.64	24	8	PREDICTED: similar to translation elongation factor 2 [Nasonia vitripennis]	96.5 kDa
gi|156542120	XP_001601691	-85.85	-325.97	19	15	7	PREDICTED: hypothetical protein [Nasonia vitripennis]	26.2 kDa
gi|156546036	XP_001600126	-105.29	-380.95	23.01	19	7	PREDICTED: similar to CG4898-PB [Nasonia vitripennis]	39.3 kDa
gi|156541962	XP_001600045	-89.93	-299.9	21.85	20	7	PREDICTED: similar to ENSANGP00000014839 [Nasonia vitripennis]	60.6 kDa
gi|156551075	XP_001602774	-405.79	-1763.78	14.2	17	7	PREDICTED: similar to ENSANGP00000016878 [Nasonia vitripennis]	92.3 kDa
gi|156544237	XP_001606813	-121.03	-430.35	19.02	26	7	PREDICTED: similar to ENSANGP00000029516 [Nasonia vitripennis]	48.2 kDa
gi|156547893	XP_001608053	-184.81	-775.26	49.24	23	7	PREDICTED: similar to fatty acid binding protein isoform 2 [Nasonia vitripennis]	15.1 kDa
gi|156555785	XP_001603238	-510.71	-2190.76	18.82	32	7	PREDICTED: similar to GH08974p [Nasonia vitripennis]	51.3 kDa
gi|156553655	XP_001600547	-109.59	-397.62	30.79	24	7	PREDICTED: similar to mitochondrial malate dehydrogenase [Nasonia vitripennis]	35.9 kDa
gi|156541477	XP_001600227	-78.33	-261.1	15.15	16	7	PREDICTED: similar to phosphoenolpyruvate carboxykinase [Nasonia vitripennis]	80.9 kDa
gi|156542010	XP_001599268	-100.08	-311.09	11.29	21	7	PREDICTED: similar to standard paramyosin [Nasonia vitripennis]	102.4 kDa
gi|156539999	XP_001598993	-93.75	-371.72	33.33	18	6	PREDICTED: hypothetical protein [Nasonia vitripennis]	21.3 kDa
gi|156542118	XP_001601658	-84.31	-328	18.86	14	6	PREDICTED: hypothetical protein [Nasonia vitripennis]	20.9 kDa
gi|156553669	XP_001602360	-696.54	-3104.6	16.59	23	6	PREDICTED: similar to beta-tubulin [Nasonia vitripennis]	49.9 kDa
gi|156548582	XP_001607513	-144.79	-502.43	17.74	29	6	PREDICTED: similar to bifunctional purine biosynthesis protein [Nasonia vitripennis]	64.3 kDa
gi|156537672	XP_001607871	-76.15	-289.47	33.75	15	6	PREDICTED: similar to Chymotrypsin-2 (Chymotrypsin II) [Nasonia vitripennis]	35.5 kDa
gi|156552398	XP_001600211	-462.03	-2036.76	40.19	29	6	PREDICTED: similar to conserved hypothetical protein [Nasonia vitripennis]	23.2 kDa
gi|156546548	XP_001607360	-188.66	-771.18	38.14	27	6	PREDICTED: similar to ferritin [Nasonia vitripennis]	24.1 kDa
gi|156543557	XP_001603460	-64.66	-217.09	14.95	18	6	PREDICTED: similar to GA17427-PA [Nasonia vitripennis]	51.1 kDa
gi|156547538	XP_001607474	-136.77	-555.16	27.84	17	6	PREDICTED: similar to glyceraldehyde-3-phosphate dehydrogenase [Nasonia vitripennis]	35.6 kDa
gi|156548276	XP_001604985	-513.68	-2253.09	45.73	32	6	PREDICTED: similar to lethal(2)essential for life protein, l2efl [Nasonia vitripennis]	23.0 kDa
gi|156542193	XP_001599856	-634.64	-2221.76	6.15	95	6	PREDICTED: similar to major allergen Bla g 1.02 [Nasonia vitripennis]	159.5 kDa
gi|156555799	XP_001601504	-1114.52	-4966.73	22.61	37	6	PREDICTED: similar to RE12057p isoform 1 [Nasonia vitripennis]	41.8 kDa
gi|156555801	XP_001601591	-1114.52	-4975.94	24.93	37	6	PREDICTED: similar to RE12057p isoform 2 [Nasonia vitripennis]	37.9 kDa
gi|156554805	XP_001606158	-27.52	-87.68	20.59	8	6	PREDICTED: similar to teratocyte released chitinase [Nasonia vitripennis]	57.0 kDa
gi|156545978	XP_001607122	-63.66	-229.68	17.18	13	5	PREDICTED: similar to arginine kinase-like protein [Nasonia vitripennis]	39.9 kDa
gi|156547751	XP_001605713	-110.5	-415.32	14.56	16	5	PREDICTED: similar to CG5397-PA [Nasonia vitripennis]	80.4 kDa
gi|156537668	XP_001607866	-118.87	-465.77	34.13	23	5	PREDICTED: similar to Chymotrypsin-2 (Chymotrypsin II) [Nasonia vitripennis]	27.3 kDa
gi|156551487	XP_001605133	-33.31	-123.7	30.55	8	5	PREDICTED: similar to ENSANGP00000010625 [Nasonia vitripennis]	29.8 kDa
gi|156551491	XP_001605187	-82.75	-279.96	8.71	18	5	PREDICTED: similar to ENSANGP00000011975 [Nasonia vitripennis]	75.1 kDa
gi|156545557	XP_001606463	-131.21	-472	9.56	22	5	PREDICTED: similar to ENSANGP00000012893 [Nasonia vitripennis]	72.7 kDa
gi|156542436	XP_001599772	-71.87	-267.95	19.58	14	5	PREDICTED: similar to ENSANGP00000014344 [Nasonia vitripennis]	42.4 kDa
gi|156543677	XP_001605350	-112.42	-391.11	11.14	20	5	PREDICTED: similar to hydroxyacyl-coenzyme A dehydrogenase [Nasonia vitripennis]	82.1 kDa
gi|156551934	XP_001607542	-90.23	-354.4	21.66	13	4	PREDICTED: hypothetical protein [Nasonia vitripennis]	36.4 kDa
gi|156545944	XP_001603380	-54.41	-197.37	10.46	10	4	PREDICTED: hypothetical protein [Nasonia vitripennis]	56.6 kDa
gi|156552153	XP_001605732	-13.6	-19.72	4.6	6	4	PREDICTED: hypothetical protein [Nasonia vitripennis]	145.0 kDa
gi|156536927	XP_001608110	-25.63	-86.2	27.45	8	4	PREDICTED: similar to 3-hydroxyacyl-CoA dehydrogenase type II isoform 1 [Nasonia vitripennis]	26.9 kDa
gi|156536929	XP_001608111	-25.63	-85.98	26.92	8	4	PREDICTED: similar to 3-hydroxyacyl-CoA dehydrogenase type II isoform 2 [Nasonia vitripennis]	27.4 kDa
gi|156547253	XP_001601340	-38.74	-142.89	18.3	8	4	PREDICTED: similar to 3-hydroxyacyl-coa dehyrogenase [Nasonia vitripennis]	35.7 kDa
gi|156553875	XP_001600932	-390.21	-1742.49	19.42	11	4	PREDICTED: similar to 4-hydroxyphenylpyruvate dioxygenase [Nasonia vitripennis]	47.2 kDa
gi|156543342	XP_001607606	-28.94	-90.26	19.3	10	4	PREDICTED: similar to acidic p0 ribosomal protein [Nasonia vitripennis]	34.0 kDa
gi|156548615	XP_001608103	-22.82	-92	33.33	5	4	PREDICTED: similar to CuZn superoxide dismutase [Nasonia vitripennis]	15.4 kDa
gi|156553110	XP_001599656	-80.18	-301.33	12.55	11	4	PREDICTED: similar to cxpwmw03 [Nasonia vitripennis]	80.2 kDa
gi|156555286	XP_001605157	-53.68	-203.02	15.96	10	4	PREDICTED: similar to cytosolic malate dehydrogenase [Nasonia vitripennis]	35.9 kDa
gi|156542191	XP_001600781	-31.31	-68.75	9.76	14	4	PREDICTED: similar to Elongation factor 1-alpha (EF-1-alpha) [Nasonia vitripennis]	50.6 kDa
gi|156546522	XP_001606212	-42.04	-152.51	21.55	9	4	PREDICTED: similar to ENSANGP00000013285 [Nasonia vitripennis]	41.6 kDa
gi|156552049	XP_001603900	-69.64	-278.11	38.62	20	4	PREDICTED: similar to ENSANGP00000019735 [Nasonia vitripennis]	15.7 kDa
gi|156538074	XP_001607543	-48.7	-174.11	32.49	14	4	PREDICTED: similar to ENSANGP00000022132 [Nasonia vitripennis]	25.5 kDa
gi|156537922	XP_001608147	-123.03	-475.44	17.41	17	4	PREDICTED: similar to GA18703-PA [Nasonia vitripennis]	61.4 kDa
gi|156551429	XP_001604269	-30.41	-98.66	9.72	7	4	PREDICTED: similar to gmp synthase [Nasonia vitripennis]	78.7 kDa
gi|156544504	XP_001605191	-31.46	-106.51	6.01	6	4	PREDICTED: similar to heat shock protein 90 [Nasonia vitripennis]	82.1 kDa
gi|156552551	XP_001599009	-27.98	-94.79	40.78	11	4	PREDICTED: similar to histone H4 [Nasonia vitripennis]	11.4 kDa
gi|156548636	XP_001608236	-27.98	-95.75	40.78	11	4	PREDICTED: similar to histone H4 [Nasonia vitripennis]	11.4 kDa
gi|156544980	XP_001607925	-27.98	-95.75	40.78	11	4	PREDICTED: similar to histone H4 [Nasonia vitripennis]	11.4 kDa
gi|156548574	XP_001607199	-27.98	-95.75	40.78	11	4	PREDICTED: similar to histone H4 [Nasonia vitripennis]	11.4 kDa
gi|156553444	XP_001599591	-27.98	-95.75	40.78	11	4	PREDICTED: similar to histone H4 [Nasonia vitripennis]	11.4 kDa
gi|156536987	XP_001608282	-27.98	-95.75	40.78	11	4	PREDICTED: similar to histone H4 [Nasonia vitripennis]	11.4 kDa
gi|156548578	XP_001607366	-27.98	-95.75	40.78	11	4	PREDICTED: similar to histone H4 [Nasonia vitripennis]	11.4 kDa
gi|156544974	XP_001607894	-23.88	-79.89	40.78	10	4	PREDICTED: similar to histone H4 [Nasonia vitripennis]	11.4 kDa
gi|156540342	XP_001599230	-24.82	-84.24	40.78	10	4	PREDICTED: similar to histone H4 [Nasonia vitripennis]	11.4 kDa
gi|156536993	XP_001608285	-25.97	-89.5	40.78	10	4	PREDICTED: similar to histone H4 [Nasonia vitripennis]	11.4 kDa
gi|156544925	XP_001603581	-20.59	-67.73	40.78	9	4	PREDICTED: similar to histone H4 [Nasonia vitripennis]	11.4 kDa
gi|156553446	XP_001599471	-24.29	-84.79	40.78	9	4	PREDICTED: similar to histone H4 [Nasonia vitripennis]	11.4 kDa
gi|156544964	XP_001607554	-25.16	-88.8	40.78	9	4	PREDICTED: similar to histone H4 [Nasonia vitripennis]	11.4 kDa
gi|156540778	XP_001599305	-26.17	-80.51	15.1	8	4	PREDICTED: similar to imaginal disc growth factor [Nasonia vitripennis]	48.3 kDa
gi|156543824	XP_001608101	-38.96	-137.06	18.09	8	4	PREDICTED: similar to isocitrate dehydrogenase [Nasonia vitripennis]	46.1 kDa
gi|156547355	XP_001602953	-90.11	-345.39	15.11	14	4	PREDICTED: similar to juvenile hormone epoxide hydrolase [Nasonia vitripennis]	53.7 kDa
gi|156538833	XP_001607988	-35.19	-139.5	32.53	9	4	PREDICTED: similar to lectin-related protein [Nasonia vitripennis]	18.4 kDa
gi|156552022	XP_001603702	-26.85	-70.98	5.51	8	4	PREDICTED: similar to lysosomal alpha-mannosidase (mannosidase alpha class 2b member 1) [Nasonia vitripennis]	114.4 kDa
gi|156538132	XP_001608247	-365.64	-1643.28	27.19	10	4	PREDICTED: similar to myosin light chain isoform 1 [Nasonia vitripennis]	24.3 kDa
gi|156538130	XP_001608248	-365.64	-1643.28	27.19	10	4	PREDICTED: similar to myosin light chain isoform 2 [Nasonia vitripennis]	24.3 kDa
gi|156543140	XP_001607772	-30.35	-92.81	12.11	9	4	PREDICTED: similar to phosphoribosylaminoimidazole carboxylase [Nasonia vitripennis]	46.7 kDa
gi|156536931	XP_001608129	-151.63	-599.66	31.09	24	4	PREDICTED: similar to ribosomal protein S7 [Nasonia vitripennis]	22.3 kDa
gi|156545922	XP_001599003	-72.35	-277.96	21.83	11	4	PREDICTED: similar to tropomyosin 1 [Nasonia vitripennis]	32.3 kDa
gi|156551982	XP_001601109	-25.69	-83.27	13.76	6	4	PREDICTED: similar to troponin T [Nasonia vitripennis]	48.3 kDa
gi|156554693	XP_001604994	-27.09	-93.96	13.88	6	3	PREDICTED: hypothetical protein [Nasonia vitripennis]	49.1 kDa
gi|156543324	XP_001606290	-26.31	-80.64	4.46	9	3	PREDICTED: similar to beta-1 tubulin [Nasonia vitripennis]	50.2 kDa
gi|156548992	XP_001607265	-13.89	-36.04	9.67	5	3	PREDICTED: similar to CG5320-PF [Nasonia vitripennis]	60.9 kDa
gi|156540730	XP_001599042	-12.31	-45.4	29.38	4	3	PREDICTED: similar to conserved hypothetical protein [Nasonia vitripennis]	21.5 kDa
gi|156548902	XP_001606654	-120.54	-429.01	7.76	23	3	PREDICTED: similar to cytochrome P450 CYP4AB1 [Nasonia vitripennis]	54.8 kDa
gi|156550103	XP_001605745	-95.96	-425.24	28.77	10	3	PREDICTED: similar to Endocuticle structural glycoprotein SgAbd-1 [Nasonia vitripennis]	15.6 kDa
gi|156542476	XP_001599672	-19.88	-72.37	14.43	4	3	PREDICTED: similar to ENSANGP00000014344 [Nasonia vitripennis]	43.9 kDa
gi|156537747	XP_001607992	-25.85	-86.89	13.1	6	3	PREDICTED: similar to ENSANGP00000014908 [Nasonia vitripennis]	54.3 kDa
gi|156540429	XP_001599280	-63.13	-244.15	12.16	11	3	PREDICTED: similar to ENSANGP00000022164 [Nasonia vitripennis]	34.8 kDa
gi|156536997	XP_001608288	-134.59	-548.71	29.84	24	3	PREDICTED: similar to ENSANGP00000031916 [Nasonia vitripennis]	13.4 kDa
gi|156536941	XP_001608227	-134.59	-548.71	29.6	24	3	PREDICTED: similar to ENSANGP00000031916 [Nasonia vitripennis]	13.4 kDa
gi|156539625	XP_001599199	-134.59	-548.71	29.6	24	3	PREDICTED: similar to ENSANGP00000031916 [Nasonia vitripennis]	13.4 kDa
gi|156544982	XP_001607947	-134.59	-548.71	29.6	24	3	PREDICTED: similar to ENSANGP00000031916 [Nasonia vitripennis]	13.4 kDa
gi|156548594	XP_001607717	-134.59	-548.71	29.6	24	3	PREDICTED: similar to ENSANGP00000031916 [Nasonia vitripennis]	13.4 kDa
gi|156544978	XP_001607931	-134.59	-548.71	29.6	24	3	PREDICTED: similar to ENSANGP00000031916 [Nasonia vitripennis]	13.4 kDa
gi|156544960	XP_001607585	-134.75	-549.44	29.6	24	3	PREDICTED: similar to ENSANGP00000031916 [Nasonia vitripennis]	13.4 kDa
gi|156545305	XP_001605491	-132.51	-552.9	41.11	24	3	PREDICTED: similar to ENSANGP00000031916 [Nasonia vitripennis]	9.6 kDa
gi|156539055	XP_001599770	-136.95	-559.56	29.6	24	3	PREDICTED: similar to ENSANGP00000031916 [Nasonia vitripennis]	13.4 kDa
gi|156545301	XP_001605462	-128.33	-536.08	41.11	23	3	PREDICTED: similar to ENSANGP00000031916 [Nasonia vitripennis]	9.6 kDa
gi|156549200	XP_001607826	-129.85	-532.77	29.6	22	3	PREDICTED: similar to ENSANGP00000031916 [Nasonia vitripennis]	13.4 kDa
gi|156544972	XP_001607891	-100.34	-399.86	29.6	21	3	PREDICTED: similar to ENSANGP00000031916 [Nasonia vitripennis]	13.4 kDa
gi|156544929	XP_001603712	-104.43	-424.63	29.6	19	3	PREDICTED: similar to ENSANGP00000031916 [Nasonia vitripennis]	13.4 kDa
gi|156544915	XP_001600014	-114.82	-470.84	27.21	18	3	PREDICTED: similar to ENSANGP00000031917 [Nasonia vitripennis]	14.6 kDa
gi|156548876	XP_001606447	-132.87	-539.71	28.24	23	3	PREDICTED: similar to ENSANGP00000032064 [Nasonia vitripennis]	14.2 kDa
gi|156553723	XP_001600828	-10.7	-29	9.98	4	3	PREDICTED: similar to GA19489-PA [Nasonia vitripennis]	53.8 kDa
gi|156553050	XP_001605179	-59.77	-236.64	30.14	12	3	PREDICTED: similar to GA19673-PA [Nasonia vitripennis]	15.8 kDa
gi|156549198	XP_001607824	-24.22	-90.02	33.53	6	3	PREDICTED: similar to glutathione S-transferase, partial [Nasonia vitripennis]	19.9 kDa
gi|156553185	XP_001600020	-22.86	-90.25	22.49	5	3	PREDICTED: similar to heat shock protein 1 [Nasonia vitripennis]	19.2 kDa
gi|156545575	XP_001607669	-21.78	-74.09	25.79	7	3	PREDICTED: similar to heat shock protein 20.6 isoform 1 [Nasonia vitripennis]	21.7 kDa
gi|156545579	XP_001607675	-21.78	-74.09	26.92	7	3	PREDICTED: similar to heat shock protein 20.6 isoform 2 [Nasonia vitripennis]	20.8 kDa
gi|156545577	XP_001607678	-21.78	-71.71	25.13	7	3	PREDICTED: similar to heat shock protein 20.6 isoform 3 [Nasonia vitripennis]	22.3 kDa
gi|156551611	XP_001600560	-18.68	-59.37	29.13	9	3	PREDICTED: similar to histone [Nasonia vitripennis]	11.3 kDa
gi|156544962	XP_001607557	-23.16	-79.57	31.07	9	3	PREDICTED: similar to histone H4 [Nasonia vitripennis]	11.4 kDa
gi|156538963	XP_001599832	-19.02	-66.52	33.01	7	3	PREDICTED: similar to histone H4 [Nasonia vitripennis]	11.4 kDa
gi|156538825	XP_001607975	-47.21	-171.87	11.51	8	3	PREDICTED: similar to Leukotriene A4 hydrolase [Nasonia vitripennis]	70.4 kDa
gi|156554110	XP_001599068	-14.38	-46.29	12.56	4	3	PREDICTED: similar to microsomal dipeptidase [Nasonia vitripennis]	47.2 kDa
gi|156555903	XP_001599313	-110.49	-456.96	29.73	17	3	PREDICTED: similar to myosin 2 light chain [Nasonia vitripennis]	16.5 kDa
gi|156545932	XP_001601068	-97.23	-370.39	19.4	25	3	PREDICTED: similar to odorant-binding protein 1 [Nasonia vitripennis]	14.5 kDa
gi|156554183	XP_001599986	-7.68	-19.38	9.87	3	3	PREDICTED: similar to phosphoglucose isomerase [Nasonia vitripennis]	62.2 kDa
gi|156536885	XP_001606843	-24.09	-95.37	19.04	3	3	PREDICTED: similar to phosphoglycerate kinase [Nasonia vitripennis]	44.5 kDa
gi|156549937	XP_001602658	-9.38	-20.37	18.05	6	3	PREDICTED: similar to putative alcohol dehydrogenase [Nasonia vitripennis]	29.6 kDa
gi|156548926	XP_001606826	-311.69	-1230.14	16.43	44	3	PREDICTED: similar to putative carboxypeptidase A-like [Nasonia vitripennis]	46.5 kDa
gi|156546791	XP_001607354	-37.75	-128.59	19	13	3	PREDICTED: similar to putative ferritin 2 [Nasonia vitripennis]	25.0 kDa
gi|156536891	XP_001607038	-146.73	-627.42	33.94	15	3	PREDICTED: similar to putative peptidyl-prolyl cis-trans isomerase isoform 1 [Nasonia vitripennis]	17.7 kDa
gi|156536889	XP_001607048	-146.73	-627.42	33.94	15	3	PREDICTED: similar to putative peptidyl-prolyl cis-trans isomerase isoform 2 [Nasonia vitripennis]	17.7 kDa
gi|156552786	XP_001600182	-29.15	-93.6	6.83	7	3	PREDICTED: similar to RE11240p [Nasonia vitripennis]	68.8 kDa
gi|156548258	XP_001600152	-26.73	-93.47	10.73	7	3	PREDICTED: similar to receptor for activated protein kinase C-like [Nasonia vitripennis]	35.8 kDa
gi|156545754	XP_001605427	-81.17	-318.52	17.81	14	3	PREDICTED: similar to short-chain dehydrogenase/reductase [Nasonia vitripennis]	27.6 kDa
gi|156541964	XP_001600119	-16.08	-61.86	26.72	3	3	PREDICTED: similar to triosephoshpate isomerase [Nasonia vitripennis]	26.8 kDa
gi|156549304	XP_001600380	-61.42	-233.84	7.26	10	2	PREDICTED: hypothetical protein [Nasonia vitripennis]	46.8 kDa
gi|156548942	XP_001607586	-20.39	-68.17	18.04	8	2	PREDICTED: hypothetical protein [Nasonia vitripennis]	22.0 kDa
gi|156549278	XP_001599978	-35.14	-129.16	6.48	7	2	PREDICTED: hypothetical protein [Nasonia vitripennis]	49.4 kDa
gi|156544532	XP_001607694	-61.35	-239.52	10.98	9	2	PREDICTED: similar to acetoacetyl-CoA thiolase [Nasonia vitripennis]	43.5 kDa
gi|156548392	XP_001603938	-606.81	-2772.16	10.9	5	2	PREDICTED: similar to aldo-keto reductase [Nasonia vitripennis]	36.0 kDa
gi|156543060	XP_001604662	-18.79	-64.64	4.41	4	2	PREDICTED: similar to alpha-glucosidase [Nasonia vitripennis]	67.7 kDa
gi|156542554	XP_001599353	-54.45	-217.81	11.22	7	2	PREDICTED: similar to aminoacylase, putative [Nasonia vitripennis]	45.4 kDa
gi|156542271	XP_001600751	-2.23	-1.3	11.76	2	2	PREDICTED: similar to Annexin IX-A [Nasonia vitripennis]	35.8 kDa
gi|156542532	XP_001599934	-8.41	-25.95	5.5	3	2	PREDICTED: similar to anterior fat body protein [Nasonia vitripennis]	34.0 kDa
gi|156548256	XP_001607280	-14.5	-56.43	18.34	3	2	PREDICTED: similar to calponin/transgelin [Nasonia vitripennis]	19.1 kDa
gi|156539800	XP_001600669	-35.26	-143.04	10.15	5	2	PREDICTED: similar to calreticulin, partial [Nasonia vitripennis]	31.1 kDa
gi|156538002	XP_001608200	-14.59	-51.36	7.56	3	2	PREDICTED: similar to carboxylesterase [Nasonia vitripennis]	61.7 kDa
gi|156543358	XP_001607969	-56.61	-217.67	11.54	10	2	PREDICTED: similar to CG31692-PB [Nasonia vitripennis]	36.9 kDa
gi|156548214	XP_001607090	-16.46	-42.58	1.63	4	2	PREDICTED: similar to CG3937-PD [Nasonia vitripennis]	258.3 kDa
gi|156544229	XP_001606909	-15.04	-59.38	11.86	3	2	PREDICTED: similar to chymotrypsin [Nasonia vitripennis]	27.3 kDa
gi|156554809	XP_001606183	-19.61	-61.56	15.73	7	2	PREDICTED: similar to CRALBP [Nasonia vitripennis]	29.3 kDa
gi|156553773	XP_001601805	-4.25	-8.36	6.57	2	2	PREDICTED: similar to cytochrome P450 [Nasonia vitripennis]	61.4 kDa
gi|156549469	XP_001606417	-13.27	-43.87	8.02	3	2	PREDICTED: similar to cytochrome P450 monooxygenase [Nasonia vitripennis]	63.5 kDa
gi|156543370	XP_001608218	-16.07	-65.45	13.83	2	2	PREDICTED: similar to electron-transfer-flavoprotein beta polypeptide [Nasonia vitripennis]	27.3 kDa
gi|156546090	XP_001601271	-10.93	-30.26	10.16	4	2	PREDICTED: similar to ENSANGP00000013071 [Nasonia vitripennis]	47.1 kDa
gi|156548972	XP_001607166	-20.33	-54.53	4.42	6	2	PREDICTED: similar to ENSANGP00000013147 [Nasonia vitripennis]	105.7 kDa
gi|156549170	XP_001607740	-21.71	-84.55	3.38	2	2	PREDICTED: similar to ENSANGP00000016875 [Nasonia vitripennis]	201.0 kDa
gi|156546398	XP_001607045	-187.04	-793.88	13.31	19	2	PREDICTED: similar to ENSANGP00000018364 [Nasonia vitripennis]	27.2 kDa
gi|156548829	XP_001605497	-15.95	-47.94	3.84	4	2	PREDICTED: similar to ENSANGP00000022801 [Nasonia vitripennis]	92.6 kDa
gi|156554853	XP_001606624	-34.51	-128.87	5.12	5	2	PREDICTED: similar to estradiol 17 beta-dehydrogenase [Nasonia vitripennis]	79.3 kDa
gi|156553129	XP_001599839	-14.09	-44.89	6.62	4	2	PREDICTED: similar to eukaryotic translation initiation factor 4A [Nasonia vitripennis]	47.7 kDa
gi|156542024	XP_001599993	-17.75	-74.09	14.23	2	2	PREDICTED: similar to fk506-binding protein [Nasonia vitripennis]	26.9 kDa
gi|156539967	XP_001599698	-15.53	-61.09	11.25	3	2	PREDICTED: similar to GA14756-PA [Nasonia vitripennis]	26.1 kDa
gi|156552988	XP_001604014	-43.67	-169.27	9.26	6	2	PREDICTED: similar to GA17761-PA [Nasonia vitripennis]	52.0 kDa
gi|156548988	XP_001607237	-19.1	-53.43	6.35	7	2	PREDICTED: similar to GH08974p [Nasonia vitripennis]	49.6 kDa
gi|156538907	XP_001602041	-19.1	-53.67	6.35	7	2	PREDICTED: similar to GH08974p [Nasonia vitripennis]	49.7 kDa
gi|156555350	XP_001604790	-9.94	-35.29	7.38	2	2	PREDICTED: similar to glutamate carboxypeptidase [Nasonia vitripennis]	57.5 kDa
gi|156552404	XP_001600977	-47.49	-180.08	23.76	10	2	PREDICTED: similar to Glutathione S-transferase (GST class-sigma) (Major allergen Bla g 5) [Nasonia vitripennis]	22.7 kDa
gi|156548632	XP_001608225	-10.13	-35.43	21.78	3	2	PREDICTED: similar to Glutathione S-transferase (GST class-sigma) (Major allergen Bla g 5) [Nasonia vitripennis]	22.6 kDa
gi|156551886	XP_001605456	-34.72	-132.26	13.86	7	2	PREDICTED: similar to glutathione S-transferase isoform 1 [Nasonia vitripennis]	23.6 kDa
gi|156551884	XP_001605470	-34.72	-132.26	13.86	7	2	PREDICTED: similar to glutathione S-transferase isoform 2 [Nasonia vitripennis]	23.6 kDa
gi|156544970	XP_001607855	-78.37	-327.22	14.42	9	2	PREDICTED: similar to glutathione-S-transferase-like protein [Nasonia vitripennis]	24.5 kDa
gi|156542817	XP_001607939	-51.63	-190.8	3.97	8	2	PREDICTED: similar to heat shock cognate 70 protein [Nasonia vitripennis]	71.3 kDa
gi|156547421	XP_001604560	-24.17	-73.85	2.84	5	2	PREDICTED: similar to laminin gamma 1 chain [Nasonia vitripennis]	179.2 kDa
gi|156551732	XP_001599607	-12.77	-38.12	7.66	4	2	PREDICTED: similar to LD46760p [Nasonia vitripennis]	52.3 kDa
gi|156541600	XP_001600671	-6.69	-16.17	5.71	3	2	PREDICTED: similar to low-density lipoprotein receptor (ldl) [Nasonia vitripennis]	49.0 kDa
gi|156548092	XP_001606344	-69.24	-276.39	7.14	8	2	PREDICTED: similar to MGC115145 protein [Nasonia vitripennis]	56.6 kDa
gi|156550388	XP_001599663	-67.61	-272.75	17.17	12	2	PREDICTED: similar to MPA3 allergen [Nasonia vitripennis]	24.9 kDa
gi|156555805	XP_001602443	-6.86	-24.57	12.12	2	2	PREDICTED: similar to peptidoglycan recognition protein-LC [Nasonia vitripennis]	22.1 kDa
gi|156554116	XP_001602967	-29.93	-107.52	9.38	6	2	PREDICTED: similar to protein disulfide isomerase [Nasonia vitripennis]	47.9 kDa
gi|156551045	XP_001604757	-16.17	-62.07	18.75	4	2	PREDICTED: similar to protein serine/threonine kinase, putative isoform 1 [Nasonia vitripennis]	14.5 kDa
gi|156551043	XP_001604805	-16.17	-62.07	18.75	4	2	PREDICTED: similar to protein serine/threonine kinase, putative isoform 2 [Nasonia vitripennis]	14.5 kDa
gi|156542504	XP_001600141	-89.42	-398.98	32.85	10	2	PREDICTED: similar to pupal cuticle protein 78E, putative, partial [Nasonia vitripennis]	14.5 kDa
gi|156537211	XP_001604902	-12.76	-46.08	8.36	3	2	PREDICTED: similar to purine nucleoside phosphorylase [Nasonia vitripennis]	36.2 kDa
gi|156548613	XP_001608082	-23.78	-87.05	8.83	6	2	PREDICTED: similar to putative 40S ribosomal protein SA [Nasonia vitripennis]	34.4 kDa
gi|156540296	XP_001599931	-41.77	-165.72	24.31	7	2	PREDICTED: similar to putative elongation factor 1 beta [Nasonia vitripennis]	24.4 kDa
gi|156551229	XP_001604366	-53.47	-221.45	11.11	6	2	PREDICTED: similar to RE22593p [Nasonia vitripennis]	34.1 kDa
gi|156543734	XP_001607874	-5.4	-16.72	14.74	2	2	PREDICTED: similar to ribosomal protein L14 [Nasonia vitripennis]	18.1 kDa
gi|156547850	XP_001604487	-13.64	-48.66	13.36	3	2	PREDICTED: similar to ribosomal protein L23Ae [Nasonia vitripennis]	26.7 kDa
gi|156536919	XP_001608023	-25.43	-99.39	8.35	3	2	PREDICTED: similar to ribosomal protein L4 [Nasonia vitripennis]	48.3 kDa
gi|156547504	XP_001602423	-944.32	-4326	41.96	13	2	PREDICTED: similar to ribosomal protein P1 [Nasonia vitripennis]	11.4 kDa
gi|156546944	XP_001605124	-74.31	-311.17	24.29	11	2	PREDICTED: similar to ribosomal protein S12 [Nasonia vitripennis]	15.3 kDa
gi|156546898	XP_001599736	-103.64	-448.58	27.89	10	2	PREDICTED: similar to ribosomal protein S15 [Nasonia vitripennis]	16.9 kDa
gi|156544938	XP_001607263	-27.95	-110.15	25.38	6	2	PREDICTED: similar to ribosomal protein S15A [Nasonia vitripennis]	14.7 kDa
gi|156542863	XP_001599933	-9.49	-29.37	8.02	3	2	PREDICTED: similar to ribosomal protein S4e [Nasonia vitripennis]	29.6 kDa
gi|156549869	XP_001599602	-7.3	-26.31	18.47	2	2	PREDICTED: similar to S10e ribosomal protein [Nasonia vitripennis]	17.7 kDa
gi|156554667	XP_001605646	-12.35	-52.76	36.64	2	2	PREDICTED: similar to serine-type enodpeptidase, putative, partial [Nasonia vitripennis]	13.7 kDa
gi|156537145	XP_001603591	-101.55	-396.58	3.99	13	2	PREDICTED: similar to Sorting and assembly machinery component 50 homolog (S. cerevisiae) [Nasonia vitripennis]	61.0 kDa
gi|156553897	XP_001601352	-25.65	-83.09	2.19	4	2	PREDICTED: similar to spectrin [Nasonia vitripennis]	278.5 kDa
gi|156546835	XP_001606332	-44.17	-178.38	9.68	5	2	PREDICTED: similar to sulfotransferase (sult) [Nasonia vitripennis]	39.8 kDa
gi|156554807	XP_001606170	-5.35	-14.39	2.25	2	2	PREDICTED: similar to teratocyte released chitinase [Nasonia vitripennis]	54.0 kDa
gi|156550408	XP_001600105	-11.04	-33.73	5.42	3	2	PREDICTED: similar to transketolase [Nasonia vitripennis]	67.9 kDa
gi|156551051	XP_001605644	-37.73	-142.75	15.12	9	2	PREDICTED: similar to translationally controlled tumor protein [Nasonia vitripennis]	19.9 kDa
gi|156541090	XP_001600234	-48.62	-182.65	5.37	9	2	PREDICTED: similar to Tubulin, beta 2c isoform 1 [Nasonia vitripennis]	50.5 kDa
gi|156541092	XP_001600261	-48.62	-179.95	4.76	9	2	PREDICTED: similar to Tubulin, beta 2c isoform 2 [Nasonia vitripennis]	57.1 kDa
gi|156547558	XP_001602538	-15.74	-55.46	9.94	4	2	PREDICTED: similar to venom carbohydrate-rich protein [Nasonia vitripennis]	38.3 kDa
gi|156552730	XP_001599502	-59.61	-211.3	7.04	10	2	PREDICTED: similar to zinc metalloprotease [Nasonia vitripennis]	84.5 kDa
gi|156538629	XP_001607645	-22.45	-76.24	5.8	6	1	PREDICTED: hypothetical protein [Nasonia vitripennis]	47.4 kDa
gi|156551710	XP_001600532	-54.93	-237.57	13.79	6	1	PREDICTED: hypothetical protein [Nasonia vitripennis]	12.7 kDa
gi|156547988	XP_001605306	-3.61	-10.8	7.92	2	1	PREDICTED: hypothetical protein [Nasonia vitripennis]	11.3 kDa
gi|156540630	XP_001599581	-7.51	-21.82	2.14	2	1	PREDICTED: hypothetical protein [Nasonia vitripennis]	113.5 kDa
gi|156549078	XP_001607506	-1.13	-0.02	2.73	1	1	PREDICTED: hypothetical protein [Nasonia vitripennis]	58.3 kDa
gi|156547711	XP_001605110	-2.54	-6.58	3.95	1	1	PREDICTED: hypothetical protein [Nasonia vitripennis]	49.1 kDa
gi|156554226	XP_001602522	-5.03	-18.8	4.95	1	1	PREDICTED: hypothetical protein [Nasonia vitripennis]	35.4 kDa
gi|156547510	XP_001603936	-4.61	-15.94	3.56	1	1	PREDICTED: similar to 26S proteasome regulatory complex ATPase RPT4 [Nasonia vitripennis]	44.6 kDa
gi|156542034	XP_001601016	-2.51	-8.15	7.18	1	1	PREDICTED: similar to 2-Cys thioredoxin peroxidase [Nasonia vitripennis]	21.7 kDa
gi|156541150	XP_001601398	-12.13	-49.25	8.85	3	1	PREDICTED: similar to 60S acidic ribosomal protein P2 [Nasonia vitripennis]	11.7 kDa
gi|156544271	XP_001606978	-10.03	-20.94	4.91	5	1	PREDICTED: similar to actin [Nasonia vitripennis]	49.1 kDa
gi|156542763	XP_001602492	-2.68	-9.12	8.78	1	1	PREDICTED: similar to actin-depolymerizing factor 4 [Nasonia vitripennis]	16.9 kDa
gi|156541938	XP_001601226	-8.39	-32.11	3.03	1	1	PREDICTED: similar to acyl-coa dehydrogenase [Nasonia vitripennis]	102.1 kDa
gi|156547293	XP_001606673	-14.79	-49.83	3.33	4	1	PREDICTED: similar to ADP/ATP translocase [Nasonia vitripennis]	32.6 kDa
gi|156551115	XP_001603449	-3.48	-5.82	5.06	2	1	PREDICTED: similar to aldehyde dehydrogenase [Nasonia vitripennis]	53.2 kDa
gi|156542273	XP_001601217	-2.65	-7.05	2.59	1	1	PREDICTED: similar to aldehyde dehydrogenase [Nasonia vitripennis]	56.2 kDa
gi|156538110	XP_001608212	-4.37	-16.89	6.16	1	1	PREDICTED: similar to alpha NAC [Nasonia vitripennis]	22.4 kDa
gi|156547465	XP_001605336	-13.5	-52.76	4.82	2	1	PREDICTED: similar to alpha-tubulin [Nasonia vitripennis]	47.8 kDa
gi|156549194	XP_001607799	-3.54	-2.71	2.44	2	1	PREDICTED: similar to ankyrin repeat protein, putative [Nasonia vitripennis]	128.6 kDa
gi|156541286	XP_001601341	-2.75	-4.35	0.63	1	1	PREDICTED: similar to ankyrin repeat protein, putative [Nasonia vitripennis]	245.7 kDa
gi|156542327	XP_001599692	-1.99	-3.46	4.9	1	1	PREDICTED: similar to apoptosis antagonizing transcription factor [Nasonia vitripennis]	58.6 kDa
gi|156554138	XP_001599025	-12.21	-48.54	19.88	3	1	PREDICTED: similar to ATP synthase 1 [Nasonia vitripennis]	17.1 kDa
gi|156548040	XP_001605871	-2.01	-7.08	19.82	1	1	PREDICTED: similar to BolA protein, putative [Nasonia vitripennis]	12.5 kDa
gi|156543199	XP_001606262	-23.37	-77.85	1.78	4	1	PREDICTED: similar to Ca/calmodulin-dependent protein kinase phosphatase-N [Nasonia vitripennis]	206.2 kDa
gi|156543541	XP_001603057	-3.09	-10.05	8.44	1	1	PREDICTED: similar to cactus maternal/zygotic protein [Nasonia vitripennis]	41.4 kDa
gi|156540043	XP_001600192	-19.75	-83.99	16.42	3	1	PREDICTED: similar to calreticulin, partial [Nasonia vitripennis]	15.8 kDa
gi|156540986	XP_001600442	-7.94	-23.21	3.31	2	1	PREDICTED: similar to carboxypeptidase A [Nasonia vitripennis]	115.5 kDa
gi|156537801	XP_001608062	-14.52	-57.55	4.41	2	1	PREDICTED: similar to carboxypeptidase A [Nasonia vitripennis]	48.6 kDa
gi|156542422	XP_001601414	-14.03	-59.37	7.71	1	1	PREDICTED: similar to catalase [Nasonia vitripennis]	50.2 kDa
gi|156537850	XP_001608094	-1.54	-0.86	2.54	1	1	PREDICTED: similar to CG11482-PA [Nasonia vitripennis]	76.1 kDa
gi|156553409	XP_001599017	-30.98	-117.74	5.54	5	1	PREDICTED: similar to CG12262-PA [Nasonia vitripennis]	45.2 kDa
gi|156550241	XP_001602182	-35.9	-153.25	4.84	2	1	PREDICTED: similar to CG17838-PE [Nasonia vitripennis]	72.1 kDa
gi|156546496	XP_001607440	-8.79	-35.25	3.3	1	1	PREDICTED: similar to CG2145-PA [Nasonia vitripennis]	70.3 kDa
gi|156548262	XP_001600739	-4.82	-15.08	5.83	2	1	PREDICTED: similar to CG3083-PA [Nasonia vitripennis]	24.9 kDa
gi|156537438	XP_001606987	-1.82	0.42	0.64	1	1	PREDICTED: similar to CG34146-PA [Nasonia vitripennis]	217.2 kDa
gi|156545150	XP_001602794	-4.52	-8.98	3.66	2	1	PREDICTED: similar to CG4170-PA [Nasonia vitripennis]	49.5 kDa
gi|156542548	XP_001599282	-304.55	-1395.96	4.18	1	1	PREDICTED: similar to CG5520-PA [Nasonia vitripennis]	90.6 kDa
gi|156547689	XP_001605494	-8.45	-34.13	14.14	2	1	PREDICTED: similar to CG6105-PA [Nasonia vitripennis]	10.9 kDa
gi|156537660	XP_001607857	-1.09	0.87	3.93	1	1	PREDICTED: similar to CG7023-PA [Nasonia vitripennis]	78.2 kDa
gi|156543770	XP_001606220	-1.78	-3.57	4.22	1	1	PREDICTED: similar to CG7422-PB [Nasonia vitripennis]	48.4 kDa
gi|156540734	XP_001599525	-5.43	-18.89	4.02	1	1	PREDICTED: similar to CG8542-PA [Nasonia vitripennis]	73.2 kDa
gi|156545392	XP_001606380	-1.2	0.81	2.7	1	1	PREDICTED: similar to CG8948-PA [Nasonia vitripennis]	89.7 kDa
gi|156553206	XP_001599732	-3.12	-3.23	3.01	2	1	PREDICTED: similar to CG8983-PA [Nasonia vitripennis]	56.1 kDa
gi|156553048	XP_001605145	-5.44	-21.04	10.8	1	1	PREDICTED: similar to CG9031-PA [Nasonia vitripennis]	32.3 kDa
gi|156548948	XP_001607032	-616.59	-2825.64	8.38	3	1	PREDICTED: similar to CG9149-PA [Nasonia vitripennis]	41.2 kDa
gi|156540229	XP_001601924	-11.15	-45.96	9.31	1	1	PREDICTED: similar to chaperonin [Nasonia vitripennis]	46.9 kDa
gi|156554920	XP_001606473	-16.52	-59.34	3.95	3	1	PREDICTED: similar to chaperonin subunit 6a zeta isoform 1 [Nasonia vitripennis]	58.0 kDa
gi|156544986	XP_001607995	-18.99	-41.69	1.01	6	1	PREDICTED: similar to clathrin heavy chain [Nasonia vitripennis]	192.2 kDa
gi|156545551	XP_001605446	-10.92	-38.11	5.64	3	1	PREDICTED: similar to conserved hypothetical protein [Nasonia vitripennis]	35.6 kDa
gi|156544189	XP_001606559	-4.44	-14.45	13.2	2	1	PREDICTED: similar to conserved hypothetical protein [Nasonia vitripennis]	22.6 kDa
gi|156551315	XP_001601678	-6.26	-22.17	7.97	2	1	PREDICTED: similar to conserved hypothetical protein [Nasonia vitripennis]	15.8 kDa
gi|156551555	XP_001601024	-10.41	-36.02	3.29	2	1	PREDICTED: similar to conserved hypothetical protein [Nasonia vitripennis]	71.7 kDa
gi|156554827	XP_001604838	-1.56	-1.85	2.44	1	1	PREDICTED: similar to conserved hypothetical protein [Nasonia vitripennis]	60.3 kDa
gi|156554908	XP_001603368	-2.03	-2.96	1.71	1	1	PREDICTED: similar to conserved hypothetical protein [Nasonia vitripennis]	66.1 kDa
gi|156544448	XP_001607631	-2.39	-6.14	5.98	1	1	PREDICTED: similar to conserved hypothetical protein [Nasonia vitripennis]	43.7 kDa
gi|156543427	XP_001600788	-2.69	-6.81	2.4	1	1	PREDICTED: similar to conserved hypothetical protein [Nasonia vitripennis]	58.5 kDa
gi|156555807	XP_001602825	-4.21	-16.41	11.79	1	1	PREDICTED: similar to conserved hypothetical protein [Nasonia vitripennis]	21.1 kDa
gi|156547745	XP_001605608	-1.35	2.6	0.45	1	1	PREDICTED: similar to cubulin [Nasonia vitripennis]	416.6 kDa
gi|156547120	XP_001602894	-11.89	-47.28	7.81	2	1	PREDICTED: similar to cuticle protein LCP65Ac [Nasonia vitripennis]	28.6 kDa
gi|156552848	XP_001600075	-2.91	-2.96	3.61	2	1	PREDICTED: similar to cystathionine beta-synthase [Nasonia vitripennis]	54.9 kDa
gi|156547261	XP_001601960	-33.06	-129.72	5.15	5	1	PREDICTED: similar to cystathionine gamma-lyase [Nasonia vitripennis]	42.7 kDa
gi|156546540	XP_001607165	-1.75	-5.54	15.67	1	1	PREDICTED: similar to cytochrome B5 (cytb5) [Nasonia vitripennis]	14.9 kDa
gi|156542933	XP_001603107	-1.73	-4.74	8.98	1	1	PREDICTED: similar to cytochrome c oxidase subunit IV [Nasonia vitripennis]	19.0 kDa
gi|156553602	XP_001599777	-8.95	-36.02	4.61	1	1	PREDICTED: similar to cytochrome P450 [Nasonia vitripennis]	56.8 kDa
gi|156545219	XP_001604221	-4.3	-14.06	2.29	1	1	PREDICTED: similar to cytochrome P450 monooxygenase [Nasonia vitripennis]	65.4 kDa
gi|156552410	XP_001600268	-15.49	-58.42	7.47	3	1	PREDICTED: similar to d-amino acid oxidase [Nasonia vitripennis]	30.9 kDa
gi|156544684	XP_001605302	-1.07	0.84	5.11	1	1	PREDICTED: similar to DEAH (Asp-Glu-Ala-His) box polypeptide 35 [Nasonia vitripennis]	76.6 kDa
gi|156550338	XP_001606045	-9.51	-39	13.73	2	1	PREDICTED: similar to death-associated protein-like protein [Nasonia vitripennis]	11.2 kDa
gi|156551692	XP_001601820	-4.3	-13.64	3.85	1	1	PREDICTED: similar to dipeptidyl peptidase iii [Nasonia vitripennis]	82.0 kDa
gi|156552675	XP_001599223	-1.55	-0.07	1.65	1	1	PREDICTED: similar to DNA cytosine-5 methyltransferase 3B2 [Nasonia vitripennis]	127.0 kDa
gi|156554349	XP_001603677	-1.27	1.92	1.25	1	1	PREDICTED: similar to echinus splice form 1 [Nasonia vitripennis]	214.0 kDa
gi|156550105	XP_001605762	-403.33	-1845.85	21.43	9	1	PREDICTED: similar to Endocuticle structural glycoprotein SgAbd-1 [Nasonia vitripennis]	13.5 kDa
gi|156553052	XP_001605216	-1.18	1.44	1.95	1	1	PREDICTED: similar to ENSANGP00000003008 [Nasonia vitripennis]	96.3 kDa
gi|156546108	XP_001601807	-11.02	-46.32	6.01	1	1	PREDICTED: similar to ENSANGP00000003967 [Nasonia vitripennis]	36.5 kDa
gi|156555436	XP_001605880	-1.16	3.06	0.97	1	1	PREDICTED: similar to ENSANGP00000005472 [Nasonia vitripennis]	282.0 kDa
gi|156550396	XP_001599791	-6.53	-26.56	5.62	1	1	PREDICTED: similar to ENSANGP00000006721 [Nasonia vitripennis]	28.4 kDa
gi|156548795	XP_001605557	-15.4	-53.21	2.68	3	1	PREDICTED: similar to ENSANGP00000010003 [Nasonia vitripennis]	73.4 kDa
gi|156550594	XP_001604019	-2.28	-5.23	5.01	1	1	PREDICTED: similar to ENSANGP00000010161 [Nasonia vitripennis]	39.5 kDa
gi|156540213	XP_001601921	-6.43	-20.43	7.79	2	1	PREDICTED: similar to ENSANGP00000011972 [Nasonia vitripennis]	35.0 kDa
gi|156553657	XP_001600604	-91.74	-387.87	11.33	8	1	PREDICTED: similar to ENSANGP00000012072 [Nasonia vitripennis]	29.2 kDa
gi|156547848	XP_001604320	-4.66	-14.81	2.39	1	1	PREDICTED: similar to ENSANGP00000012364 [Nasonia vitripennis]	119.6 kDa
gi|156542899	XP_001601265	-17.05	-70.18	17.35	3	1	PREDICTED: similar to ENSANGP00000012664 [Nasonia vitripennis]	11.0 kDa
gi|156539959	XP_001599129	-4.51	-11.24	6.95	2	1	PREDICTED: similar to ENSANGP00000013457 [Nasonia vitripennis]	58.0 kDa
gi|156548356	XP_001603617	-6.92	-20.89	2.64	2	1	PREDICTED: similar to ENSANGP00000013487 [Nasonia vitripennis]	66.2 kDa
gi|156541018	XP_001602925	-7.84	-28.15	7.19	2	1	PREDICTED: similar to ENSANGP00000014264 [Nasonia vitripennis]	34.9 kDa
gi|156553992	XP_001603280	-2.25	-0.37	6.88	2	1	PREDICTED: similar to ENSANGP00000014762 [Nasonia vitripennis]	45.8 kDa
gi|156553196	XP_001599943	-65.91	-287.26	6.55	7	1	PREDICTED: similar to ENSANGP00000014836 [Nasonia vitripennis]	25.1 kDa
gi|156545467	XP_001606876	-1.38	-1.09	3.52	1	1	PREDICTED: similar to ENSANGP00000016083 [Nasonia vitripennis]	62.5 kDa
gi|156553468	XP_001599697	-5.11	-18.81	4.6	1	1	PREDICTED: similar to ENSANGP00000016302 [Nasonia vitripennis]	46.8 kDa
gi|156551541	XP_001600683	-2.59	-1.97	4.01	2	1	PREDICTED: similar to ENSANGP00000018269 [Nasonia vitripennis]	61.1 kDa
gi|156553919	XP_001601890	-7.09	-27.36	2.85	1	1	PREDICTED: similar to ENSANGP00000018469 [Nasonia vitripennis]	58.0 kDa
gi|156537281	XP_001605923	-1.22	-2.89	16.03	1	1	PREDICTED: similar to ENSANGP00000019703 [Nasonia vitripennis]	15.3 kDa
gi|156538437	XP_001606217	-4.86	-15.61	2.49	1	1	PREDICTED: similar to ENSANGP00000020237 [Nasonia vitripennis]	103.8 kDa
gi|156537506	XP_001607401	-2.23	-3.84	3.2	1	1	PREDICTED: similar to ENSANGP00000021292 [Nasonia vitripennis]	97.6 kDa
gi|156542446	XP_001602882	-2.3	-6.66	2.56	1	1	PREDICTED: similar to ENSANGP00000021542 [Nasonia vitripennis]	33.4 kDa
gi|156540435	XP_001599720	-10.34	-33.19	1.63	2	1	PREDICTED: similar to ENSANGP00000022132 [Nasonia vitripennis]	125.8 kDa
gi|156539732	XP_001601693	-10.34	-41.86	12.33	2	1	PREDICTED: similar to ENSANGP00000022132 [Nasonia vitripennis]	16.5 kDa
gi|156540754	XP_001602485	-10.34	-42.16	15.38	2	1	PREDICTED: similar to ENSANGP00000022132 [Nasonia vitripennis]	13.6 kDa
gi|156545970	XP_001606869	-5.22	-17.08	1.54	1	1	PREDICTED: similar to ENSANGP00000022340 isoform 1 [Nasonia vitripennis]	137.9 kDa
gi|156545972	XP_001606877	-5.22	-17.28	1.7	1	1	PREDICTED: similar to ENSANGP00000022340 isoform 2 [Nasonia vitripennis]	125.5 kDa
gi|156538068	XP_001607498	-4.08	-14.8	4.41	1	1	PREDICTED: similar to ENSANGP00000022464 [Nasonia vitripennis]	29.8 kDa
gi|156553996	XP_001603331	-4.39	-9.98	2.48	2	1	PREDICTED: similar to ENSANGP00000022492 [Nasonia vitripennis]	52.7 kDa
gi|156555564	XP_001604694	-6.41	-24.34	6.69	1	1	PREDICTED: similar to ENSANGP00000023709 [Nasonia vitripennis]	62.7 kDa
gi|156552754	XP_001599897	-20.4	-81.03	2.65	2	1	PREDICTED: similar to ENSANGP00000026472 [Nasonia vitripennis]	98.6 kDa
gi|156549782	XP_001606327	-1.73	-3.92	5.94	1	1	PREDICTED: similar to ENSANGP00000029416 [Nasonia vitripennis]	33.0 kDa
gi|156547775	XP_001605936	-5.2	-18.88	2.36	1	1	PREDICTED: similar to esterase [Nasonia vitripennis]	61.6 kDa
gi|156549296	XP_001600207	-1.03	1.37	3.96	1	1	PREDICTED: similar to eukaryotic initiation factor 4B protein [Nasonia vitripennis]	62.5 kDa
gi|156552677	XP_001599303	-81.82	-343.65	6.11	9	1	PREDICTED: similar to eukaryotic translation initiation factor 3 subunit 5 epsilon-like protein [Nasonia vitripennis]	32.6 kDa
gi|156544923	XP_001602916	-4.22	-16.7	11.93	1	1	PREDICTED: similar to extracellular Cu/Zn superoxide dismutase [Nasonia vitripennis]	18.2 kDa
gi|156543378	XP_001599775	-1.31	-3.09	6.67	1	1	PREDICTED: similar to farnesoic acid o-methyltransferase-like isoform 1 protein, partial [Nasonia vitripennis]	32.7 kDa
gi|156554581	XP_001602523	-7.44	-25.77	6.78	2	1	PREDICTED: similar to fibroinase [Nasonia vitripennis]	37.9 kDa
gi|156546584	XP_001601902	-1.56	-2.87	4.8	1	1	PREDICTED: similar to fumarylacetoacetate hydrolase [Nasonia vitripennis]	46.3 kDa
gi|156547554	XP_001602455	-1.1	1.89	1.48	1	1	PREDICTED: similar to GA10757-PA [Nasonia vitripennis]	149.1 kDa
gi|156546088	XP_001601249	-1.96	-4.66	6.45	1	1	PREDICTED: similar to GA14484-PA [Nasonia vitripennis]	37.9 kDa
gi|156551920	XP_001607288	-1.06	-0.57	8.48	1	1	PREDICTED: similar to GA15248-PA [Nasonia vitripennis]	37.7 kDa
gi|156553016	XP_001604580	-1.66	-3.64	3.47	1	1	PREDICTED: similar to GA17770-PA [Nasonia vitripennis]	32.8 kDa
gi|156544812	XP_001606616	-3.95	-14.68	6.69	1	1	PREDICTED: similar to GA18288-PA [Nasonia vitripennis]	25.9 kDa
gi|156553799	XP_001601889	-2.5	-1.31	4.38	2	1	PREDICTED: similar to GA21085-PA [Nasonia vitripennis]	43.9 kDa
gi|156554542	XP_001605063	-7.15	-28.2	10.3	1	1	PREDICTED: similar to GA21314-PA [Nasonia vitripennis]	32.2 kDa
gi|156540453	XP_001599385	-3.36	-8.16	10.82	2	1	PREDICTED: similar to glucosamine-6-phosphate N-acetyltransferase [Nasonia vitripennis]	21.7 kDa
gi|156549030	XP_001607373	-70.89	-290.43	3.34	7	1	PREDICTED: similar to glycerol-3-phosphate dehydrogenase [Nasonia vitripennis]	46.2 kDa
gi|156545144	XP_001602678	-6.46	-22.89	1.73	1	1	PREDICTED: similar to glycinamide ribonucleotide synthetase-aminoimidazole ribonucleotide synthetase-glycinamide ribonucleotide transformylase [Nasonia vitripennis]	111.7 kDa
gi|156551167	XP_001604410	-10.57	-29.05	2.4	3	1	PREDICTED: similar to glycosyltransferase [Nasonia vitripennis]	109.4 kDa
gi|156547043	XP_001601273	-2.27	-4.63	3.08	1	1	PREDICTED: similar to GM01289p [Nasonia vitripennis]	65.6 kDa
gi|156545814	XP_001607760	-10.42	-42.82	3.78	1	1	PREDICTED: similar to GTP binding protein [Nasonia vitripennis]	44.7 kDa
gi|156547887	XP_001607898	-2.86	-9.56	6.94	1	1	PREDICTED: similar to H+ transporting ATP synthase subunit d [Nasonia vitripennis]	19.8 kDa
gi|156547889	XP_001608044	-5.34	-12.8	1.86	2	1	PREDICTED: similar to heat shock cognate 70 protein [Nasonia vitripennis]	70.6 kDa
gi|156553644	XP_001600436	-4.78	-15.66	1.99	1	1	PREDICTED: similar to heat shock protein [Nasonia vitripennis]	80.2 kDa
gi|156537036	XP_001601257	-20.31	-54.18	2.25	8	1	PREDICTED: similar to high-affinity Na+-dependent glutamate transporter [Nasonia vitripennis]	58.4 kDa
gi|156553474	XP_001600043	-48.6	-181.57	5	8	1	PREDICTED: similar to histone H2B [Nasonia vitripennis]	31.7 kDa
gi|156537898	XP_001608287	-48.6	-198.36	12.1	8	1	PREDICTED: similar to histone H2B [Nasonia vitripennis]	13.7 kDa
gi|156545108	XP_001603608	-48.6	-198.36	12.1	8	1	PREDICTED: similar to histone H2B [Nasonia vitripennis]	13.7 kDa
gi|156545384	XP_001607918	-48.6	-198.36	12.1	8	1	PREDICTED: similar to histone H2B [Nasonia vitripennis]	13.7 kDa
gi|156545382	XP_001607906	-48.6	-198.36	12.1	8	1	PREDICTED: similar to histone H2B [Nasonia vitripennis]	13.7 kDa
gi|156548974	XP_001607725	-48.6	-198.36	12.1	8	1	PREDICTED: similar to histone H2B [Nasonia vitripennis]	13.7 kDa
gi|156538971	XP_001599909	-48.6	-198.36	12.1	8	1	PREDICTED: similar to histone H2B [Nasonia vitripennis]	13.7 kDa
gi|156537632	XP_001608226	-48.6	-198.36	12.1	8	1	PREDICTED: similar to histone H2B [Nasonia vitripennis]	13.7 kDa
gi|156548874	XP_001607191	-48.6	-198.36	12.1	8	1	PREDICTED: similar to histone H2B [Nasonia vitripennis]	13.7 kDa
gi|156545307	XP_001607523	-48.6	-198.36	12.1	8	1	PREDICTED: similar to histone H2B [Nasonia vitripennis]	13.7 kDa
gi|156545386	XP_001607945	-48.6	-198.36	12.1	8	1	PREDICTED: similar to histone H2B [Nasonia vitripennis]	13.7 kDa
gi|156549202	XP_001608234	-48.6	-198.36	12.1	8	1	PREDICTED: similar to histone H2B [Nasonia vitripennis]	13.7 kDa
gi|156548904	XP_001606665	-48.6	-202.43	14.56	8	1	PREDICTED: similar to histone H2B [Nasonia vitripennis]	11.7 kDa
gi|156538969	XP_001602196	-48.6	-185.87	6.47	8	1	PREDICTED: similar to histone H2B, partial [Nasonia vitripennis]	24.9 kDa
gi|156550779	XP_001606375	-4.42	-10.09	4.25	2	1	PREDICTED: similar to hydroxyacyl dehydrogenase subunit B/thiolase [Nasonia vitripennis]	51.3 kDa
gi|156541431	XP_001599381	-4.17	-12.62	1.37	1	1	PREDICTED: similar to importin beta-1 [Nasonia vitripennis]	130.0 kDa
gi|156547453	XP_001605180	-1.28	0.44	1.2	1	1	PREDICTED: similar to importin beta-4 [Nasonia vitripennis]	121.8 kDa
gi|156549853	XP_001606880	-4.8	-7.31	3.22	3	1	PREDICTED: similar to IP11896p [Nasonia vitripennis]	51.4 kDa
gi|156547353	XP_001602895	-2.01	-4.52	5.36	1	1	PREDICTED: similar to juvenile hormone epoxide hydrolase [Nasonia vitripennis]	52.8 kDa
gi|156546464	XP_001607321	-10.43	-27.45	1.54	3	1	PREDICTED: similar to kinectin, partial [Nasonia vitripennis]	95.7 kDa
gi|156552349	XP_001601945	-1.24	0.96	3.23	1	1	PREDICTED: similar to kinesin-like protein KIF23 (mitotic kinesin-like protein 1) (kinesin-like protein 5) [Nasonia vitripennis]	95.1 kDa
gi|156537105	XP_001602749	-17.26	-51.15	3	6	1	PREDICTED: similar to kynurenine aminotransferase [Nasonia vitripennis]	48.8 kDa
gi|156548282	XP_001605843	-5.45	-19.97	6.18	1	1	PREDICTED: similar to LD23157p [Nasonia vitripennis]	49.4 kDa
gi|156545611	XP_001604870	-1.63	-4.17	4.74	1	1	PREDICTED: similar to lectin 4 C-type lectin [Nasonia vitripennis]	26.5 kDa
gi|156541598	XP_001599595	-3.74	-8.16	3.64	2	1	PREDICTED: similar to low-density lipoprotein receptor (ldl) [Nasonia vitripennis]	37.1 kDa
gi|156537187	XP_001604542	-20.7	-91.81	5.71	2	1	PREDICTED: similar to LP21747p [Nasonia vitripennis]	28.8 kDa
gi|156537832	XP_001608277	-2.71	-7.08	3.14	1	1	PREDICTED: similar to malic enzyme [Nasonia vitripennis]	63.5 kDa
gi|156554505	XP_001605026	-2.76	-7.25	5.11	1	1	PREDICTED: similar to malic enzyme [Nasonia vitripennis]	67.6 kDa
gi|156537033	XP_001601130	-4.78	-15.87	2.16	1	1	PREDICTED: similar to mCG14932 [Nasonia vitripennis]	72.5 kDa
gi|156550614	XP_001604362	-20.6	-81.5	3.63	3	1	PREDICTED: similar to metalloprotease [Nasonia vitripennis]	43.0 kDa
gi|156553741	XP_001601270	-1.27	-1.91	4.51	1	1	PREDICTED: similar to MGC114658 protein [Nasonia vitripennis]	26.5 kDa
gi|156546550	XP_001607558	-2.58	-8.24	6.35	1	1	PREDICTED: similar to MGC79752 protein [Nasonia vitripennis]	26.9 kDa
gi|156541238	XP_001600919	-5.91	-18.84	9.77	2	1	PREDICTED: similar to microtubule-associated protein RP/EB family member 3 isoform 1 [Nasonia vitripennis]	29.9 kDa
gi|156541236	XP_001600969	-5.91	-18.61	9.15	2	1	PREDICTED: similar to microtubule-associated protein RP/EB family member 3 isoform 2 [Nasonia vitripennis]	31.7 kDa
gi|156538713	XP_001607816	-1.77	-4.14	6.3	1	1	PREDICTED: similar to mitochondrial ATP synthase b chain [Nasonia vitripennis]	27.4 kDa
gi|156538140	XP_001608258	-3.8	-12.36	2.73	1	1	PREDICTED: similar to mitochondrial processing peptidase beta subunit [Nasonia vitripennis]	53.4 kDa
gi|156550390	XP_001599689	-1.43	-2.95	10.47	1	1	PREDICTED: similar to MPA3 allergen [Nasonia vitripennis]	28.0 kDa
gi|156548254	XP_001607274	-1.6	-3.69	8.37	1	1	PREDICTED: similar to muscular protein 20 [Nasonia vitripennis]	22.7 kDa
gi|156553423	XP_001599498	-1.13	3.45	0.76	1	1	PREDICTED: similar to mutated in ataxia telangiectasia [Nasonia vitripennis]	285.7 kDa
gi|156552278	XP_001600652	-4.76	-4.02	1.62	3	1	PREDICTED: similar to Na/Ca exchange protein isoform 1 [Nasonia vitripennis]	95.7 kDa
gi|156552276	XP_001600904	-4.76	-4.02	1.62	3	1	PREDICTED: similar to Na/Ca exchange protein isoform 2 [Nasonia vitripennis]	95.6 kDa
gi|156540976	XP_001599876	-1.01	-1.33	11.49	1	1	PREDICTED: similar to nanos-like protein [Nasonia vitripennis]	19.8 kDa
gi|156554076	XP_001600035	-2.27	-4.34	2.5	1	1	PREDICTED: similar to neutral endopeptidase 24.11 [Nasonia vitripennis]	87.1 kDa
gi|156544199	XP_001606594	-2.47	-5.07	2.58	1	1	PREDICTED: similar to neutral sphingomyelinase (n-smase) activation associated factor fan [Nasonia vitripennis]	101.6 kDa
gi|156555652	XP_001603746	-2.59	-6.43	4.81	1	1	PREDICTED: similar to nucleolar KKE/D repeat protein; DmNOP56 [Nasonia vitripennis]	57.9 kDa
gi|156552665	XP_001599764	-20.45	-89.53	9.93	2	1	PREDICTED: similar to nucleoplasmin-like protein [Nasonia vitripennis]	15.6 kDa
gi|156549726	XP_001605700	-5.63	-8.83	0.83	2	1	PREDICTED: similar to p270 [Nasonia vitripennis]	266.3 kDa
gi|156549724	XP_001605685	-11.71	-36.15	0.65	2	1	PREDICTED: similar to p270 [Nasonia vitripennis]	339.8 kDa
gi|156552627	XP_001600555	-4.81	-12.35	4.79	2	1	PREDICTED: similar to phenylalanine hydroxylase [Nasonia vitripennis]	52.2 kDa
gi|156546926	XP_001603243	-1.34	-2.58	8.61	1	1	PREDICTED: similar to phosphatidylethanolamine-binding protein isoform 1 [Nasonia vitripennis]	23.2 kDa
gi|156546930	XP_001603265	-1.34	-2.79	9.89	1	1	PREDICTED: similar to phosphatidylethanolamine-binding protein isoform 2 [Nasonia vitripennis]	20.4 kDa
gi|156546928	XP_001603288	-1.34	-2.79	9.89	1	1	PREDICTED: similar to phosphatidylethanolamine-binding protein isoform 3 [Nasonia vitripennis]	20.4 kDa
gi|156543362	XP_001608132	-43.75	-182.3	12.08	5	1	PREDICTED: similar to phospholipid-hydroperoxide glutathione peroxidase [Nasonia vitripennis]	23.4 kDa
gi|156551650	XP_001600620	-19.84	-63.37	8.2	6	1	PREDICTED: similar to Phosphoserine aminotransferase 1 [Nasonia vitripennis]	40.5 kDa
gi|156551407	XP_001603759	-1.45	-1.69	2.28	1	1	PREDICTED: similar to pickpocket 4 long form [Nasonia vitripennis]	50.5 kDa
gi|156554126	XP_001604025	-1.54	-1.09	2.23	1	1	PREDICTED: similar to poly A binding protein isoform 1 [Nasonia vitripennis]	69.8 kDa
gi|156554128	XP_001604076	-1.54	-1.01	2.18	1	1	PREDICTED: similar to poly A binding protein isoform 2 [Nasonia vitripennis]	71.4 kDa
gi|156554130	XP_001604125	-1.54	-1.12	2.3	1	1	PREDICTED: similar to poly A binding protein isoform 3 [Nasonia vitripennis]	67.9 kDa
gi|156552611	XP_001599434	-17.91	-3.7	1.42	11	1	PREDICTED: similar to polyubiquitin [Nasonia vitripennis]	102.4 kDa
gi|156544011	XP_001607865	-19.8	-79.6	9.54	3	1	PREDICTED: similar to porin [Nasonia vitripennis]	30.2 kDa
gi|156549232	XP_001605395	-1.51	-3.48	12	1	1	PREDICTED: similar to predicted ER protein with RDEL retention signal [Nasonia vitripennis]	22.9 kDa
gi|156554914	XP_001606036	-14.37	-54.32	2.75	2	1	PREDICTED: similar to prophenoloxidase [Nasonia vitripennis]	79.3 kDa
gi|156538018	XP_001608208	-2.62	-3.41	0.45	1	1	PREDICTED: similar to protease m1 zinc metalloprotease [Nasonia vitripennis]	304.2 kDa
gi|156539935	XP_001599218	-1.35	-3.24	6.34	1	1	PREDICTED: similar to proteasome beta 3 subunit [Nasonia vitripennis]	22.9 kDa
gi|156542502	XP_001600091	-101.27	-446.48	17.76	10	1	PREDICTED: similar to pupal cuticle protein 78E, putative [Nasonia vitripennis]	16.5 kDa
gi|156547118	XP_001602867	-11.82	-50.57	21.51	3	1	PREDICTED: similar to pupal cuticle protein 78E, putative, partial [Nasonia vitripennis]	10.3 kDa
gi|156549973	XP_001603697	-347.43	-1579.42	12.19	5	1	PREDICTED: similar to putative alcohol dehydrogenase [Nasonia vitripennis]	31.2 kDa
gi|156536899	XP_001607323	-25.6	-95.83	11.83	6	1	PREDICTED: similar to putative beta-NAC-like protein [Nasonia vitripennis]	20.1 kDa
gi|156542281	XP_001601633	-2.12	-6.33	13.04	1	1	PREDICTED: similar to putative chemosensory protein 1 [Nasonia vitripennis]	16.1 kDa
gi|156546622	XP_001602766	-28.92	-115.11	7.22	5	1	PREDICTED: similar to putative chymotrypsin-like protein [Nasonia vitripennis]	31.0 kDa
gi|156551940	XP_001607748	-96.94	-403.02	13.59	12	1	PREDICTED: similar to putative muscular protein 20 [Nasonia vitripennis]	20.4 kDa
gi|156540081	XP_001600011	-2.21	-7.09	8.44	1	1	PREDICTED: similar to putative prohibitin [Nasonia vitripennis]	17.0 kDa
gi|156551916	XP_001607057	-7.34	-30.02	13.49	1	1	PREDICTED: similar to putative rab11 [Nasonia vitripennis]	24.4 kDa
gi|156544948	XP_001607509	-48.6	-188.28	5.42	8	1	PREDICTED: similar to putative Rho1 [Nasonia vitripennis]	31.2 kDa
gi|156539925	XP_001600310	-1.63	-4.05	10.16	1	1	PREDICTED: similar to putative ribosomal protein Ubq/L40e isoform 1 [Nasonia vitripennis]	14.7 kDa
gi|156539923	XP_001600340	-1.63	-4.05	10.16	1	1	PREDICTED: similar to putative ribosomal protein Ubq/L40e isoform 2 [Nasonia vitripennis]	14.7 kDa
gi|156546413	XP_001607107	-1.85	-4.32	5.41	1	1	PREDICTED: similar to pyridoxal kinase [Nasonia vitripennis]	32.9 kDa
gi|156548765	XP_001604584	-2.64	-7.7	8.56	1	1	PREDICTED: similar to pyruvate dehydrogenase [Nasonia vitripennis]	39.3 kDa
gi|156543348	XP_001607839	-1.91	-6.41	13.49	1	1	PREDICTED: similar to RH02823p [Nasonia vitripennis]	13.9 kDa
gi|156541126	XP_001601669	-2.18	-4.39	2.62	1	1	PREDICTED: similar to ribophorin ii [Nasonia vitripennis]	71.4 kDa
gi|156544263	XP_001607270	-4.99	-18.81	7.18	1	1	PREDICTED: similar to ribosomal protein L11 [Nasonia vitripennis]	22.2 kDa
gi|156549881	XP_001605642	-2.97	-7.17	5.45	2	1	PREDICTED: similar to ribosomal protein L12 [Nasonia vitripennis]	17.8 kDa
gi|156547540	XP_001607573	-12.91	-50.94	5.95	2	1	PREDICTED: similar to ribosomal protein L17 [Nasonia vitripennis]	21.3 kDa
gi|156547881	XP_001607758	-2.98	-9.44	7.45	1	1	PREDICTED: similar to ribosomal protein L18e [Nasonia vitripennis]	21.6 kDa
gi|156536951	XP_001608245	-2.68	-8.31	10.06	1	1	PREDICTED: similar to ribosomal protein L21 [Nasonia vitripennis]	18.2 kDa
gi|156552242	XP_001607671	-3.05	-6.19	5.37	2	1	PREDICTED: similar to ribosomal protein L27a [Nasonia vitripennis]	16.9 kDa
gi|156544034	XP_001600115	-28.22	-101.49	5.01	5	1	PREDICTED: similar to ribosomal protein L3 [Nasonia vitripennis]	47.5 kDa
gi|156543527	XP_001602733	-1.49	-3.17	12.28	1	1	PREDICTED: similar to ribosomal protein L44e [Nasonia vitripennis]	13.7 kDa
gi|156550715	XP_001607539	-5.17	-18.71	5.47	1	1	PREDICTED: similar to ribosomal protein L7e [Nasonia vitripennis]	30.1 kDa
gi|156547530	XP_001607020	-1.34	-1.32	8.17	1	1	PREDICTED: similar to ribosomal protein L8 isoform 1 [Nasonia vitripennis]	28.1 kDa
gi|156547532	XP_001607030	-1.34	-1.32	8.17	1	1	PREDICTED: similar to ribosomal protein L8 isoform 2 [Nasonia vitripennis]	28.1 kDa
gi|156553504	XP_001600790	-16.94	-59.47	12.14	5	1	PREDICTED: similar to ribosomal protein S13e [Nasonia vitripennis]	15.8 kDa
gi|156542773	XP_001602816	-14.57	-55.09	7.14	3	1	PREDICTED: similar to ribosomal protein S19e [Nasonia vitripennis]	17.4 kDa
gi|156550181	XP_001604681	-8.63	-25.57	5.04	3	1	PREDICTED: similar to ribosomal protein S2 [Nasonia vitripennis]	30.0 kDa
gi|156553817	XP_001605674	-4.39	-14.13	9.92	2	1	PREDICTED: similar to ribosomal protein S20 [Nasonia vitripennis]	13.7 kDa
gi|156550149	XP_001607153	-4.73	-14.61	12.31	2	1	PREDICTED: similar to ribosomal protein S24e [Nasonia vitripennis]	15.2 kDa
gi|156551219	XP_001602185	-1.63	-3.85	8.33	1	1	PREDICTED: similar to ribosomal protein S27a [Nasonia vitripennis]	17.9 kDa
gi|156543328	XP_001606958	-7.48	-31.12	18.46	2	1	PREDICTED: similar to ribosomal protein S28e-like protein [Nasonia vitripennis]	7.4 kDa
gi|156553282	XP_001599651	-4.3	-15.47	7.02	1	1	PREDICTED: similar to ribosomal protein S3e [Nasonia vitripennis]	26.7 kDa
gi|156554296	XP_001602465	-1.44	-3.3	9.93	1	1	PREDICTED: similar to S14e ribosomal protein [Nasonia vitripennis]	16.2 kDa
gi|156552609	XP_001599093	-38.49	-164.4	16.79	4	1	PREDICTED: similar to S17e ribosomal protein [Nasonia vitripennis]	15.3 kDa
gi|156542046	XP_001601390	-4.03	-10.43	4.85	2	1	PREDICTED: similar to S18e ribosomal protein [Nasonia vitripennis]	19.0 kDa
gi|156548312	XP_001600581	-1.73	-4.17	8.39	1	1	PREDICTED: similar to S23e ribosomal protein [Nasonia vitripennis]	16.0 kDa
gi|156542777	XP_001603571	-3.57	-9.94	1.3	1	1	PREDICTED: similar to sarco(endo)plasmic reticulum-type calcium ATPase [Nasonia vitripennis]	110.0 kDa
gi|156546152	XP_001603117	-7.74	-31.25	3.24	1	1	PREDICTED: similar to serine protease [Nasonia vitripennis]	71.2 kDa
gi|156553020	XP_001604672	-17.06	-65.81	4.74	3	1	PREDICTED: similar to serine-type enodpeptidase, putative [Nasonia vitripennis]	30.4 kDa
gi|156551599	XP_001602488	-24.25	-100.84	8.09	3	1	PREDICTED: similar to serine-type enodpeptidase, putative [Nasonia vitripennis]	29.4 kDa
gi|156548064	XP_001606152	-56.9	-217.45	2.35	9	1	PREDICTED: similar to serpin [Nasonia vitripennis]	47.9 kDa
gi|156546038	XP_001600199	-4	-14.37	6.8	1	1	PREDICTED: similar to short-chain dehydrogenase [Nasonia vitripennis]	33.6 kDa
gi|156554371	XP_001604098	-4.61	-6.07	2.84	3	1	PREDICTED: similar to SHQ1 homolog (S. cerevisiae) [Nasonia vitripennis]	60.1 kDa
gi|156548019	XP_001605625	-1.44	-0.81	2.59	1	1	PREDICTED: similar to Sorting nexin 14 [Nasonia vitripennis]	86.9 kDa
gi|156554240	XP_001601239	-1.12	0.24	3.53	1	1	PREDICTED: similar to stathmin [Nasonia vitripennis]	35.1 kDa
gi|156538905	XP_001602010	-1.02	-0.38	3.23	1	1	PREDICTED: similar to teratocyte released chitinase, partial [Nasonia vitripennis]	34.8 kDa
gi|156545100	XP_001601690	-5.08	-16.74	5.42	2	1	PREDICTED: similar to tetraspanin F139 [Nasonia vitripennis]	26.4 kDa
gi|156548334	XP_001603220	-2.31	-5.59	4.27	1	1	PREDICTED: similar to thioredoxin reductase [Nasonia vitripennis]	58.9 kDa
gi|156551013	XP_001604990	-1.15	0.79	3.16	1	1	PREDICTED: similar to timeless homolog (Drosophila) [Nasonia vitripennis]	76.7 kDa
gi|156552169	XP_001605876	-6.02	-11.02	2.8	3	1	PREDICTED: similar to transcriptional adaptor 3 [Nasonia vitripennis]	52.2 kDa
gi|156544887	XP_001607864	-15.24	-56.42	9.57	4	1	PREDICTED: similar to transgelin [Nasonia vitripennis]	20.7 kDa
gi|156553460	XP_001604505	-11.06	-46.52	8	1	1	PREDICTED: similar to translation initiation factor eif-2b [Nasonia vitripennis]	38.1 kDa
gi|156553823	XP_001606297	-4.31	-18.91	21.1	1	1	PREDICTED: similar to transmembrane protein 14C [Nasonia vitripennis]	11.3 kDa
gi|156554552	XP_001605564	-4.92	-13.89	10.07	2	1	PREDICTED: similar to transmembrane protein, putative [Nasonia vitripennis]	33.9 kDa
gi|156547621	XP_001603693	-1.87	-2.39	3.51	1	1	PREDICTED: similar to trehalose 6-phosphate synthase [Nasonia vitripennis]	89.8 kDa
gi|156551239	XP_001605874	-5.25	-18.65	8.81	2	1	PREDICTED: similar to troponin C isoform 1 [Nasonia vitripennis]	18.2 kDa
gi|156551241	XP_001605892	-5.25	-18.65	9.21	2	1	PREDICTED: similar to troponin C isoform 2 [Nasonia vitripennis]	17.4 kDa
gi|156538004	XP_001608201	-46.36	-178.92	4.99	7	1	PREDICTED: similar to ubiquinol-cytochrome c reductase core protein II [Nasonia vitripennis]	47.0 kDa
gi|156543768	XP_001606199	-23.36	-90.98	3.53	3	1	PREDICTED: similar to UDP-glucose pyrophosphorylase [Nasonia vitripennis]	57.6 kDa
gi|156548580	XP_001607505	-1	-0.8	13.57	1	1	PREDICTED: similar to vacuolar sorting protein [Nasonia vitripennis]	24.4 kDa
gi|156538350	XP_001604685	-17.94	-65.74	2.77	3	1	PREDICTED: similar to V-ATPase subunit A [Nasonia vitripennis]	67.9 kDa
gi|156542319	XP_001599533	-2.06	-4.3	3.29	1	1	PREDICTED: similar to xaa-pro dipeptidase pepd/pepq(e.coli) [Nasonia vitripennis]	57.5 kDa

## Sheet: DP8
gi#	Accession	log.E-Value Sum	Protein Score	%Coverage	#Pep.	#Unique Pep.	Protein Description	MW
gi|156545565	XP_001607012	-6532.59	-22686.2	58.45	1213	43	PREDICTED: similar to hexamerin 2 [Nasonia vitripennis]	83.7 kDa
gi|156538313	XP_001604024	-574.75	-1590.96	18.94	113	41	PREDICTED: similar to apolipophorin [Nasonia vitripennis]	374.8 kDa
gi|156542452	XP_001599110	-30902.4	-132285	61.45	1755	37	PREDICTED: similar to high Glx storage protein [Nasonia vitripennis]	102.6 kDa
gi|156542989	XP_001603025	-1.#J	-1.#J	52.97	1150	32	PREDICTED: similar to high Glx storage protein [Nasonia vitripennis]	108.2 kDa
gi|156544337	XP_001607303	-466.57	-1633.78	18.23	60	23	PREDICTED: similar to CG17927-PF [Nasonia vitripennis]	224.5 kDa
gi|156545567	XP_001607029	-5802.54	-25589	52.12	192	22	PREDICTED: similar to hexamerin [Nasonia vitripennis]	81.6 kDa
gi|156545718	XP_001604915	-536.75	-1934.78	31.46	86	22	PREDICTED: similar to hexamerin [Nasonia vitripennis]	94.8 kDa
gi|156537243	XP_001605359	-855.89	-3357.76	39.11	107	18	PREDICTED: similar to protein disulfide isomerase [Nasonia vitripennis]	55.7 kDa
gi|156548062	XP_001606111	-530.45	-1946.01	35.65	90	12	PREDICTED: similar to serpin 6 [Nasonia vitripennis]	58.9 kDa
gi|156541821	XP_001600369	-167.35	-608.51	29.34	32	11	PREDICTED: similar to beta-hexosaminidase b [Nasonia vitripennis]	61.0 kDa
gi|156554292	XP_001601054	-85.08	-294.68	42.74	21	11	PREDICTED: similar to putative fructose 1,6-bisphosphate aldolase [Nasonia vitripennis]	39.4 kDa
gi|156551117	XP_001601759	-589.21	-2254.13	38.17	89	10	PREDICTED: similar to aldehyde dehydrogenase [Nasonia vitripennis]	51.2 kDa
gi|156541819	XP_001600338	-164.69	-600.35	29.15	31	10	PREDICTED: similar to beta-hexosaminidase b [Nasonia vitripennis]	56.0 kDa
gi|156542175	XP_001600960	-1215.04	-5371.4	41.22	50	10	PREDICTED: similar to RE12057p isoform 1 [Nasonia vitripennis]	41.8 kDa
gi|156541054	XP_001601342	-1204.22	-5326.05	41.22	49	10	PREDICTED: similar to RE12057p isoform 1 [Nasonia vitripennis]	41.8 kDa
gi|156544486	XP_001602474	-361.33	-1473.07	65.79	56	9	PREDICTED: similar to apolipophorin-III [Nasonia vitripennis]	20.8 kDa
gi|156546948	XP_001605607	-262.27	-1007.39	36.88	37	9	PREDICTED: similar to elongation factor 1-alpha isoform 1 [Nasonia vitripennis]	50.2 kDa
gi|156546950	XP_001605623	-262.27	-1011.97	39.81	37	9	PREDICTED: similar to elongation factor 1-alpha isoform 2 [Nasonia vitripennis]	46.7 kDa
gi|156541962	XP_001600045	-827.12	-3637.64	25.7	30	9	PREDICTED: similar to ENSANGP00000014839 [Nasonia vitripennis]	60.6 kDa
gi|156542177	XP_001600991	-1199.51	-5329.25	42.23	46	9	PREDICTED: similar to RE12057p isoform 2 [Nasonia vitripennis]	37.8 kDa
gi|156541056	XP_001601369	-1188.69	-5283.66	42.23	45	9	PREDICTED: similar to RE12057p isoform 2 [Nasonia vitripennis]	37.8 kDa
gi|156549032	XP_001607937	-66.29	-235.31	36.31	15	9	PREDICTED: similar to sn-glycerol-3-phosphate dehydrogenase [Nasonia vitripennis]	40.5 kDa
gi|156549563	XP_001607238	-187.59	-676.51	21.79	33	8	PREDICTED: similar to ENSANGP00000024604 isoform 1 [Nasonia vitripennis]	59.1 kDa
gi|156549565	XP_001607253	-187.59	-675.36	21.56	33	8	PREDICTED: similar to ENSANGP00000024604 isoform 2 [Nasonia vitripennis]	59.7 kDa
gi|156549941	XP_001602718	-518.96	-2148.58	49.62	62	8	PREDICTED: similar to putative alcohol dehydrogenase [Nasonia vitripennis]	29.2 kDa
gi|156554900	XP_001600911	-1199.52	-5326.83	33.24	44	8	PREDICTED: similar to RE12057p isoform 1 [Nasonia vitripennis]	41.8 kDa
gi|156554898	XP_001600934	-1199.52	-5326.83	33.24	44	8	PREDICTED: similar to RE12057p isoform 2 [Nasonia vitripennis]	41.8 kDa
gi|156548942	XP_001607586	-59.24	-218.1	53.09	17	7	PREDICTED: hypothetical protein [Nasonia vitripennis]	22.0 kDa
gi|156547846	XP_001604160	-215.93	-841.77	25.78	33	7	PREDICTED: similar to alpha tubulin [Nasonia vitripennis]	50.0 kDa
gi|156548149	XP_001607699	-215.93	-842.43	25.78	33	7	PREDICTED: similar to alpha tubulin [Nasonia vitripennis]	50.0 kDa
gi|156548568	XP_001606870	-200.1	-774.15	25.78	32	7	PREDICTED: similar to alpha tubulin [Nasonia vitripennis]	50.0 kDa
gi|156538985	XP_001600854	-406.08	-1788.42	39.17	20	7	PREDICTED: similar to beta-1 tubulin, partial [Nasonia vitripennis]	37.3 kDa
gi|156542436	XP_001599772	-107.54	-409.68	30.42	19	7	PREDICTED: similar to ENSANGP00000014344 [Nasonia vitripennis]	42.4 kDa
gi|156544237	XP_001606813	-123.92	-438.79	20.13	27	7	PREDICTED: similar to ENSANGP00000029516 [Nasonia vitripennis]	48.2 kDa
gi|156540778	XP_001599305	-100.48	-347.65	26.09	23	7	PREDICTED: similar to imaginal disc growth factor [Nasonia vitripennis]	48.3 kDa
gi|156548276	XP_001604985	-1290.57	-5764	45.73	51	7	PREDICTED: similar to lethal(2)essential for life protein, l2efl [Nasonia vitripennis]	23.0 kDa
gi|156553655	XP_001600547	-423.05	-1841.18	40.18	24	7	PREDICTED: similar to mitochondrial malate dehydrogenase [Nasonia vitripennis]	35.9 kDa
gi|156554902	XP_001601057	-1183.99	-5283.19	33.43	40	7	PREDICTED: similar to RE12057p isoform 3 [Nasonia vitripennis]	37.9 kDa
gi|156542010	XP_001599268	-53.62	-161.31	11.17	12	7	PREDICTED: similar to standard paramyosin [Nasonia vitripennis]	102.4 kDa
gi|156550530	XP_001602460	-132.69	-432.86	16.45	27	7	PREDICTED: similar to translation elongation factor 2 [Nasonia vitripennis]	96.5 kDa
gi|156549304	XP_001600380	-87.98	-316.91	19.37	18	6	PREDICTED: hypothetical protein [Nasonia vitripennis]	46.8 kDa
gi|156552398	XP_001600211	-180.45	-743.17	37.32	28	6	PREDICTED: similar to conserved hypothetical protein [Nasonia vitripennis]	23.2 kDa
gi|156545557	XP_001606463	-42.91	-131.49	11.99	11	6	PREDICTED: similar to ENSANGP00000012893 [Nasonia vitripennis]	72.7 kDa
gi|156551075	XP_001602774	-155.65	-599.53	12.47	19	6	PREDICTED: similar to ENSANGP00000016878 [Nasonia vitripennis]	92.3 kDa
gi|156547891	XP_001608047	-208.21	-874.13	44.7	26	6	PREDICTED: similar to fatty acid binding protein isoform 1 [Nasonia vitripennis]	15.0 kDa
gi|156546548	XP_001607360	-754.22	-3390.11	36.74	23	6	PREDICTED: similar to ferritin [Nasonia vitripennis]	24.1 kDa
gi|156545754	XP_001605427	-261.59	-1042.79	44.94	41	6	PREDICTED: similar to short-chain dehydrogenase/reductase [Nasonia vitripennis]	27.6 kDa
gi|156552724	XP_001599431	-1129.39	-5030.79	13.83	27	6	PREDICTED: similar to zinc metalloprotease [Nasonia vitripennis]	90.3 kDa
gi|156551934	XP_001607542	-124.24	-487.49	26.41	18	5	PREDICTED: hypothetical protein [Nasonia vitripennis]	36.4 kDa
gi|156539999	XP_001598993	-75.42	-297.31	29.51	15	5	PREDICTED: hypothetical protein [Nasonia vitripennis]	21.3 kDa
gi|156548392	XP_001603938	-455.51	-2008.52	32.09	20	5	PREDICTED: similar to aldo-keto reductase [Nasonia vitripennis]	36.0 kDa
gi|156545978	XP_001607122	-47.57	-170.21	16.62	10	5	PREDICTED: similar to arginine kinase-like protein [Nasonia vitripennis]	39.9 kDa
gi|156548582	XP_001607513	-79.72	-293.47	13.18	13	5	PREDICTED: similar to bifunctional purine biosynthesis protein [Nasonia vitripennis]	64.3 kDa
gi|156547751	XP_001605713	-106.67	-397.7	14.42	16	5	PREDICTED: similar to CG5397-PA [Nasonia vitripennis]	80.4 kDa
gi|156537668	XP_001607866	-49.07	-183.37	34.13	12	5	PREDICTED: similar to Chymotrypsin-2 (Chymotrypsin II) [Nasonia vitripennis]	27.3 kDa
gi|156537672	XP_001607871	-27.98	-96.17	27.86	8	5	PREDICTED: similar to Chymotrypsin-2 (Chymotrypsin II) [Nasonia vitripennis]	35.5 kDa
gi|156548902	XP_001606654	-435.38	-1900.83	9.64	19	5	PREDICTED: similar to cytochrome P450 CYP4AB1 [Nasonia vitripennis]	54.8 kDa
gi|156539055	XP_001599770	-436.61	-1948.43	36.8	21	5	PREDICTED: similar to ENSANGP00000031916 [Nasonia vitripennis]	13.4 kDa
gi|156544929	XP_001603712	-128.15	-536.79	36.8	18	5	PREDICTED: similar to ENSANGP00000031916 [Nasonia vitripennis]	13.4 kDa
gi|156539625	XP_001599199	-403.35	-1807.14	36.8	17	5	PREDICTED: similar to ENSANGP00000031916 [Nasonia vitripennis]	13.4 kDa
gi|156536941	XP_001608227	-403.35	-1807.14	36.8	17	5	PREDICTED: similar to ENSANGP00000031916 [Nasonia vitripennis]	13.4 kDa
gi|156549200	XP_001607826	-403.35	-1807.14	36.8	17	5	PREDICTED: similar to ENSANGP00000031916 [Nasonia vitripennis]	13.4 kDa
gi|156548594	XP_001607717	-403.35	-1807.14	36.8	17	5	PREDICTED: similar to ENSANGP00000031916 [Nasonia vitripennis]	13.4 kDa
gi|156536997	XP_001608288	-403.35	-1807.14	37.1	17	5	PREDICTED: similar to ENSANGP00000031916 [Nasonia vitripennis]	13.4 kDa
gi|156544978	XP_001607931	-403.35	-1807.14	36.8	17	5	PREDICTED: similar to ENSANGP00000031916 [Nasonia vitripennis]	13.4 kDa
gi|156544972	XP_001607891	-392.27	-1759.08	36.8	16	5	PREDICTED: similar to ENSANGP00000031916 [Nasonia vitripennis]	13.4 kDa
gi|156544915	XP_001600014	-441.93	-1970.8	33.82	20	5	PREDICTED: similar to ENSANGP00000031917 [Nasonia vitripennis]	14.6 kDa
gi|156548876	XP_001606447	-455.46	-2028.44	35.11	22	5	PREDICTED: similar to ENSANGP00000032064 [Nasonia vitripennis]	14.2 kDa
gi|156542024	XP_001599993	-116.48	-490.41	24.69	12	5	PREDICTED: similar to fk506-binding protein [Nasonia vitripennis]	26.9 kDa
gi|156547538	XP_001607474	-293.04	-1200.1	25.45	34	5	PREDICTED: similar to glyceraldehyde-3-phosphate dehydrogenase [Nasonia vitripennis]	35.6 kDa
gi|156543677	XP_001605350	-87.91	-309.87	12.07	15	5	PREDICTED: similar to hydroxyacyl-coenzyme A dehydrogenase [Nasonia vitripennis]	82.1 kDa
gi|156552022	XP_001603702	-88.24	-340.51	9.21	10	5	PREDICTED: similar to lysosomal alpha-mannosidase (mannosidase alpha class 2b member 1) [Nasonia vitripennis]	114.4 kDa
gi|156538132	XP_001608247	-783.2	-3529.69	29.95	19	5	PREDICTED: similar to myosin light chain isoform 1 [Nasonia vitripennis]	24.3 kDa
gi|156538130	XP_001608248	-783.2	-3529.69	29.95	19	5	PREDICTED: similar to myosin light chain isoform 2 [Nasonia vitripennis]	24.3 kDa
gi|156554914	XP_001606036	-15.86	-37.54	11.14	6	5	PREDICTED: similar to prophenoloxidase [Nasonia vitripennis]	79.3 kDa
gi|156555799	XP_001601504	-1100.58	-4947.35	19.95	27	5	PREDICTED: similar to RE12057p isoform 1 [Nasonia vitripennis]	41.8 kDa
gi|156555801	XP_001601591	-1100.58	-4954.07	21.99	27	5	PREDICTED: similar to RE12057p isoform 2 [Nasonia vitripennis]	37.9 kDa
gi|156545922	XP_001599003	-30.62	-105.88	26.76	7	5	PREDICTED: similar to tropomyosin 1 [Nasonia vitripennis]	32.3 kDa
gi|156552722	XP_001599405	-1101.13	-4921.03	13.42	24	5	PREDICTED: similar to zinc metalloprotease [Nasonia vitripennis]	83.4 kDa
gi|156545944	XP_001603380	-49.13	-189.02	8.37	7	4	PREDICTED: hypothetical protein [Nasonia vitripennis]	56.6 kDa
gi|156542554	XP_001599353	-162.29	-653.3	19.7	20	4	PREDICTED: similar to aminoacylase, putative [Nasonia vitripennis]	45.4 kDa
gi|156553669	XP_001602360	-375.37	-1674.85	15.92	12	4	PREDICTED: similar to beta-tubulin [Nasonia vitripennis]	49.9 kDa
gi|156551487	XP_001605133	-50.5	-202.87	30.55	8	4	PREDICTED: similar to ENSANGP00000010625 [Nasonia vitripennis]	29.8 kDa
gi|156545301	XP_001605462	-445.94	-2005.88	41.11	20	4	PREDICTED: similar to ENSANGP00000031916 [Nasonia vitripennis]	9.6 kDa
gi|156544960	XP_001607585	-430.13	-1924.51	29.6	19	4	PREDICTED: similar to ENSANGP00000031916 [Nasonia vitripennis]	13.4 kDa
gi|156545305	XP_001605491	-430.56	-1942.19	41.11	17	4	PREDICTED: similar to ENSANGP00000031916 [Nasonia vitripennis]	9.6 kDa
gi|156544982	XP_001607947	-402.28	-1805.17	36.8	16	4	PREDICTED: similar to ENSANGP00000031916 [Nasonia vitripennis]	13.4 kDa
gi|156553129	XP_001599839	-11.89	-34.74	12.29	4	4	PREDICTED: similar to eukaryotic translation initiation factor 4A [Nasonia vitripennis]	47.7 kDa
gi|156547893	XP_001608053	-168.75	-717.77	27.27	18	4	PREDICTED: similar to fatty acid binding protein isoform 2 [Nasonia vitripennis]	15.1 kDa
gi|156543557	XP_001603460	-40.4	-141.23	16.92	10	4	PREDICTED: similar to GA17427-PA [Nasonia vitripennis]	51.1 kDa
gi|156537922	XP_001608147	-68.86	-263.48	17.41	10	4	PREDICTED: similar to GA18703-PA [Nasonia vitripennis]	61.4 kDa
gi|156545144	XP_001602678	-73.24	-268.67	6.07	10	4	PREDICTED: similar to glycinamide ribonucleotide synthetase-aminoimidazole ribonucleotide synthetase-glycinamide ribonucleotide transformylase [Nasonia vitripennis]	111.7 kDa
gi|156547421	XP_001604560	-40.85	-143.14	5.26	6	4	PREDICTED: similar to laminin gamma 1 chain [Nasonia vitripennis]	179.2 kDa
gi|156548092	XP_001606344	-23.55	-87.25	14.88	4	4	PREDICTED: similar to MGC115145 protein [Nasonia vitripennis]	56.6 kDa
gi|156536885	XP_001606843	-29.06	-92.29	23.37	8	4	PREDICTED: similar to phosphoglycerate kinase [Nasonia vitripennis]	44.5 kDa
gi|156543140	XP_001607772	-27.59	-80.09	10.93	9	4	PREDICTED: similar to phosphoribosylaminoimidazole carboxylase [Nasonia vitripennis]	46.7 kDa
gi|156536931	XP_001608129	-173.1	-682.12	31.09	28	4	PREDICTED: similar to ribosomal protein S7 [Nasonia vitripennis]	22.3 kDa
gi|156553875	XP_001600932	-80.41	-330.68	16.5	8	3	PREDICTED: similar to 4-hydroxyphenylpyruvate dioxygenase [Nasonia vitripennis]	47.2 kDa
gi|156544532	XP_001607694	-88.1	-348.38	13.66	12	3	PREDICTED: similar to acetoacetyl-CoA thiolase [Nasonia vitripennis]	43.5 kDa
gi|156542763	XP_001602492	-17.98	-66.73	27.7	5	3	PREDICTED: similar to actin-depolymerizing factor 4 [Nasonia vitripennis]	16.9 kDa
gi|156548256	XP_001607280	-24.09	-86.83	29.59	7	3	PREDICTED: similar to calponin/transgelin [Nasonia vitripennis]	19.1 kDa
gi|156540986	XP_001600442	-59.34	-219.79	5.84	8	3	PREDICTED: similar to carboxypeptidase A [Nasonia vitripennis]	115.5 kDa
gi|156543358	XP_001607969	-37.88	-152.93	11.83	5	3	PREDICTED: similar to CG31692-PB [Nasonia vitripennis]	36.9 kDa
gi|156546036	XP_001600126	-17.92	-66.13	10.91	3	3	PREDICTED: similar to CG4898-PB [Nasonia vitripennis]	39.3 kDa
gi|156544229	XP_001606909	-20.55	-84.76	23.32	3	3	PREDICTED: similar to chymotrypsin [Nasonia vitripennis]	27.3 kDa
gi|156548615	XP_001608103	-40.92	-170.13	24.67	7	3	PREDICTED: similar to CuZn superoxide dismutase [Nasonia vitripennis]	15.4 kDa
gi|156553110	XP_001599656	-81.94	-315.6	9.04	10	3	PREDICTED: similar to cxpwmw03 [Nasonia vitripennis]	80.2 kDa
gi|156555286	XP_001605157	-49.47	-192.47	12.05	8	3	PREDICTED: similar to cytosolic malate dehydrogenase [Nasonia vitripennis]	35.9 kDa
gi|156542191	XP_001600781	-28.55	-72.21	6.72	11	3	PREDICTED: similar to Elongation factor 1-alpha (EF-1-alpha) [Nasonia vitripennis]	50.6 kDa
gi|156550103	XP_001605745	-456.44	-2073.67	45.89	17	3	PREDICTED: similar to Endocuticle structural glycoprotein SgAbd-1 [Nasonia vitripennis]	15.6 kDa
gi|156553196	XP_001599943	-30.38	-123.62	19.21	7	3	PREDICTED: similar to ENSANGP00000014836 [Nasonia vitripennis]	25.1 kDa
gi|156537747	XP_001607992	-97.5	-390	13.72	11	3	PREDICTED: similar to ENSANGP00000014908 [Nasonia vitripennis]	54.3 kDa
gi|156538074	XP_001607543	-47.93	-170.56	32.07	14	3	PREDICTED: similar to ENSANGP00000022132 [Nasonia vitripennis]	25.5 kDa
gi|156555564	XP_001604694	-38.09	-144.45	13.56	6	3	PREDICTED: similar to ENSANGP00000023709 [Nasonia vitripennis]	62.7 kDa
gi|156553050	XP_001605179	-61.48	-254.16	30.14	9	3	PREDICTED: similar to GA19673-PA [Nasonia vitripennis]	15.8 kDa
gi|156555785	XP_001603238	-92.49	-375.6	7.22	10	3	PREDICTED: similar to GH08974p [Nasonia vitripennis]	51.3 kDa
gi|156552404	XP_001600977	-34.74	-129.1	32.67	8	3	PREDICTED: similar to Glutathione S-transferase (GST class-sigma) (Major allergen Bla g 5) [Nasonia vitripennis]	22.7 kDa
gi|156545575	XP_001607669	-45.5	-172.1	25.79	10	3	PREDICTED: similar to heat shock protein 20.6 isoform 1 [Nasonia vitripennis]	21.7 kDa
gi|156545579	XP_001607675	-45.5	-172.1	26.92	10	3	PREDICTED: similar to heat shock protein 20.6 isoform 2 [Nasonia vitripennis]	20.8 kDa
gi|156545577	XP_001607678	-45.5	-168.72	25.13	10	3	PREDICTED: similar to heat shock protein 20.6 isoform 3 [Nasonia vitripennis]	22.3 kDa
gi|156544504	XP_001605191	-17.81	-50.02	6.71	5	3	PREDICTED: similar to heat shock protein 90 [Nasonia vitripennis]	82.1 kDa
gi|156552551	XP_001599009	-5.22	-14.75	31.07	3	3	PREDICTED: similar to histone H4 [Nasonia vitripennis]	11.4 kDa
gi|156553444	XP_001599591	-5.22	-15.01	31.07	3	3	PREDICTED: similar to histone H4 [Nasonia vitripennis]	11.4 kDa
gi|156536993	XP_001608285	-5.22	-15.01	31.07	3	3	PREDICTED: similar to histone H4 [Nasonia vitripennis]	11.4 kDa
gi|156544962	XP_001607557	-5.22	-15.01	31.07	3	3	PREDICTED: similar to histone H4 [Nasonia vitripennis]	11.4 kDa
gi|156553446	XP_001599471	-5.22	-15.01	31.07	3	3	PREDICTED: similar to histone H4 [Nasonia vitripennis]	11.4 kDa
gi|156540342	XP_001599230	-5.22	-15.01	31.07	3	3	PREDICTED: similar to histone H4 [Nasonia vitripennis]	11.4 kDa
gi|156536987	XP_001608282	-5.22	-15.01	31.07	3	3	PREDICTED: similar to histone H4 [Nasonia vitripennis]	11.4 kDa
gi|156548574	XP_001607199	-5.22	-15.01	31.07	3	3	PREDICTED: similar to histone H4 [Nasonia vitripennis]	11.4 kDa
gi|156548636	XP_001608236	-5.22	-15.01	31.07	3	3	PREDICTED: similar to histone H4 [Nasonia vitripennis]	11.4 kDa
gi|156548578	XP_001607366	-5.22	-15.01	31.07	3	3	PREDICTED: similar to histone H4 [Nasonia vitripennis]	11.4 kDa
gi|156544980	XP_001607925	-5.22	-15.01	31.07	3	3	PREDICTED: similar to histone H4 [Nasonia vitripennis]	11.4 kDa
gi|156545932	XP_001601068	-202.63	-762.9	19.4	55	3	PREDICTED: similar to odorant-binding protein 1 [Nasonia vitripennis]	14.5 kDa
gi|156552868	XP_001600528	-9.64	-33.76	32.66	3	3	PREDICTED: similar to oxidoreductase [Nasonia vitripennis]	26.8 kDa
gi|156541477	XP_001600227	-15.06	-38.22	8.13	5	3	PREDICTED: similar to phosphoenolpyruvate carboxykinase [Nasonia vitripennis]	80.9 kDa
gi|156548926	XP_001606826	-332.32	-1348.49	16.43	39	3	PREDICTED: similar to putative carboxypeptidase A-like [Nasonia vitripennis]	46.5 kDa
gi|156540296	XP_001599931	-67.78	-274.09	29.82	10	3	PREDICTED: similar to putative elongation factor 1 beta [Nasonia vitripennis]	24.4 kDa
gi|156536891	XP_001607038	-139.86	-595.8	33.94	15	3	PREDICTED: similar to putative peptidyl-prolyl cis-trans isomerase isoform 1 [Nasonia vitripennis]	17.7 kDa
gi|156536889	XP_001607048	-139.86	-595.8	33.94	15	3	PREDICTED: similar to putative peptidyl-prolyl cis-trans isomerase isoform 2 [Nasonia vitripennis]	17.7 kDa
gi|156547504	XP_001602423	-342.03	-1561.11	41.96	8	3	PREDICTED: similar to ribosomal protein P1 [Nasonia vitripennis]	11.4 kDa
gi|156548064	XP_001606152	-148.63	-535.89	11.5	30	3	PREDICTED: similar to serpin [Nasonia vitripennis]	47.9 kDa
gi|156550408	XP_001600105	-54.83	-224	10.21	5	3	PREDICTED: similar to transketolase [Nasonia vitripennis]	67.9 kDa
gi|156551051	XP_001605644	-78.33	-329.71	35.47	9	3	PREDICTED: similar to translationally controlled tumor protein [Nasonia vitripennis]	19.9 kDa
gi|156541964	XP_001600119	-78.24	-315.7	28.34	11	3	PREDICTED: similar to triosephoshpate isomerase [Nasonia vitripennis]	26.8 kDa
gi|156554693	XP_001604994	-51.66	-196.88	7.29	8	2	PREDICTED: hypothetical protein [Nasonia vitripennis]	49.1 kDa
gi|156548544	XP_001604360	-32.88	-125.1	11.24	5	2	PREDICTED: hypothetical protein [Nasonia vitripennis]	49.0 kDa
gi|156549278	XP_001599978	-10.88	-36.1	9.49	3	2	PREDICTED: hypothetical protein [Nasonia vitripennis]	49.4 kDa
gi|156537932	XP_001608155	-15.58	-60.42	21.97	3	2	PREDICTED: hypothetical protein [Nasonia vitripennis]	38.5 kDa
gi|156536927	XP_001608110	-12.01	-39.43	16.86	4	2	PREDICTED: similar to 3-hydroxyacyl-CoA dehydrogenase type II isoform 1 [Nasonia vitripennis]	26.9 kDa
gi|156536929	XP_001608111	-12.01	-39.32	16.54	4	2	PREDICTED: similar to 3-hydroxyacyl-CoA dehydrogenase type II isoform 2 [Nasonia vitripennis]	27.4 kDa
gi|156541150	XP_001601398	-5.7	-21.86	20.35	2	2	PREDICTED: similar to 60S acidic ribosomal protein P2 [Nasonia vitripennis]	11.7 kDa
gi|156547293	XP_001606673	-10.71	-35.63	7.67	3	2	PREDICTED: similar to ADP/ATP translocase [Nasonia vitripennis]	32.6 kDa
gi|156538110	XP_001608212	-34.24	-135.14	13.27	7	2	PREDICTED: similar to alpha NAC [Nasonia vitripennis]	22.4 kDa
gi|156542532	XP_001599934	-9.28	-29.96	7.77	3	2	PREDICTED: similar to anterior fat body protein [Nasonia vitripennis]	34.0 kDa
gi|156554138	XP_001599025	-15.05	-56.49	29.81	5	2	PREDICTED: similar to ATP synthase 1 [Nasonia vitripennis]	17.1 kDa
gi|156543324	XP_001606290	-24.76	-77.99	4.24	8	2	PREDICTED: similar to beta-1 tubulin [Nasonia vitripennis]	50.2 kDa
gi|156539800	XP_001600669	-38.97	-160.13	14.66	5	2	PREDICTED: similar to calreticulin, partial [Nasonia vitripennis]	31.1 kDa
gi|156540043	XP_001600192	-10.13	-39.67	23.13	3	2	PREDICTED: similar to calreticulin, partial [Nasonia vitripennis]	15.8 kDa
gi|156537801	XP_001608062	-20.95	-82.48	9.98	3	2	PREDICTED: similar to carboxypeptidase A [Nasonia vitripennis]	48.6 kDa
gi|156548992	XP_001607265	-6.2	-11.81	8.03	3	2	PREDICTED: similar to CG5320-PF [Nasonia vitripennis]	60.9 kDa
gi|156542548	XP_001599282	-21.17	-84.42	6.96	2	2	PREDICTED: similar to CG5520-PA [Nasonia vitripennis]	90.6 kDa
gi|156545551	XP_001605446	-19.49	-65.42	14.42	6	2	PREDICTED: similar to conserved hypothetical protein [Nasonia vitripennis]	35.6 kDa
gi|156547120	XP_001602894	-52.09	-206.2	21.88	9	2	PREDICTED: similar to cuticle protein LCP65Ac [Nasonia vitripennis]	28.6 kDa
gi|156555907	XP_001603146	-6.17	-15.57	5.32	2	2	PREDICTED: similar to cytochrome P450 [Nasonia vitripennis]	107.7 kDa
gi|156543370	XP_001608218	-34.3	-145.12	14.62	3	2	PREDICTED: similar to electron-transfer-flavoprotein beta polypeptide [Nasonia vitripennis]	27.3 kDa
gi|156550105	XP_001605762	-96.87	-435.85	42.06	8	2	PREDICTED: similar to Endocuticle structural glycoprotein SgAbd-1 [Nasonia vitripennis]	13.5 kDa
gi|156547848	XP_001604320	-7.16	-19.69	3.86	2	2	PREDICTED: similar to ENSANGP00000012364 [Nasonia vitripennis]	119.6 kDa
gi|156548972	XP_001607166	-51.11	-176.71	4.42	9	2	PREDICTED: similar to ENSANGP00000013147 [Nasonia vitripennis]	105.7 kDa
gi|156546522	XP_001606212	-29.52	-104	11.28	7	2	PREDICTED: similar to ENSANGP00000013285 [Nasonia vitripennis]	41.6 kDa
gi|156546398	XP_001607045	-807.67	-3651.99	13.31	19	2	PREDICTED: similar to ENSANGP00000018364 [Nasonia vitripennis]	27.2 kDa
gi|156552049	XP_001603900	-31.38	-129.61	15.17	7	2	PREDICTED: similar to ENSANGP00000019735 [Nasonia vitripennis]	15.7 kDa
gi|156542446	XP_001602882	-25.38	-101.1	10.58	4	2	PREDICTED: similar to ENSANGP00000021542 [Nasonia vitripennis]	33.4 kDa
gi|156540429	XP_001599280	-40.68	-161.96	9.12	6	2	PREDICTED: similar to ENSANGP00000022164 [Nasonia vitripennis]	34.8 kDa
gi|156537219	XP_001605059	-47.61	-153.26	0.88	8	2	PREDICTED: similar to fatty acid synthase [Nasonia vitripennis]	261.0 kDa
gi|156539967	XP_001599698	-5.83	-19.86	11.25	2	2	PREDICTED: similar to GA14756-PA [Nasonia vitripennis]	26.1 kDa
gi|156552988	XP_001604014	-33.47	-132.91	9.26	4	2	PREDICTED: similar to GA17761-PA [Nasonia vitripennis]	52.0 kDa
gi|156553723	XP_001600828	-16.39	-65.33	10.18	2	2	PREDICTED: similar to GA19489-PA [Nasonia vitripennis]	53.8 kDa
gi|156548632	XP_001608225	-17.68	-70.21	23.76	3	2	PREDICTED: similar to Glutathione S-transferase (GST class-sigma) (Major allergen Bla g 5) [Nasonia vitripennis]	22.6 kDa
gi|156551886	XP_001605456	-7.21	-25.32	17.82	2	2	PREDICTED: similar to glutathione S-transferase isoform 1 [Nasonia vitripennis]	23.6 kDa
gi|156551884	XP_001605470	-7.21	-25.32	17.82	2	2	PREDICTED: similar to glutathione S-transferase isoform 2 [Nasonia vitripennis]	23.6 kDa
gi|156544970	XP_001607855	-42.94	-179.03	14.42	5	2	PREDICTED: similar to glutathione-S-transferase-like protein [Nasonia vitripennis]	24.5 kDa
gi|156542817	XP_001607939	-19.46	-66.13	4.58	4	2	PREDICTED: similar to heat shock cognate 70 protein [Nasonia vitripennis]	71.3 kDa
gi|156551611	XP_001600560	-3.55	-10.43	19.42	2	2	PREDICTED: similar to histone [Nasonia vitripennis]	11.3 kDa
gi|156544964	XP_001607554	-2.83	-7.01	19.42	2	2	PREDICTED: similar to histone H4 [Nasonia vitripennis]	11.4 kDa
gi|156544925	XP_001603581	-3.55	-10.34	19.42	2	2	PREDICTED: similar to histone H4 [Nasonia vitripennis]	11.4 kDa
gi|156544974	XP_001607894	-4.06	-12.66	23.3	2	2	PREDICTED: similar to histone H4 [Nasonia vitripennis]	11.4 kDa
gi|156538963	XP_001599832	-4.06	-12.66	23.3	2	2	PREDICTED: similar to histone H4 [Nasonia vitripennis]	11.4 kDa
gi|156547355	XP_001602953	-158.64	-641.1	8.94	18	2	PREDICTED: similar to juvenile hormone epoxide hydrolase [Nasonia vitripennis]	53.7 kDa
gi|156551732	XP_001599607	-22.71	-83.89	7.66	4	2	PREDICTED: similar to LD46760p [Nasonia vitripennis]	52.3 kDa
gi|156538833	XP_001607988	-11.31	-44.56	17.47	3	2	PREDICTED: similar to lectin-related protein [Nasonia vitripennis]	18.4 kDa
gi|156542193	XP_001599856	-70.17	-212.47	3.36	15	2	PREDICTED: similar to major allergen Bla g 1.02 [Nasonia vitripennis]	159.5 kDa
gi|156546550	XP_001607558	-10.65	-41.79	12.3	2	2	PREDICTED: similar to MGC79752 protein [Nasonia vitripennis]	26.9 kDa
gi|156550388	XP_001599663	-24.93	-105.15	17.17	3	2	PREDICTED: similar to MPA3 allergen [Nasonia vitripennis]	24.9 kDa
gi|156555903	XP_001599313	-153.23	-638.51	20.95	22	2	PREDICTED: similar to myosin 2 light chain [Nasonia vitripennis]	16.5 kDa
gi|156546926	XP_001603243	-5.83	-19.69	14.83	2	2	PREDICTED: similar to phosphatidylethanolamine-binding protein isoform 1 [Nasonia vitripennis]	23.2 kDa
gi|156546930	XP_001603265	-5.83	-20.11	17.03	2	2	PREDICTED: similar to phosphatidylethanolamine-binding protein isoform 2 [Nasonia vitripennis]	20.4 kDa
gi|156546928	XP_001603288	-5.83	-20.11	17.03	2	2	PREDICTED: similar to phosphatidylethanolamine-binding protein isoform 3 [Nasonia vitripennis]	20.4 kDa
gi|156554183	XP_001599986	-23.6	-82.1	6.46	5	2	PREDICTED: similar to phosphoglucose isomerase [Nasonia vitripennis]	62.2 kDa
gi|156544011	XP_001607865	-67.41	-287.28	22.26	6	2	PREDICTED: similar to porin [Nasonia vitripennis]	30.2 kDa
gi|156545368	XP_001606222	-14.62	-54.04	3.27	2	2	PREDICTED: similar to protease m1 zinc metalloprotease [Nasonia vitripennis]	104.3 kDa
gi|156542504	XP_001600141	-64.81	-290.76	40.15	6	2	PREDICTED: similar to pupal cuticle protein 78E, putative, partial [Nasonia vitripennis]	14.5 kDa
gi|156548613	XP_001608082	-5.3	-16.9	8.83	2	2	PREDICTED: similar to putative 40S ribosomal protein SA [Nasonia vitripennis]	34.4 kDa
gi|156549937	XP_001602658	-19.71	-71.75	13.16	5	2	PREDICTED: similar to putative alcohol dehydrogenase [Nasonia vitripennis]	29.6 kDa
gi|156542281	XP_001601633	-31.84	-119.08	13.04	8	2	PREDICTED: similar to putative chemosensory protein 1 [Nasonia vitripennis]	16.1 kDa
gi|156546791	XP_001607354	-163.7	-666.84	15.38	25	2	PREDICTED: similar to putative ferritin 2 [Nasonia vitripennis]	25.0 kDa
gi|156555821	XP_001599834	-4.75	-16.22	20	2	2	PREDICTED: similar to putative salivary secreted peptide [Nasonia vitripennis]	13.8 kDa
gi|156546944	XP_001605124	-17.1	-70.28	24.29	3	2	PREDICTED: similar to ribosomal protein S12 [Nasonia vitripennis]	15.3 kDa
gi|156546898	XP_001599736	-92.19	-401.59	33.33	8	2	PREDICTED: similar to ribosomal protein S15 [Nasonia vitripennis]	16.9 kDa
gi|156553282	XP_001599651	-9.64	-35.7	16.12	2	2	PREDICTED: similar to ribosomal protein S3e [Nasonia vitripennis]	26.7 kDa
gi|156550309	XP_001603446	-9.53	-30.57	5.75	2	2	PREDICTED: similar to saposin [Nasonia vitripennis]	124.4 kDa
gi|156553897	XP_001601352	-16.94	-60.49	2.07	2	2	PREDICTED: similar to spectrin [Nasonia vitripennis]	278.5 kDa
gi|156554805	XP_001606158	-6.49	-20.1	8.24	2	2	PREDICTED: similar to teratocyte released chitinase [Nasonia vitripennis]	57.0 kDa
gi|156541090	XP_001600234	-51.26	-190.21	5.37	10	2	PREDICTED: similar to Tubulin, beta 2c isoform 1 [Nasonia vitripennis]	50.5 kDa
gi|156541092	XP_001600261	-51.26	-187.21	4.76	10	2	PREDICTED: similar to Tubulin, beta 2c isoform 2 [Nasonia vitripennis]	57.1 kDa
gi|156547558	XP_001602538	-17.52	-67.92	9.94	3	2	PREDICTED: similar to venom carbohydrate-rich protein [Nasonia vitripennis]	38.3 kDa
gi|156552730	XP_001599502	-62.66	-244.3	7.04	7	2	PREDICTED: similar to zinc metalloprotease [Nasonia vitripennis]	84.5 kDa
gi|156538629	XP_001607645	-37.17	-139.49	5.8	7	1	PREDICTED: hypothetical protein [Nasonia vitripennis]	47.4 kDa
gi|156540630	XP_001599581	-12.76	-33.21	2.14	4	1	PREDICTED: hypothetical protein [Nasonia vitripennis]	113.5 kDa
gi|156540964	XP_001601209	-14.69	-54.27	8.28	3	1	PREDICTED: hypothetical protein [Nasonia vitripennis]	38.6 kDa
gi|156554381	XP_001600064	-2.81	-7.4	7.24	2	1	PREDICTED: hypothetical protein [Nasonia vitripennis]	16.9 kDa
gi|156538723	XP_001607830	-1.21	3.52	0.35	1	1	PREDICTED: hypothetical protein [Nasonia vitripennis]	332.3 kDa
gi|156541066	XP_001599406	-1.34	1.05	2.53	1	1	PREDICTED: hypothetical protein [Nasonia vitripennis]	139.6 kDa
gi|156540039	XP_001600116	-1.34	0.95	2.69	1	1	PREDICTED: hypothetical protein [Nasonia vitripennis]	131.3 kDa
gi|156549344	XP_001601462	-1.47	-0.44	2.33	1	1	PREDICTED: hypothetical protein [Nasonia vitripennis]	93.6 kDa
gi|156551380	XP_001603195	-1.47	-1.91	1.35	1	1	PREDICTED: hypothetical protein [Nasonia vitripennis]	77.6 kDa
gi|156547988	XP_001605306	-1.16	-2.44	7.92	1	1	PREDICTED: hypothetical protein [Nasonia vitripennis]	11.3 kDa
gi|156542120	XP_001601691	-1.57	-2.61	4.52	1	1	PREDICTED: hypothetical protein [Nasonia vitripennis]	26.2 kDa
gi|156542118	XP_001601658	-1.57	-2.93	5.71	1	1	PREDICTED: hypothetical protein [Nasonia vitripennis]	20.9 kDa
gi|156539835	XP_001599290	-1.81	-2.99	6.15	1	1	PREDICTED: hypothetical protein [Nasonia vitripennis]	49.7 kDa
gi|156544913	XP_001599565	-1.34	-3.1	14.2	1	1	PREDICTED: hypothetical protein [Nasonia vitripennis]	18.4 kDa
gi|156541016	XP_001602837	-1.34	-3.16	18.94	1	1	PREDICTED: hypothetical protein [Nasonia vitripennis]	14.4 kDa
gi|156544600	XP_001603774	-1.39	-3.79	5.88	1	1	PREDICTED: hypothetical protein [Nasonia vitripennis]	15.1 kDa
gi|156542030	XP_001600728	-1.11	-3.94	12.79	1	1	PREDICTED: hypothetical protein [Nasonia vitripennis]	10.0 kDa
gi|156536939	XP_001608192	-1.82	-4.1	12.79	1	1	PREDICTED: hypothetical protein [Nasonia vitripennis]	20.4 kDa
gi|156542606	XP_001604235	-2.16	-5.63	7.77	1	1	PREDICTED: hypothetical protein [Nasonia vitripennis]	44.8 kDa
gi|156549078	XP_001607506	-2.58	-6.69	2.73	1	1	PREDICTED: hypothetical protein [Nasonia vitripennis]	58.3 kDa
gi|156539651	XP_001600348	-3.21	-7.67	1.12	1	1	PREDICTED: hypothetical protein [Nasonia vitripennis]	132.0 kDa
gi|156537446	XP_001607022	-6.13	-20.15	1.52	1	1	PREDICTED: hypothetical protein [Nasonia vitripennis]	262.2 kDa
gi|156552380	XP_001603866	-7.23	-31.16	6.94	1	1	PREDICTED: hypothetical protein [Nasonia vitripennis]	40.5 kDa
gi|156552153	XP_001605732	-11.11	-44.03	2.26	1	1	PREDICTED: hypothetical protein [Nasonia vitripennis]	145.0 kDa
gi|156547510	XP_001603936	-1	0.68	3.82	1	1	PREDICTED: similar to 26S proteasome regulatory complex ATPase RPT4 [Nasonia vitripennis]	44.6 kDa
gi|156537703	XP_001607926	-1.21	-1.5	10	1	1	PREDICTED: similar to 2-Keto-3-deoxy-(6-phospho-)gluconate aldolase, putative [Nasonia vitripennis]	34.2 kDa
gi|156547253	XP_001601340	-33.44	-127.35	8.52	6	1	PREDICTED: similar to 3-hydroxyacyl-coa dehyrogenase [Nasonia vitripennis]	35.7 kDa
gi|156543342	XP_001607606	-2.34	-6.49	5.38	1	1	PREDICTED: similar to acidic p0 ribosomal protein [Nasonia vitripennis]	34.0 kDa
gi|156537745	XP_001607990	-4.57	-14.35	3.27	1	1	PREDICTED: similar to aconitase, mitochondrial [Nasonia vitripennis]	100.0 kDa
gi|156544271	XP_001606978	-9.57	-13.76	4.91	6	1	PREDICTED: similar to actin [Nasonia vitripennis]	49.1 kDa
gi|156541938	XP_001601226	-13.96	-44.77	3.03	3	1	PREDICTED: similar to acyl-coa dehydrogenase [Nasonia vitripennis]	102.1 kDa
gi|156551115	XP_001603449	-3.49	-10.99	2.43	1	1	PREDICTED: similar to aldehyde dehydrogenase [Nasonia vitripennis]	53.2 kDa
gi|156547465	XP_001605336	-51.26	-212.54	4.82	5	1	PREDICTED: similar to alpha-tubulin [Nasonia vitripennis]	47.8 kDa
gi|156542271	XP_001600751	-31.99	-124.91	7.43	5	1	PREDICTED: similar to Annexin IX-A [Nasonia vitripennis]	35.8 kDa
gi|156549959	XP_001603273	-53.76	-222.38	4.68	5	1	PREDICTED: similar to Argininosuccinate synthetase 1 [Nasonia vitripennis]	48.1 kDa
gi|156548504	XP_001605831	-1.49	-1.79	4.56	1	1	PREDICTED: similar to aspartate aminotransferase [Nasonia vitripennis]	46.6 kDa
gi|156543199	XP_001606262	-49.17	-181.75	1.78	6	1	PREDICTED: similar to Ca/calmodulin-dependent protein kinase phosphatase-N [Nasonia vitripennis]	206.2 kDa
gi|156538002	XP_001608200	-8.43	-33.55	3.69	1	1	PREDICTED: similar to carboxylesterase [Nasonia vitripennis]	61.7 kDa
gi|156542422	XP_001601414	-7.69	-19.73	7.71	3	1	PREDICTED: similar to catalase [Nasonia vitripennis]	50.2 kDa
gi|156553409	XP_001599017	-9.94	-35.78	5.54	2	1	PREDICTED: similar to CG12262-PA [Nasonia vitripennis]	45.2 kDa
gi|156551495	XP_001605224	-2.06	-4.96	7.45	1	1	PREDICTED: similar to CG1750-PA [Nasonia vitripennis]	36.6 kDa
gi|156550241	XP_001602182	-10.31	-41.43	4.84	1	1	PREDICTED: similar to CG17838-PE [Nasonia vitripennis]	72.1 kDa
gi|156545150	XP_001602794	-15.05	-57.47	3.66	2	1	PREDICTED: similar to CG4170-PA [Nasonia vitripennis]	49.5 kDa
gi|156552057	XP_001604123	-3.35	-10.43	10.83	2	1	PREDICTED: similar to CG6000-PA [Nasonia vitripennis]	13.5 kDa
gi|156548017	XP_001605609	-3.3	-9.53	3.04	1	1	PREDICTED: similar to CG6382-PA [Nasonia vitripennis]	58.2 kDa
gi|156548948	XP_001607032	-44.99	-193.3	8.38	3	1	PREDICTED: similar to CG9149-PA [Nasonia vitripennis]	41.2 kDa
gi|156540229	XP_001601924	-29.15	-118.14	9.31	3	1	PREDICTED: similar to chaperonin [Nasonia vitripennis]	46.9 kDa
gi|156544986	XP_001607995	-8.87	-25.59	1.01	2	1	PREDICTED: similar to clathrin heavy chain [Nasonia vitripennis]	192.2 kDa
gi|156544189	XP_001606559	-25.56	-105.66	13.2	4	1	PREDICTED: similar to conserved hypothetical protein [Nasonia vitripennis]	22.6 kDa
gi|156555145	XP_001602732	-2.36	-0.53	7.18	2	1	PREDICTED: similar to conserved hypothetical protein [Nasonia vitripennis]	45.6 kDa
gi|156544658	XP_001605050	-3.6	-4.72	3.59	2	1	PREDICTED: similar to conserved hypothetical protein [Nasonia vitripennis]	70.6 kDa
gi|156543427	XP_001600788	-4.61	-10.05	2.4	2	1	PREDICTED: similar to conserved hypothetical protein [Nasonia vitripennis]	58.5 kDa
gi|156542715	XP_001603059	-1	0.96	3.58	1	1	PREDICTED: similar to conserved hypothetical protein [Nasonia vitripennis]	63.9 kDa
gi|156551555	XP_001601024	-2.01	-3.28	3.29	1	1	PREDICTED: similar to conserved hypothetical protein [Nasonia vitripennis]	71.7 kDa
gi|156550739	XP_001606092	-2.16	-5.83	11.96	1	1	PREDICTED: similar to conserved hypothetical protein [Nasonia vitripennis]	24.3 kDa
gi|156554809	XP_001606183	-5.02	-14.89	4.84	2	1	PREDICTED: similar to CRALBP [Nasonia vitripennis]	29.3 kDa
gi|156552848	XP_001600075	-2.44	-6	3.61	1	1	PREDICTED: similar to cystathionine beta-synthase [Nasonia vitripennis]	54.9 kDa
gi|156547261	XP_001601960	-17.63	-72.19	5.15	2	1	PREDICTED: similar to cystathionine gamma-lyase [Nasonia vitripennis]	42.7 kDa
gi|156553773	XP_001601805	-3.47	-10.4	2.63	1	1	PREDICTED: similar to cytochrome P450 [Nasonia vitripennis]	61.4 kDa
gi|156553602	XP_001599777	-8.47	-33.8	4.61	1	1	PREDICTED: similar to cytochrome P450 [Nasonia vitripennis]	56.8 kDa
gi|156553634	XP_001600283	-1.05	0.71	5.59	1	1	PREDICTED: similar to cytochrome P450 monooxygenase [Nasonia vitripennis]	57.3 kDa
gi|156549469	XP_001606417	-1.14	0.5	3.57	1	1	PREDICTED: similar to cytochrome P450 monooxygenase [Nasonia vitripennis]	63.5 kDa
gi|156551890	XP_001605875	-48.99	-208.49	15.96	7	1	PREDICTED: similar to diazepam binding inhibitor, putative [Nasonia vitripennis]	11.0 kDa
gi|156541618	XP_001600525	-3.85	-6.89	3.98	2	1	PREDICTED: similar to elongation factor 1 delta [Nasonia vitripennis]	47.2 kDa
gi|156553052	XP_001605216	-11.44	-4.44	1.95	7	1	PREDICTED: similar to ENSANGP00000003008 [Nasonia vitripennis]	96.3 kDa
gi|156546108	XP_001601807	-36.51	-154.88	6.01	3	1	PREDICTED: similar to ENSANGP00000003967 [Nasonia vitripennis]	36.5 kDa
gi|156551988	XP_001602878	-6.75	-25.38	5.38	1	1	PREDICTED: similar to ENSANGP00000004677 [Nasonia vitripennis]	58.4 kDa
gi|156548795	XP_001605557	-4.38	-14.25	2.68	1	1	PREDICTED: similar to ENSANGP00000010003 [Nasonia vitripennis]	73.4 kDa
gi|156552615	XP_001599137	-2.1	-5.53	4.53	1	1	PREDICTED: similar to ENSANGP00000010163 [Nasonia vitripennis]	34.7 kDa
gi|156554459	XP_001601449	-10.28	-42.49	8.87	1	1	PREDICTED: similar to ENSANGP00000011707 [Nasonia vitripennis]	45.9 kDa
gi|156540213	XP_001601921	-5.8	-22.14	7.79	1	1	PREDICTED: similar to ENSANGP00000011972 [Nasonia vitripennis]	35.0 kDa
gi|156551491	XP_001605187	-39.97	-150.36	1.95	6	1	PREDICTED: similar to ENSANGP00000011975 [Nasonia vitripennis]	75.1 kDa
gi|156553657	XP_001600604	-103.08	-427.11	11.33	11	1	PREDICTED: similar to ENSANGP00000012072 [Nasonia vitripennis]	29.2 kDa
gi|156542899	XP_001601265	-3.02	-11.14	17.35	1	1	PREDICTED: similar to ENSANGP00000012664 [Nasonia vitripennis]	11.0 kDa
gi|156537079	XP_001602290	-2.21	-2.83	1.78	1	1	PREDICTED: similar to ENSANGP00000012855 [Nasonia vitripennis]	178.4 kDa
gi|156546090	XP_001601271	-36.27	-136.92	6.7	6	1	PREDICTED: similar to ENSANGP00000013071 [Nasonia vitripennis]	47.1 kDa
gi|156547443	XP_001605073	-16.77	-72.89	8.47	1	1	PREDICTED: similar to ENSANGP00000014133 [Nasonia vitripennis]	42.3 kDa
gi|156541018	XP_001602925	-38.57	-161.72	7.19	4	1	PREDICTED: similar to ENSANGP00000014264 [Nasonia vitripennis]	34.9 kDa
gi|156549004	XP_001607306	-7.72	-31.17	9.17	1	1	PREDICTED: similar to ENSANGP00000014281 [Nasonia vitripennis]	40.4 kDa
gi|156543547	XP_001603204	-3.52	-6.86	2.77	2	1	PREDICTED: similar to ENSANGP00000015958 [Nasonia vitripennis]	103.8 kDa
gi|156551541	XP_001600683	-4.48	-5.67	4.01	3	1	PREDICTED: similar to ENSANGP00000018269 [Nasonia vitripennis]	61.1 kDa
gi|156548278	XP_001605148	-29.99	-127.67	11.06	3	1	PREDICTED: similar to ENSANGP00000018891 [Nasonia vitripennis]	24.1 kDa
gi|156538437	XP_001606217	-351.2	-1583.38	2.49	5	1	PREDICTED: similar to ENSANGP00000020237 [Nasonia vitripennis]	103.8 kDa
gi|156537311	XP_001606142	-8.64	-34.34	5.6	1	1	PREDICTED: similar to ENSANGP00000020432 [Nasonia vitripennis]	58.0 kDa
gi|156541538	XP_001600345	-5.08	-16.49	14.06	2	1	PREDICTED: similar to ENSANGP00000020660 [Nasonia vitripennis]	21.6 kDa
gi|156551900	XP_001606799	-5.08	-19	3.2	1	1	PREDICTED: similar to ENSANGP00000020847 [Nasonia vitripennis]	49.9 kDa
gi|156546336	XP_001606541	-1.15	2.69	1.41	1	1	PREDICTED: similar to ENSANGP00000020925 [Nasonia vitripennis]	234.7 kDa
gi|156537506	XP_001607401	-15.39	-57.98	3.2	2	1	PREDICTED: similar to ENSANGP00000021292 [Nasonia vitripennis]	97.6 kDa
gi|156540435	XP_001599720	-11.47	-16.79	1.63	5	1	PREDICTED: similar to ENSANGP00000022132 [Nasonia vitripennis]	125.8 kDa
gi|156539732	XP_001601693	-11.47	-38.47	12.33	5	1	PREDICTED: similar to ENSANGP00000022132 [Nasonia vitripennis]	16.5 kDa
gi|156540754	XP_001602485	-11.47	-39.21	15.38	5	1	PREDICTED: similar to ENSANGP00000022132 [Nasonia vitripennis]	13.6 kDa
gi|156538068	XP_001607498	-17.31	-67.81	9.93	3	1	PREDICTED: similar to ENSANGP00000022464 [Nasonia vitripennis]	29.8 kDa
gi|156548829	XP_001605497	-1.64	-1.16	2.04	1	1	PREDICTED: similar to ENSANGP00000022801 [Nasonia vitripennis]	92.6 kDa
gi|156544007	XP_001607853	-12.4	-52.72	13.71	2	1	PREDICTED: similar to ENSANGP00000023128 [Nasonia vitripennis]	19.6 kDa
gi|156541490	XP_001600488	-1.02	0.22	4.94	1	1	PREDICTED: similar to ENSANGP00000024127 [Nasonia vitripennis]	39.5 kDa
gi|156543521	XP_001602581	-1.16	-0.11	3.75	1	1	PREDICTED: similar to ENSANGP00000028549 [Nasonia vitripennis]	54.9 kDa
gi|156550446	XP_001600840	-3.21	-9.2	4.09	1	1	PREDICTED: similar to ENSANGP00000029545 [Nasonia vitripennis]	65.5 kDa
gi|156543842	XP_001606743	-8.82	-28.45	4.55	2	1	PREDICTED: similar to ENSANGP00000031374 [Nasonia vitripennis]	83.5 kDa
gi|156538961	XP_001599641	-1.1	-2.1	7.2	1	1	PREDICTED: similar to ENSANGP00000031916 [Nasonia vitripennis]	13.4 kDa
gi|156545261	XP_001604914	-1.37	0.3	1.53	1	1	PREDICTED: similar to esophageal cancer associated protein [Nasonia vitripennis]	111.7 kDa
gi|156552677	XP_001599303	-128.12	-545.82	6.11	12	1	PREDICTED: similar to eukaryotic translation initiation factor 3 subunit 5 epsilon-like protein [Nasonia vitripennis]	32.6 kDa
gi|156544923	XP_001602916	-20.63	-86.83	11.93	3	1	PREDICTED: similar to extracellular Cu/Zn superoxide dismutase [Nasonia vitripennis]	18.2 kDa
gi|156554581	XP_001602523	-7.04	-23.9	6.78	2	1	PREDICTED: similar to fibroinase [Nasonia vitripennis]	37.9 kDa
gi|156546584	XP_001601902	-14.82	-50.95	4.8	4	1	PREDICTED: similar to fumarylacetoacetate hydrolase [Nasonia vitripennis]	46.3 kDa
gi|156552189	XP_001606057	-1.24	-0.47	4.49	1	1	PREDICTED: similar to GA13915-PA [Nasonia vitripennis]	66.9 kDa
gi|156543260	XP_001606741	-12.57	-55.52	30.21	2	1	PREDICTED: similar to GA14337-PA [Nasonia vitripennis]	10.6 kDa
gi|156546088	XP_001601249	-19.55	-76.93	6.45	3	1	PREDICTED: similar to GA14484-PA [Nasonia vitripennis]	37.9 kDa
gi|156552637	XP_001603160	-13.48	-51.16	2.38	2	1	PREDICTED: similar to GA16177-PA [Nasonia vitripennis]	71.7 kDa
gi|156544812	XP_001606616	-11.88	-47.66	6.69	2	1	PREDICTED: similar to GA18288-PA [Nasonia vitripennis]	25.9 kDa
gi|156553799	XP_001601889	-1.96	-3.95	4.38	1	1	PREDICTED: similar to GA21085-PA [Nasonia vitripennis]	43.9 kDa
gi|156554542	XP_001605063	-19.02	-73.36	10.3	3	1	PREDICTED: similar to GA21314-PA [Nasonia vitripennis]	32.2 kDa
gi|156538224	XP_001602519	-3.58	-13.03	5.5	1	1	PREDICTED: similar to GA22042-PA [Nasonia vitripennis]	23.7 kDa
gi|156548988	XP_001607237	-4.3	-14.86	2.72	1	1	PREDICTED: similar to GH08974p [Nasonia vitripennis]	49.6 kDa
gi|156540453	XP_001599385	-7.12	-29.14	10.82	1	1	PREDICTED: similar to glucosamine-6-phosphate N-acetyltransferase [Nasonia vitripennis]	21.7 kDa
gi|156549030	XP_001607373	-11.17	-46.28	3.34	1	1	PREDICTED: similar to glycerol-3-phosphate dehydrogenase [Nasonia vitripennis]	46.2 kDa
gi|156551167	XP_001604410	-6.68	-17.69	2.4	2	1	PREDICTED: similar to glycosyltransferase [Nasonia vitripennis]	109.4 kDa
gi|156547043	XP_001601273	-3.76	-11.5	3.08	1	1	PREDICTED: similar to GM01289p [Nasonia vitripennis]	65.6 kDa
gi|156546520	XP_001605758	-2.04	-3.82	3.14	1	1	PREDICTED: similar to GM12270p [Nasonia vitripennis]	59.1 kDa
gi|156551429	XP_001604269	-1.9	-2.85	2.68	1	1	PREDICTED: similar to gmp synthase [Nasonia vitripennis]	78.7 kDa
gi|156545814	XP_001607760	-12.08	-45.27	3.78	2	1	PREDICTED: similar to GTP binding protein [Nasonia vitripennis]	44.7 kDa
gi|156542353	XP_001600299	-5.54	-20.9	7.77	1	1	PREDICTED: similar to H+ transporting ATP synthase gamma subunit [Nasonia vitripennis]	32.6 kDa
gi|156547956	XP_001604939	-1.1	-2.1	6.82	1	1	PREDICTED: similar to H2A histone [Nasonia vitripennis]	14.5 kDa
gi|156547889	XP_001608044	-7.87	-24.49	2.48	2	1	PREDICTED: similar to heat shock cognate 70 protein [Nasonia vitripennis]	70.6 kDa
gi|156553185	XP_001600020	-14.21	-59.4	14.79	2	1	PREDICTED: similar to heat shock protein 1 [Nasonia vitripennis]	19.2 kDa
gi|156542837	XP_001599773	-7.87	-23.55	2.13	2	1	PREDICTED: similar to heat shock protein 70 [Nasonia vitripennis]	82.8 kDa
gi|156543973	XP_001604951	-7.87	-24.26	2.5	2	1	PREDICTED: similar to heat shock protein Hsp70 [Nasonia vitripennis]	70.9 kDa
gi|156548706	XP_001603011	-1.63	-3.1	3.55	1	1	PREDICTED: similar to heterogeneous nuclear ribonucleoprotein [Nasonia vitripennis]	34.6 kDa
gi|156546764	XP_001605464	-15.55	-58.16	4.72	3	1	PREDICTED: similar to Heterogeneous nuclear ribonucleoprotein K [Nasonia vitripennis]	42.9 kDa
gi|156537036	XP_001601257	-7.47	-14.71	2.25	4	1	PREDICTED: similar to high-affinity Na+-dependent glutamate transporter [Nasonia vitripennis]	58.4 kDa
gi|156553474	XP_001600043	-59.11	-219.43	5	10	1	PREDICTED: similar to histone H2B [Nasonia vitripennis]	31.7 kDa
gi|156538971	XP_001599909	-59.11	-240.42	12.1	10	1	PREDICTED: similar to histone H2B [Nasonia vitripennis]	13.7 kDa
gi|156537898	XP_001608287	-59.11	-240.42	12.1	10	1	PREDICTED: similar to histone H2B [Nasonia vitripennis]	13.7 kDa
gi|156545382	XP_001607906	-59.11	-240.42	12.1	10	1	PREDICTED: similar to histone H2B [Nasonia vitripennis]	13.7 kDa
gi|156545384	XP_001607918	-59.11	-240.42	12.1	10	1	PREDICTED: similar to histone H2B [Nasonia vitripennis]	13.7 kDa
gi|156545386	XP_001607945	-59.11	-240.42	12.1	10	1	PREDICTED: similar to histone H2B [Nasonia vitripennis]	13.7 kDa
gi|156545108	XP_001603608	-59.11	-240.42	12.1	10	1	PREDICTED: similar to histone H2B [Nasonia vitripennis]	13.7 kDa
gi|156548974	XP_001607725	-59.11	-240.42	12.1	10	1	PREDICTED: similar to histone H2B [Nasonia vitripennis]	13.7 kDa
gi|156549202	XP_001608234	-59.11	-240.42	12.1	10	1	PREDICTED: similar to histone H2B [Nasonia vitripennis]	13.7 kDa
gi|156548874	XP_001607191	-59.11	-240.42	12.1	10	1	PREDICTED: similar to histone H2B [Nasonia vitripennis]	13.7 kDa
gi|156545307	XP_001607523	-59.11	-240.42	12.1	10	1	PREDICTED: similar to histone H2B [Nasonia vitripennis]	13.7 kDa
gi|156537632	XP_001608226	-59.11	-240.42	12.1	10	1	PREDICTED: similar to histone H2B [Nasonia vitripennis]	13.7 kDa
gi|156548904	XP_001606665	-59.11	-245.51	14.56	10	1	PREDICTED: similar to histone H2B [Nasonia vitripennis]	11.7 kDa
gi|156538969	XP_001602196	-59.11	-224.8	6.47	10	1	PREDICTED: similar to histone H2B, partial [Nasonia vitripennis]	24.9 kDa
gi|156540197	XP_001599416	-2.63	-8.22	19.75	1	1	PREDICTED: similar to histone protein Hist2h3c1 [Nasonia vitripennis]	18.5 kDa
gi|156544976	XP_001607935	-2.63	-8.5	23.53	1	1	PREDICTED: similar to histone protein Hist2h3c1 [Nasonia vitripennis]	15.4 kDa
gi|156536991	XP_001608284	-2.63	-8.5	23.53	1	1	PREDICTED: similar to histone protein Hist2h3c1 [Nasonia vitripennis]	15.4 kDa
gi|156544927	XP_001603659	-2.63	-8.5	23.53	1	1	PREDICTED: similar to histone protein Hist2h3c1 [Nasonia vitripennis]	15.4 kDa
gi|156538959	XP_001599673	-2.63	-8.5	23.53	1	1	PREDICTED: similar to histone protein Hist2h3c1 [Nasonia vitripennis]	15.4 kDa
gi|156548576	XP_001607330	-2.63	-8.5	23.53	1	1	PREDICTED: similar to histone protein Hist2h3c1 [Nasonia vitripennis]	15.4 kDa
gi|156544954	XP_001607608	-2.63	-8.5	23.53	1	1	PREDICTED: similar to histone protein Hist2h3c1 [Nasonia vitripennis]	15.4 kDa
gi|156544958	XP_001607613	-2.63	-8.5	23.53	1	1	PREDICTED: similar to histone protein Hist2h3c1 [Nasonia vitripennis]	15.4 kDa
gi|156544956	XP_001607616	-2.63	-8.5	23.53	1	1	PREDICTED: similar to histone protein Hist2h3c1 [Nasonia vitripennis]	15.4 kDa
gi|156548634	XP_001608235	-2.63	-8.5	23.53	1	1	PREDICTED: similar to histone protein Hist2h3c1 [Nasonia vitripennis]	15.4 kDa
gi|156548638	XP_001608238	-2.63	-8.5	23.53	1	1	PREDICTED: similar to histone protein Hist2h3c1 [Nasonia vitripennis]	15.4 kDa
gi|156553440	XP_001599561	-2.63	-8.5	23.53	1	1	PREDICTED: similar to histone protein Hist2h3c1 [Nasonia vitripennis]	15.4 kDa
gi|156553442	XP_001599419	-2.63	-8.5	23.53	1	1	PREDICTED: similar to histone protein Hist2h3c1 [Nasonia vitripennis]	15.4 kDa
gi|156539583	XP_001599163	-2.63	-8.5	23.53	1	1	PREDICTED: similar to histone protein Hist2h3c1 isoform 1 [Nasonia vitripennis]	15.4 kDa
gi|156539585	XP_001599179	-2.63	-8.53	23.7	1	1	PREDICTED: similar to histone protein Hist2h3c1 isoform 2 [Nasonia vitripennis]	15.2 kDa
gi|156541431	XP_001599381	-1.91	-2.22	2.65	1	1	PREDICTED: similar to importin beta-1 [Nasonia vitripennis]	130.0 kDa
gi|156549853	XP_001606880	-1.16	-0.41	3.22	1	1	PREDICTED: similar to IP11896p [Nasonia vitripennis]	51.4 kDa
gi|156543824	XP_001608101	-1.93	-3.58	4.89	1	1	PREDICTED: similar to isocitrate dehydrogenase [Nasonia vitripennis]	46.1 kDa
gi|156545790	XP_001605757	-10.81	-45.67	8.09	1	1	PREDICTED: similar to LD02616p [Nasonia vitripennis]	31.0 kDa
gi|156543493	XP_001601953	-4.75	-15.4	1.9	1	1	PREDICTED: similar to LD24485p [Nasonia vitripennis]	97.3 kDa
gi|156545611	XP_001604870	-5.9	-23.83	7.33	1	1	PREDICTED: similar to lectin 4 C-type lectin [Nasonia vitripennis]	26.5 kDa
gi|156545125	XP_001602281	-2.93	-3.31	6.94	2	1	PREDICTED: similar to leucine rich repeat protein [Nasonia vitripennis]	45.1 kDa
gi|156538825	XP_001607975	-13.46	-50.59	5.02	2	1	PREDICTED: similar to Leukotriene A4 hydrolase [Nasonia vitripennis]	70.4 kDa
gi|156541600	XP_001600671	-3.35	-10.55	2.74	1	1	PREDICTED: similar to low-density lipoprotein receptor (ldl) [Nasonia vitripennis]	49.0 kDa
gi|156541598	XP_001599595	-3.35	-10.91	3.64	1	1	PREDICTED: similar to low-density lipoprotein receptor (ldl) [Nasonia vitripennis]	37.1 kDa
gi|156537187	XP_001604542	-1.17	-3.66	2.54	1	1	PREDICTED: similar to LP21747p [Nasonia vitripennis]	28.8 kDa
gi|156538755	XP_001607880	-1.49	-1.55	5.91	1	1	PREDICTED: similar to M protein type, putative [Nasonia vitripennis]	49.8 kDa
gi|156548174	XP_001606921	-2.37	-7.15	10.49	1	1	PREDICTED: similar to mapmodulin-like protein [Nasonia vitripennis]	30.6 kDa
gi|156550614	XP_001604362	-20.26	-84.36	4.66	2	1	PREDICTED: similar to metalloprotease [Nasonia vitripennis]	43.0 kDa
gi|156541114	XP_001601400	-2.43	-4.89	3.29	1	1	PREDICTED: similar to Methylcrotonoyl-Coenzyme A carboxylase 1 (alpha) [Nasonia vitripennis]	77.4 kDa
gi|156554110	XP_001599068	-11.24	-41.79	4.98	2	1	PREDICTED: similar to microsomal dipeptidase [Nasonia vitripennis]	47.2 kDa
gi|156538713	XP_001607816	-3.1	-10.26	6.3	1	1	PREDICTED: similar to mitochondrial ATP synthase b chain [Nasonia vitripennis]	27.4 kDa
gi|156541558	XP_001599813	-1.98	-5.14	11.79	1	1	PREDICTED: similar to mitochondrial ribosomal protein L11 [Nasonia vitripennis]	21.7 kDa
gi|156553423	XP_001599498	-2.16	-1.33	0.76	1	1	PREDICTED: similar to mutated in ataxia telangiectasia [Nasonia vitripennis]	285.7 kDa
gi|156552278	XP_001600652	-2.98	-1.8	1.62	2	1	PREDICTED: similar to Na/Ca exchange protein isoform 1 [Nasonia vitripennis]	95.7 kDa
gi|156552276	XP_001600904	-2.98	-1.8	1.62	2	1	PREDICTED: similar to Na/Ca exchange protein isoform 2 [Nasonia vitripennis]	95.6 kDa
gi|156541060	XP_001602981	-3.06	-8.37	4.19	1	1	PREDICTED: similar to NADH-ubiquinone oxidoreductase [Nasonia vitripennis]	71.7 kDa
gi|156554076	XP_001600035	-2.47	0.86	2.5	2	1	PREDICTED: similar to neutral endopeptidase 24.11 [Nasonia vitripennis]	87.1 kDa
gi|156543308	XP_001604619	-3.58	-9.88	2.36	1	1	PREDICTED: similar to nuclear export factor CRM1 [Nasonia vitripennis]	122.3 kDa
gi|156547972	XP_001605127	-1.67	-1.07	1.69	1	1	PREDICTED: similar to nuclear pore complex protein nup154 [Nasonia vitripennis]	145.5 kDa
gi|156555652	XP_001603746	-8.35	-32.91	4.81	1	1	PREDICTED: similar to nucleolar KKE/D repeat protein; DmNOP56 [Nasonia vitripennis]	57.9 kDa
gi|156552665	XP_001599764	-4.7	-19.34	9.93	1	1	PREDICTED: similar to nucleoplasmin-like protein [Nasonia vitripennis]	15.6 kDa
gi|156543830	XP_001606635	-1.21	-0.17	5.78	1	1	PREDICTED: similar to NudC domain containing 1 [Nasonia vitripennis]	63.0 kDa
gi|156540926	XP_001603319	-1.22	-3.56	21.43	1	1	PREDICTED: similar to odorant-binding protein 3 [Nasonia vitripennis]	13.8 kDa
gi|156554415	XP_001603570	-19.47	-73.71	4.09	3	1	PREDICTED: similar to ornithine aminotransferase [Nasonia vitripennis]	51.7 kDa
gi|156549724	XP_001605685	-24.24	-84.94	0.65	3	1	PREDICTED: similar to p270 [Nasonia vitripennis]	339.8 kDa
gi|156555805	XP_001602443	-19.63	-72.84	6.57	5	1	PREDICTED: similar to peptidoglycan recognition protein-LC [Nasonia vitripennis]	22.1 kDa
gi|156543362	XP_001608132	-8.4	-34.85	12.08	1	1	PREDICTED: similar to phospholipid-hydroperoxide glutathione peroxidase [Nasonia vitripennis]	23.4 kDa
gi|156554540	XP_001605473	-2.56	-7.77	9.54	1	1	PREDICTED: similar to phosphomannomutase [Nasonia vitripennis]	30.2 kDa
gi|156551650	XP_001600620	-18.15	-74.25	8.2	2	1	PREDICTED: similar to Phosphoserine aminotransferase 1 [Nasonia vitripennis]	40.5 kDa
gi|156542799	XP_001607402	-5.57	-23.15	19.84	1	1	PREDICTED: similar to profilin [Nasonia vitripennis]	13.7 kDa
gi|156538018	XP_001608208	-2.91	-4.73	0.86	1	1	PREDICTED: similar to protease m1 zinc metalloprotease [Nasonia vitripennis]	304.2 kDa
gi|156547425	XP_001605493	-2.22	-6.47	9.75	1	1	PREDICTED: similar to proteasome beta subunit [Nasonia vitripennis]	26.4 kDa
gi|156554116	XP_001602967	-32.85	-131.06	6.64	4	1	PREDICTED: similar to protein disulfide isomerase [Nasonia vitripennis]	47.9 kDa
gi|156542502	XP_001600091	-117.87	-517.01	17.76	13	1	PREDICTED: similar to pupal cuticle protein 78E, putative [Nasonia vitripennis]	16.5 kDa
gi|156547118	XP_001602867	-6.59	-27.77	21.51	2	1	PREDICTED: similar to pupal cuticle protein 78E, putative, partial [Nasonia vitripennis]	10.3 kDa
gi|156545016	XP_001600046	-2.16	-5.41	4.51	1	1	PREDICTED: similar to putative 14-3-3 protein [Nasonia vitripennis]	27.8 kDa
gi|156549973	XP_001603697	-377.61	-1706.07	12.19	8	1	PREDICTED: similar to putative alcohol dehydrogenase [Nasonia vitripennis]	31.2 kDa
gi|156536899	XP_001607323	-15.39	-63.49	11.83	2	1	PREDICTED: similar to putative beta-NAC-like protein [Nasonia vitripennis]	20.1 kDa
gi|156546622	XP_001602766	-3.88	-14.27	7.22	1	1	PREDICTED: similar to putative chymotrypsin-like protein [Nasonia vitripennis]	31.0 kDa
gi|156542891	XP_001600983	-1.43	-0.4	4.01	1	1	PREDICTED: similar to putative glyoxylate reductase/hydroxypyruvate reductase [Nasonia vitripennis]	76.9 kDa
gi|156551940	XP_001607748	-68.78	-284.17	13.59	9	1	PREDICTED: similar to putative muscular protein 20 [Nasonia vitripennis]	20.4 kDa
gi|156538923	XP_001599128	-1	-0.97	6.59	1	1	PREDICTED: similar to putative muscular protein 20 [Nasonia vitripennis]	20.5 kDa
gi|156540081	XP_001600011	-2.13	-6.71	8.44	1	1	PREDICTED: similar to putative prohibitin [Nasonia vitripennis]	17.0 kDa
gi|156551916	XP_001607057	-17.77	-66.62	13.49	4	1	PREDICTED: similar to putative rab11 [Nasonia vitripennis]	24.4 kDa
gi|156539915	XP_001600666	-1.07	2.59	2.49	1	1	PREDICTED: similar to putative retroelement pol polyprotein [Nasonia vitripennis]	135.8 kDa
gi|156544948	XP_001607509	-59.11	-227.83	5.42	10	1	PREDICTED: similar to putative Rho1 [Nasonia vitripennis]	31.2 kDa
gi|156542791	XP_001607024	-1.02	-0.24	3.98	1	1	PREDICTED: similar to putative zinc-dependent alcohol dehydrogenase [Nasonia vitripennis]	41.2 kDa
gi|156548765	XP_001604584	-9.46	-34.71	8.56	2	1	PREDICTED: similar to pyruvate dehydrogenase [Nasonia vitripennis]	39.3 kDa
gi|156547409	XP_001604380	-1.42	1.21	0.92	1	1	PREDICTED: similar to rCG30240 [Nasonia vitripennis]	168.8 kDa
gi|156551229	XP_001604366	-13.7	-58.96	6.35	1	1	PREDICTED: similar to RE22593p [Nasonia vitripennis]	34.1 kDa
gi|156537189	XP_001605434	-1.17	-3.14	4.3	1	1	PREDICTED: similar to RE71854p [Nasonia vitripennis]	20.0 kDa
gi|156548258	XP_001600152	-7.85	-27.7	5.36	2	1	PREDICTED: similar to receptor for activated protein kinase C-like [Nasonia vitripennis]	35.8 kDa
gi|156550041	XP_001605078	-2.09	-4.72	3.63	1	1	PREDICTED: similar to replication factor C [Nasonia vitripennis]	39.9 kDa
gi|156539989	XP_001599862	-2.26	-0.35	5.66	2	1	PREDICTED: similar to reverse transcriptase-like protein [Nasonia vitripennis]	51.9 kDa
gi|156543666	XP_001605158	-4.01	-11.92	2.89	1	1	PREDICTED: similar to RH08748p [Nasonia vitripennis]	121.9 kDa
gi|156549728	XP_001605786	-1.41	1.56	1.81	1	1	PREDICTED: similar to rho/rac-interacting citron kinase [Nasonia vitripennis]	176.5 kDa
gi|156545547	XP_001605069	-1.92	-5.6	7.86	1	1	PREDICTED: similar to ribosomal protein L23 [Nasonia vitripennis]	14.8 kDa
gi|156547850	XP_001604487	-4.2	-14.63	6.07	1	1	PREDICTED: similar to ribosomal protein L23Ae [Nasonia vitripennis]	26.7 kDa
gi|156553789	XP_001599509	-1.25	-1.96	6.72	1	1	PREDICTED: similar to ribosomal protein L27 [Nasonia vitripennis]	15.9 kDa
gi|156544034	XP_001600115	-1.08	0.7	5.01	1	1	PREDICTED: similar to ribosomal protein L3 [Nasonia vitripennis]	47.5 kDa
gi|156551942	XP_001607790	-3.52	-9.11	11.29	2	1	PREDICTED: similar to ribosomal protein L31e [Nasonia vitripennis]	14.4 kDa
gi|156548298	XP_001606808	-1.2	-1.86	7.76	1	1	PREDICTED: similar to ribosomal protein L36 [Nasonia vitripennis]	13.5 kDa
gi|156553504	XP_001600790	-8.69	-28.87	12.14	3	1	PREDICTED: similar to ribosomal protein S13e [Nasonia vitripennis]	15.8 kDa
gi|156544938	XP_001607263	-22.39	-96.93	10.77	2	1	PREDICTED: similar to ribosomal protein S15A [Nasonia vitripennis]	14.7 kDa
gi|156550181	XP_001604681	-6.98	-27.44	6.12	1	1	PREDICTED: similar to ribosomal protein S2 [Nasonia vitripennis]	30.0 kDa
gi|156546942	XP_001604670	-21.01	-85.75	21.69	5	1	PREDICTED: similar to ribosomal protein S21 [Nasonia vitripennis]	9.2 kDa
gi|156542863	XP_001599933	-9.14	-37.32	4.58	1	1	PREDICTED: similar to ribosomal protein S4e [Nasonia vitripennis]	29.6 kDa
gi|156547512	XP_001604111	-3.47	-11.57	5.77	1	1	PREDICTED: similar to ribosomal protein S8 [Nasonia vitripennis]	23.9 kDa
gi|156542797	XP_001607363	-30.71	-133.18	7.64	2	1	PREDICTED: similar to Rieske iron-sulfur protein 1 [Nasonia vitripennis]	29.9 kDa
gi|156554296	XP_001602465	-13.61	-52.69	9.93	3	1	PREDICTED: similar to S14e ribosomal protein [Nasonia vitripennis]	16.2 kDa
gi|156552609	XP_001599093	-24.31	-99.06	16.79	4	1	PREDICTED: similar to S17e ribosomal protein [Nasonia vitripennis]	15.3 kDa
gi|156553020	XP_001604672	-2.26	-6.17	4.74	1	1	PREDICTED: similar to serine-type enodpeptidase, putative [Nasonia vitripennis]	30.4 kDa
gi|156552806	XP_001599572	-1.07	0.68	4.66	1	1	PREDICTED: similar to seryl-tRNA synthetase [Nasonia vitripennis]	56.5 kDa
gi|156546038	XP_001600199	-3.68	-8.89	6.8	2	1	PREDICTED: similar to short-chain dehydrogenase [Nasonia vitripennis]	33.6 kDa
gi|156554371	XP_001604098	-4.1	-3.72	2.84	3	1	PREDICTED: similar to SHQ1 homolog (S. cerevisiae) [Nasonia vitripennis]	60.1 kDa
gi|156550476	XP_001602398	-1.28	-2.76	5.73	1	1	PREDICTED: similar to signal sequence receptor beta subunit [Nasonia vitripennis]	21.6 kDa
gi|156548412	XP_001604516	-1.17	-1.93	9.18	1	1	PREDICTED: similar to small heat shock protein [Nasonia vitripennis]	23.7 kDa
gi|156537145	XP_001603591	-16.31	-64.16	3.09	2	1	PREDICTED: similar to Sorting and assembly machinery component 50 homolog (S. cerevisiae) [Nasonia vitripennis]	61.0 kDa
gi|156546835	XP_001606332	-10.57	-43.66	4.69	1	1	PREDICTED: similar to sulfotransferase (sult) [Nasonia vitripennis]	39.8 kDa
gi|156554807	XP_001606170	-1.07	0.18	2.86	1	1	PREDICTED: similar to teratocyte released chitinase [Nasonia vitripennis]	54.0 kDa
gi|156548334	XP_001603220	-14.74	-52.73	4.27	3	1	PREDICTED: similar to thioredoxin reductase [Nasonia vitripennis]	58.9 kDa
gi|156547106	XP_001602650	-5.69	-23.88	24.51	1	1	PREDICTED: similar to thioredoxin-like protein, partial [Nasonia vitripennis]	11.5 kDa
gi|156551013	XP_001604990	-1.33	-0.02	3.92	1	1	PREDICTED: similar to timeless homolog (Drosophila) [Nasonia vitripennis]	76.7 kDa
gi|156552169	XP_001605876	-8.4	-16.38	2.8	4	1	PREDICTED: similar to transcriptional adaptor 3 [Nasonia vitripennis]	52.2 kDa
gi|156546016	XP_001607974	-21.67	-81.46	7.5	6	1	PREDICTED: similar to translation initiation factor 5a isoform 1 [Nasonia vitripennis]	17.7 kDa
gi|156546014	XP_001607976	-21.67	-81.46	7.5	6	1	PREDICTED: similar to translation initiation factor 5a isoform 2 [Nasonia vitripennis]	17.7 kDa
gi|156546018	XP_001607980	-21.67	-81.46	7.5	6	1	PREDICTED: similar to translation initiation factor 5a isoform 3 [Nasonia vitripennis]	17.7 kDa
gi|156553823	XP_001606297	-25.02	-113.33	21.1	2	1	PREDICTED: similar to transmembrane protein 14C [Nasonia vitripennis]	11.3 kDa
gi|156554552	XP_001605564	-9.86	-32.3	10.07	3	1	PREDICTED: similar to transmembrane protein, putative [Nasonia vitripennis]	33.9 kDa
gi|156547621	XP_001603693	-4.83	-16.03	3.51	1	1	PREDICTED: similar to trehalose 6-phosphate synthase [Nasonia vitripennis]	89.8 kDa
gi|156551982	XP_001601109	-5.27	-18.45	3.19	1	1	PREDICTED: similar to troponin T [Nasonia vitripennis]	48.3 kDa
gi|156550777	XP_001605974	-4.03	-16.23	23.84	1	1	PREDICTED: similar to ubiquitin-conjugating enzyme rad6 [Nasonia vitripennis]	17.2 kDa
gi|156543768	XP_001606199	-26.59	-94.79	3.53	5	1	PREDICTED: similar to UDP-glucose pyrophosphorylase [Nasonia vitripennis]	57.6 kDa
gi|156551251	XP_001606776	-3.38	-6.66	8.28	2	1	PREDICTED: similar to uncharacterized conerved protein [Nasonia vitripennis]	35.8 kDa
gi|156553486	XP_001600368	-1.18	1.19	1.58	1	1	PREDICTED: similar to vacuolar protein sorting protein 18 [Nasonia vitripennis]	116.7 kDa
gi|156548580	XP_001607505	-3.59	-12.71	13.57	1	1	PREDICTED: similar to vacuolar sorting protein [Nasonia vitripennis]	24.4 kDa
gi|156542729	XP_001604084	-3.22	-0.04	1.73	2	1	PREDICTED: similar to YTH domain containing 2 [Nasonia vitripennis]	151.6 kDa
gi|156537705	XP_001607928	-2.18	-2.92	1.96	1	1	PREDICTED: similar to zinc finger protein [Nasonia vitripennis]	131.2 kDa

## Sheet: Only Diapause
Accession	Protein Description							Additional annotation
XP_001608110	PREDICTED: similar to 3-hydroxyacyl-CoA dehydrogenase type II isoform 1 [Nasonia vitripennis]
XP_001608111	PREDICTED: similar to 3-hydroxyacyl-CoA dehydrogenase type II isoform 2 [Nasonia vitripennis]
XP_001606909	PREDICTED: similar to chymotrypsin [Nasonia vitripennis]
XP_001602894	PREDICTED: similar to cuticle protein LCP65Ac [Nasonia vitripennis]
XP_001608218	PREDICTED: similar to electron-transfer-flavoprotein beta polypeptide [Nasonia vitripennis]
XP_001605133	PREDICTED: similar to ENSANGP00000010625 [Nasonia vitripennis]
XP_001607498	PREDICTED: similar to ENSANGP00000022464 [Nasonia vitripennis]
XP_001599698	PREDICTED: similar to GA14756-PA [Nasonia vitripennis]
XP_001599068	PREDICTED: similar to microsomal dipeptidase [Nasonia vitripennis]
XP_001605732	PREDICTED: hypothetical protein [Nasonia vitripennis]
XP_001599978	PREDICTED: hypothetical protein [Nasonia vitripennis]
XP_001606978	PREDICTED: similar to actin [Nasonia vitripennis]
XP_001603449	PREDICTED: similar to aldehyde dehydrogenase [Nasonia vitripennis]
XP_001600751	PREDICTED: similar to Annexin IX-A [Nasonia vitripennis]
XP_001602182	PREDICTED: similar to CG17838-PE [Nasonia vitripennis]							mrna binding
XP_001599777	PREDICTED: similar to cytochrome P450 [Nasonia vitripennis]
XP_001599720	PREDICTED: similar to ENSANGP00000022132 [Nasonia vitripennis]							Dihydropteridine reductase
XP_001601693	PREDICTED: similar to ENSANGP00000022132 [Nasonia vitripennis]
XP_001602485	PREDICTED: similar to ENSANGP00000022132 [Nasonia vitripennis]
XP_001604694	PREDICTED: similar to ENSANGP00000023709 [Nasonia vitripennis]							long-chain-fatty-acid-CoA liga
XP_001601902	PREDICTED: similar to fumarylacetoacetate hydrolase [Nasonia vitripennis]
XP_001601249	PREDICTED: similar to GA14484-PA [Nasonia vitripennis]							V-ATPase_V1
XP_001606616	PREDICTED: similar to GA18288-PA [Nasonia vitripennis]							3-2trans-enoyl-CoA isomerase
XP_001605063	PREDICTED: similar to GA21314-PA [Nasonia vitripennis]							enoyl-CoA hydratase/isomerase family
XP_001600652	PREDICTED: similar to Na/Ca exchange protein isoform 1 [Nasonia vitripennis]
XP_001600904	PREDICTED: similar to Na/Ca exchange protein isoform 2 [Nasonia vitripennis]
XP_001608208	PREDICTED: similar to protease m1 zinc metalloprotease [Nasonia vitripennis]
XP_001602867	PREDICTED: similar to pupal cuticle protein 78E, putative, partial [Nasonia vitripennis]
XP_001602658	PREDICTED: similar to putative alcohol dehydrogenase [Nasonia vitripennis]
XP_001602766	PREDICTED: similar to putative chymotrypsin-like protein [Nasonia vitripennis]
XP_001600011	PREDICTED: similar to putative prohibitin [Nasonia vitripennis]
XP_001604584	PREDICTED: similar to pyruvate dehydrogenase [Nasonia vitripennis]
XP_001604366	PREDICTED: similar to RE22593p [Nasonia vitripennis]							unknown
XP_001600790	PREDICTED: similar to ribosomal protein S13e [Nasonia vitripennis]
XP_001606297	PREDICTED: similar to transmembrane protein 14C [Nasonia vitripennis]
XP_001603693	PREDICTED: similar to trehalose 6-phosphate synthase [Nasonia vitripennis]
XP_001600119	PREDICTED: similar to triosephoshpate isomerase [Nasonia vitripennis]
XP_001602538	PREDICTED: similar to venom carbohydrate-rich protein [Nasonia vitripennis]
XP_001604681	PREDICTED: similar to ribosomal protein S2 [Nasonia vitripennis]
XP_001606332	PREDICTED: similar to sulfotransferase (sult) [Nasonia vitripennis]
